# Supplementary material for: Iodine(III)-mediated halogenations of acyclic monoterpenoids
Source: PubMed Central journal article supplement (PMC6009204; doi:10.3762/bjoc.14.96), 2018-05-18

**Supporting Information**  
**for**  
**Iodine(III)-mediated halogenations of acyclic**  
**monoterpenoids**

Laure Peilleron, Tatyana D. Grayfer, Joëlle Dubois, Robert H. Dodd and Kevin Cariou\*

Address: Institut de Chimie des Substances Naturelles, CNRS UPR 2301, Université Paris-Sud,  
Université Paris-Saclay, Avenue de la Terrasse, 91198 Gif-sur-Yvette, France

Email: Kevin Cariou - kevin.cariou@cnr.fr

\* Corresponding author

**Full characterization data of all new compounds and copies of**  
**<sup>1</sup>H and <sup>13</sup>C NMR spectra**

|                                                                                      |            |
|--------------------------------------------------------------------------------------|------------|
| 1. General remarks                                                                   | <b>S2</b>  |
| 2. Procedures and analytical data for starting materials                             | <b>S2</b>  |
| 3. Procedures and analytical data for dibromination products                         | <b>S3</b>  |
| 4. Procedures and analytical data for trifluoroacetoxy-bromination products          | <b>S6</b>  |
| 5. Procedures and analytical data for hydroxy-bromination products                   | <b>S9</b>  |
| 6. Procedures and analytical data for trifluoroacetoxy-iodination products           | <b>S12</b> |
| 7. Procedures and analytical data for allylic-chlorination products                  | <b>S15</b> |
| 8. Copies of <sup>1</sup> H and <sup>13</sup> C NMR spectra for starting materials   | <b>S18</b> |
| 9. Copies of <sup>1</sup> H and <sup>13</sup> C NMR spectra for halogenated products | <b>S20</b> |

## 1. General remarks

Infrared spectra were recorded on a Perkin Elmer Spectrum BX FT-IR spectrometer. Proton ( $^1\text{H}$ ) and carbon ( $^{13}\text{C}$ ) NMR spectra were recorded on Bruker Avance 300 MHz spectrometer (QNP or Dual probe). Carbon NMR ( $^{13}\text{C}$ ) spectra were recorded at 75 MHz, using a broadband decoupled mode with the multiplicities obtained using a DEPT sequence. NMR experiments were carried out in deuteriochloroform ( $\text{CDCl}_3$ ), chemical shifts ( $\delta$ ) are reported in parts per million (ppm) with reference to  $\text{CDCl}_3$  ( $^1\text{H}$ : 7.26;  $^{13}\text{C}$ : 77.23) and deuterobenzene ( $\text{C}_6\text{D}_6$ ), chemical shifts ( $\delta$ ) are reported in parts per million (ppm) with reference to  $\text{C}_6\text{D}_6$  ( $^1\text{H}$ : 7.15;  $^{13}\text{C}$ : 128.62). The following abbreviations are used for the proton spectra multiplicities: s: singlet, bs: broad singlet, d: doublet, t: triplet, q: quartet, m: multiplet, br: broad. Coupling constants ( $J$ ) are reported in Hertz (Hz). High resolution mass spectra (HRMS) were obtained from a Time-of-Flight analyzer (ESI-MS). Thin-layer chromatography was performed on silica gel 60 F254 on aluminum plates (Merck) and visualized under a UVP Mineralight UVLS-28 lamp (254 nm) and with TLC stains (phosphomolybdic acid or potassium permanganate in ethanol). Flash chromatography was conducted on Merck silica gel 60 (40–63  $\mu\text{m}$ ) on a CombiFlash apparatus (Serlabo Technologies) at medium pressure (300 mbar), using standard settings. All reagents were obtained from commercial suppliers unless stated otherwise. Where necessary, organic solvents were routinely dried and/or distilled prior to use and stored over molecular sieves under nitrogen. All reactions were conducted under an argon atmosphere, unless stated otherwise.

## 2. Procedures and analytical data for starting materials

### *(E)-N-(3,7-Dimethylocta-2,6-dien-1-yl)-4-methylbenzenesulfonamide (1d)*

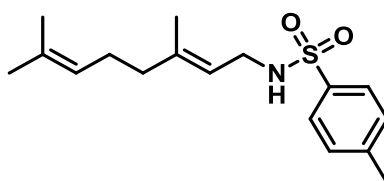

$\text{C}_{17}\text{H}_{25}\text{NO}_2\text{S}$ , 307.4520 g/mol

To a solution of geranylamine (204.8 mg, 1.34 mmol) in anhydrous dichloromethane (8 mL) at room temperature, triethylamine (0.56 mL, 4.01 mmol) and DMAP (8.2 mg, 0.067 mmol) were added. The reaction mixture was cooled to 0 °C and *p*-toluenesulfonyl chloride (280.2 mg, 1.47 mmol) was added. After stirring at room temperature for 5 hours, the reaction mixture was quenched with saturated aqueous  $\text{NH}_4\text{Cl}$  solution. The aqueous layer was extracted twice with EtOAc. The combined organic extracts were washed with saturated aqueous  $\text{NH}_4\text{Cl}$  solution, water and brine, dried over  $\text{MgSO}_4$ , filtered and concentrated under reduced pressure. The crude residue

was purified by flash chromatography on silica gel (PE/EtOAc 100/0 → 95/5) to afford **1d** (384 mg, 93%) as a colorless oil. The chemical shifts of the product are in accordance with literature.<sup>1</sup>

**NMR <sup>1</sup>H (300 MHz, CDCl<sub>3</sub>):** δ = 7.75 (d, *J* = 8.2 Hz, 2H, CH<sub>Ar</sub>), 7.30 (d, *J* = 8.2 Hz, 2H, CH<sub>Ar</sub>), 5.09–5.00 (m, 2H, =CH), 4.34 (bt, *J* = 5.4 Hz, 1H, NH), 3.55 (d, *J* = 6.4 Hz, 2H, CH<sub>2</sub>-NHTs), 2.44 (s, 3H, CH<sub>3</sub>-Ar), 2.00–1.90 (m, 4H, CH<sub>2</sub>), 1.67 (s, 3H, (CH<sub>3</sub>)<sub>2</sub>C=C), 1.57 (s, 3H, (CH<sub>3</sub>)<sub>2</sub>C=C), 1.54 (s, 3H, CH<sub>3</sub>-C=C).

**NMR <sup>13</sup>C (75 MHz, CDCl<sub>3</sub>):** δ = 143.3 (C<sub>q</sub>), 141.1 (C<sub>q</sub>), 137.1 (C<sub>q</sub>), 131.8 (C<sub>q</sub>), 129.6 (2CH), 127.2 (2CH), 123.6 (CH), 118.6 (CH), 41.0 (NHCH<sub>2</sub>), 39.3 (CH<sub>2</sub>), 26.2 (CH<sub>2</sub>), 25.6 (CH<sub>3</sub>), 21.5 (CH<sub>3</sub>), 17.7 (CH<sub>3</sub>), 16.2 (CH<sub>3</sub>).

**HRMS (ESI):** *m/z* calcd for C<sub>17</sub>H<sub>26</sub>NO<sub>2</sub>S<sup>+</sup>, [M+H]<sup>+</sup> 308.1679, found 308.1689.  
*m/z* calcd for C<sub>17</sub>H<sub>25</sub>NNaO<sub>2</sub>S<sup>+</sup>, [M+Na]<sup>+</sup> 330.1498, found 330.1507.  
*m/z* calcd for C<sub>19</sub>H<sub>28</sub>N<sub>2</sub>NaO<sub>2</sub>S<sup>+</sup>, [M+CH<sub>3</sub>CN+Na]<sup>+</sup> 371.1764, found 371.1768.

**IR (cm<sup>-1</sup>):** 3278, 2919, 1424, 1324, 1157, 1094, 1048, 814, 662.

### 3. Procedures and analytical data for dibromination products

#### (*E*)-6,7-Dibromo-3,7-dimethyloct-2-en-1-yl acetate (**2a**)

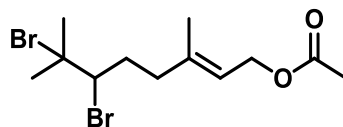

C<sub>12</sub>H<sub>20</sub>Br<sub>2</sub>O<sub>2</sub>, 356.0980 g/mol

General procedure A was applied to geranyl acetate (**1a**, 28 mg, 0.14 mmol). The crude residue was purified by flash chromatography on silica gel (PE/EtOAc 100/0 → 95/5) to afford **2a** (48 mg, 91%) as a colorless oil. The chemical shifts of the product are in accordance with literature.<sup>2</sup>

**NMR <sup>1</sup>H (300 MHz, CDCl<sub>3</sub>):** δ = 5.43 (bt, *J* = 7.0 Hz, =CH), 4.59 (d, *J* = 7.0 Hz, 2H, CH<sub>2</sub>-OAc), 4.11 (dd, *J* = 10.0, 1.2 Hz, 1H, CH-Br), 2.62–2.52 (m, 1H, CH<sub>2</sub>), 2.46–2.35 (m, 1H, CH<sub>2</sub>), 2.25–2.15 (m, 1H, CH<sub>2</sub>), 2.05 (s, 3H, Ac), 1.97 (s, 3H, CH<sub>3</sub>), 1.95–1.82 (m, 1H, CH<sub>2</sub>), 1.80 (s, 3H, CH<sub>3</sub>), 1.73 (s, 3H, CH<sub>3</sub>-C=C).

**NMR <sup>13</sup>C (75 MHz, CDCl<sub>3</sub>):** δ = 171.2 (C=O), 140.3 (C<sub>q</sub>), 120.2 (CH), 68.8 (C<sub>q</sub>), 65.8 (CH-Br), 61.4 (OCH<sub>2</sub>), 37.9 (CH<sub>2</sub>), 35.6 (CH<sub>3</sub>), 33.7 (CH<sub>2</sub>), 28.3 (CH<sub>3</sub>), 21.2 (CH<sub>3</sub>), 16.6 (CH<sub>3</sub>).

**HRMS (ESI):** *m/z* calcd for C<sub>10</sub>H<sub>16</sub><sup>79</sup>Br<sup>+</sup>, [M-Br-HOAc]<sup>+</sup> 215.0430, found 215.0438.

**IR (cm<sup>-1</sup>):** 2978, 2929, 1737, 1454, 1386, 1370, 1227, 1097, 1021, 1022, 955, 869, 820, 777.

<sup>1</sup> F. Inagaki; S. Hira; C. Mukai; *Synlett*, **2017**, 28, 2143–2146.

<sup>2</sup> A. M. Moiseenkov, V. A. Dragan, A. V. Lozanova, V. V. Veselovskii. *Russ. Chem. Bull.* **1988**, 8, 1797–1803.

**(Z)-6,7-Dibromo-3,7-dimethyloct-2-en-1-yl acetate (2b)**

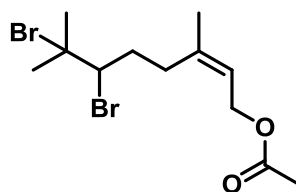

C<sub>12</sub>H<sub>20</sub>Br<sub>2</sub>O<sub>2</sub>, 356.0980 g/mol

General procedure A was applied to neryl acetate (**1b**, 50 mg, 0.25 mmol). The crude residue was purified by flash chromatography on silica gel (PE/EtOAc 98/2 → 95/5) to afford **2b** (86 mg, 97%) as a colorless oil.

**NMR <sup>1</sup>H (300 MHz, CDCl<sub>3</sub>):** δ = 5.38 (bt, *J* = 7.3 Hz, 1H, =CH), 4.55 (dd, *J* = 7.3, 2.3 Hz, 2H, CH<sub>2</sub>-OAc), 4.03 (dd, *J* = 11.0, 1.3 Hz, 1H, CH-Br), 2.57–2.46 (m, 1H, CH<sub>2</sub>), 2.42–2.22 (m, 2H, CH<sub>2</sub>), 1.99 (s, 3H, Ac), 1.91 (s, 3H, CH<sub>3</sub>), 1.89–1.76 (m, 1H, CH<sub>2</sub>), 1.73 (s, 6H, CH<sub>3</sub>-C=C and CH<sub>3</sub>).

**NMR <sup>13</sup>C (75 MHz, CDCl<sub>3</sub>):** δ = 171.1 (C=O), 140.7 (C<sub>q</sub>), 121.1 (CH), 68.5 (C<sub>q</sub>), 65.5 (CH-Br), 61.0 (OCH<sub>2</sub>), 35.4 (CH<sub>3</sub>), 33.9 (CH<sub>2</sub>), 30.2 (CH<sub>2</sub>), 28.0 (CH<sub>3</sub>), 23.3 (CH<sub>3</sub>), 21.1 (CH<sub>3</sub>).

**HRMS (ESI):** *m/z* calcd for C<sub>10</sub>H<sub>16</sub><sup>79</sup>Br<sup>+</sup>, [M-Br-HOAc]<sup>+</sup> 215.0430, found 215.0430.

**IR (cm<sup>-1</sup>):** 2975, 2933, 1737, 1456, 1442, 1371, 1226, 1097, 1021, 954.

**(E)-6,7-Dibromo-3,7-dimethyloct-2-en-1-ol (2c)**

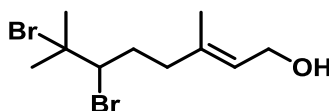

C<sub>10</sub>H<sub>18</sub>Br<sub>2</sub>O, 314.0610 g/mol

General procedure A was applied to geraniol (**1c**, 53 mg, 0.34 mmol). The crude product was purified by flash chromatography on silica gel (DCM 100%) to afford **2c** (67 mg, 63%) as a colorless oil.

**NMR <sup>1</sup>H (300 MHz, CDCl<sub>3</sub>):** δ = 5.52 (bt, *J* = 6.8 Hz, 1H, =CH), 4.18 (bd, *J* = 6.8 Hz, 2H, CH<sub>2</sub>-OH), 4.15 (dd, *J* = 11.1, 1.3 Hz, 1H, CH-Br), 2.64–2.53 (m, 1H, CH<sub>2</sub>), 2.45–2.36 (m, 1H, CH<sub>2</sub>), 2.25–2.15 (m, 1H, CH<sub>2</sub>), 1.98 (s, 3H, CH<sub>3</sub>), 1.96–1.81 (m, 1H, CH<sub>2</sub>), 1.81 (s, 3H, CH<sub>3</sub>), 1.71 (s, 3H, CH<sub>3</sub>-C=C).

**NMR <sup>13</sup>C (75 MHz, CDCl<sub>3</sub>):** δ = 137.7 (C<sub>q</sub>), 125.2 (CH), 68.9 (C<sub>q</sub>), 65.8 (CH-Br), 59.5 (OCH<sub>2</sub>), 37.8 (CH<sub>2</sub>), 35.6 (CH<sub>3</sub>), 33.7 (CH<sub>2</sub>), 28.3 (CH<sub>3</sub>), 16.4 (CH<sub>3</sub>).

**HRMS (ESI):** *m/z* calcd for C<sub>10</sub>H<sub>16</sub><sup>79</sup>Br<sup>+</sup>, [M-Br-H<sub>2</sub>O]<sup>+</sup> 215.0430, found 215.0432.

**IR (cm<sup>-1</sup>):** 3322, 2976, 2928, 2860, 1440, 1386, 1370, 1227, 1096, 997.

**(E)-N-(6,7-Dibromo-3,7-dimethyloct-2-en-1-yl)-4-methylbenzenesulfonamide (2d)**

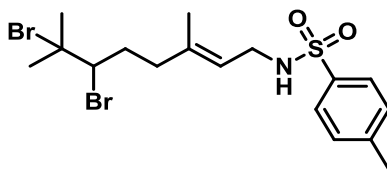

C<sub>17</sub>H<sub>25</sub>Br<sub>2</sub>NO<sub>2</sub>S, 467.2600 g/mol

General procedure A was applied to *N*-tosyl geranylamine (**1d**, 38 mg, 0.124 mmol). The crude residue was purified by flash chromatography on silica gel (PE/EtOAc 90/10) to afford **2d** (28.6 mg, 50%) as a colorless oil.

**NMR** <sup>1</sup>H (300 MHz, CDCl<sub>3</sub>): δ = 7.76 (d, *J* = 8.1 Hz, 2H, CH<sub>Ar</sub>), 7.31 (d, *J* = 8.1 Hz, 2H, CH<sub>Ar</sub>), 5.15 (bt, *J* = 6.7 Hz, 1H, =CH), 4.42 (bs, 1H, NH), 4.05 (d, *J* = 10.9 Hz, 1H, CH-Br), 3.58 (bt, *J* = 6.5 Hz, 2H, CH<sub>2</sub>-NHTs), 2.54–2.48 (m, 1H, CH<sub>2</sub>), 2.44 (s, 3H, CH<sub>3</sub>-Ar), 2.34–2.25 (m, 1H, CH<sub>2</sub>), 2.15–2.05 (m, 1H, CH<sub>2</sub>), 1.97 (s, 3H, CH<sub>3</sub>), 1.84–1.74 (m, 1H, CH<sub>2</sub>), 1.79 (s, 3H, CH<sub>3</sub>), 1.59 (s, 3H, CH<sub>3</sub>-C=C).

**NMR** <sup>13</sup>C (75 MHz, CDCl<sub>3</sub>): δ = 143.4 (C<sub>q</sub>), 139.0 (C<sub>q</sub>), 137.1 (C<sub>q</sub>), 129.7 (2CH), 127.2 (2CH), 120.4 (CH), 68.7 (C<sub>q</sub>), 65.5 (CH-Br), 40.9 (NHCH<sub>2</sub>), 37.5 (CH<sub>2</sub>), 35.4 (CH<sub>3</sub>), 33.5 (CH<sub>2</sub>), 28.1 (CH<sub>3</sub>), 21.6 (CH<sub>3</sub>), 16.2 (CH<sub>3</sub>).

**HRMS (ESI):** *m/z* calcd for C<sub>17</sub>H<sub>25</sub><sup>79</sup>Br<sup>81</sup>BrNNaO<sub>2</sub>S<sup>+</sup>, [M+Na]<sup>+</sup> 489.9844, found 489.9841.  
*m/z* calcd for C<sub>19</sub>H<sub>28</sub><sup>79</sup>Br<sup>81</sup>BrN<sub>2</sub>NaO<sub>2</sub>S<sup>+</sup>, [M+CH<sub>3</sub>CN+Na]<sup>+</sup> 531.0109, found 531.0106.

**IR (cm<sup>-1</sup>):** 3279, 2926, 1429, 1324, 1157, 1095, 1044, 909, 814, 731, 662.

**6,7-Dibromo-7-methyl-3-methyleneoct-1-ene (2e)**

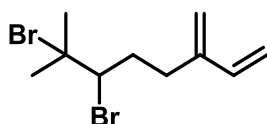

C<sub>10</sub>H<sub>16</sub>Br<sub>2</sub>, 296.0460 g/mol

General procedure A was applied to myrcene (**1e**, 32.3 mg, 0.237 mmol) to afford **2e** (55 mg, 78%) as a colorless oil. The chemical shifts of the product are in accordance with literature.<sup>3</sup> *Caution is to be taken since this product is volatile.*

**NMR** <sup>1</sup>H (300 MHz, CDCl<sub>3</sub>): δ = 6.35 (dd, *J* = 17.6, 10.6 Hz, 1H, CH=CH<sub>2</sub>), 5.29 (d, *J* = 17.6 Hz, 1H, CH<sub>2</sub>=CH), 5.14 (d, *J* = 10.6 Hz, 1H, CH<sub>2</sub>=CH), 5.11 (s, 2H, CH<sub>2</sub>=C), 4.21 (bd, *J* = 11.0 Hz, 1H, CH-Br), 2.74–2.58 (m, 2H, CH<sub>2</sub>), 2.41–2.30 (m, 1H, CH<sub>2</sub>), 2.07–1.93 (m, 1H, CH<sub>2</sub>), 1.99 (s, 3H, CH<sub>3</sub>), 1.83 (s, 3H, CH<sub>3</sub>).

**NMR** <sup>13</sup>C (75 MHz, CDCl<sub>3</sub>): δ = 144.7 (C<sub>q</sub>), 138.4 (CH), 116.9 (CH<sub>2</sub>), 113.8 (CH<sub>2</sub>), 68.4 (C<sub>q</sub>), 66.4 (CH-Br), 35.3 (CH<sub>3</sub>), 34.6 (CH<sub>2</sub>), 30.1 (CH<sub>2</sub>), 28.3 (CH<sub>3</sub>).

**HRMS (ESI):** no ionization could be observed for this compound.

**IR (cm<sup>-1</sup>):** 2977, 2931, 1595, 1456, 1387, 1371, 1221, 1097, 990, 897.

<sup>3</sup> T. Kato, I. Ichinose, *J. Chem. Soc., Perkin Trans. 1*, **1980**, 0, 1051-1056.

## 4. Procedures and analytical data for trifluoroacetoxy-bromination products

### *(E)*-8-Acetoxy-3-bromo-2,6-dimethyloct-6-en-2-yl 2,2,2-trifluoroacetate (**3a**)

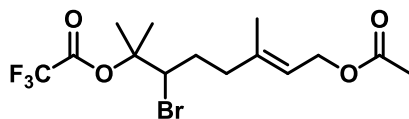

C<sub>14</sub>H<sub>20</sub>BrF<sub>3</sub>O<sub>4</sub>, 389.2092 g/mol

General procedure B was applied to geranyl acetate (**1a**, 39 mg, 0.20 mmol). The crude residue was purified by flash column chromatography (PE/EtOAc 100/0 → 95/5) to afford **3a** (60 mg, 77%) as a colorless oil.

**NMR** <sup>1</sup>H (300 MHz, CDCl<sub>3</sub>): δ = 5.42 (tq, *J* = 7.0, 1.1 Hz, 1H, =CH), 4.59 (d, *J* = 7.0 Hz, 2H, CH<sub>2</sub>-OAc), 4.36 (dd, *J* = 11.1, 2.1 Hz, 1H, CH-Br), 2.45–2.36 (m, 1H, CH<sub>2</sub>), 2.23–2.13 (m, 1H, CH<sub>2</sub>), 2.05 (s, 3H, Ac), 2.04–1.92 (m, 1H, CH<sub>2</sub>), 1.87–1.77 (m, 1H, CH<sub>2</sub>), 1.70 (s, 9H, CH<sub>3</sub>).

**NMR** <sup>13</sup>C (75 MHz, CDCl<sub>3</sub>): δ = 171.3 (C=O), 156.0 (q, *J* = 42 Hz, CF<sub>3</sub>C=O), 140.0 (C<sub>q</sub>), 120.5 (CH), 114.4 (q, *J* = 287 Hz, CF<sub>3</sub>), 89.5 (C<sub>q</sub>), 61.3 (OCH<sub>2</sub>), 59.4 (CH-Br), 37.6 (CH<sub>2</sub>), 31.2 (CH<sub>2</sub>), 24.3 (CH<sub>3</sub>), 22.5 (CH<sub>3</sub>), 21.2 (CH<sub>3</sub>), 16.5 (CH<sub>3</sub>).

**NMR** <sup>19</sup>F (300 Hz, CDCl<sub>3</sub>): δ = -75.6.

**HRMS (APPI)**: *m/z* calcd for C<sub>14</sub>H<sub>20</sub>F<sub>3</sub>O<sub>4</sub><sup>+</sup>, [M-Br]<sup>+</sup> 309.1308, found 309.1319.

**IR (cm<sup>-1</sup>)**: 2993, 2950, 1780, 1737, 1446, 1367, 1218, 1159, 1116, 1023, 957, 871, 852, 774, 730.

### *(Z)*-8-Acetoxy-3-bromo-2,6-dimethyloct-6-en-2-yl 2,2,2-trifluoroacetate (**3b**)

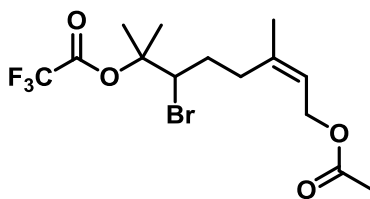

C<sub>14</sub>H<sub>20</sub>BrF<sub>3</sub>O<sub>4</sub>, 389.2092 g/mol

General procedure B was applied to neryl acetate (**3b**, 57 mg, 0.290 mmol). The crude residue was purified by flash column chromatography (PE/EtOAc 100/0 → 95/05) to afford **3b** (85 mg, 75%) as a colorless oil.

**NMR** <sup>1</sup>H (300 MHz, CDCl<sub>3</sub>): δ = 5.45 (bt, *J* = 7.3 Hz, 1H, =CH), 4.61 (d, *J* = 7.3 Hz, 2H, CH<sub>2</sub>-OAc), 4.32 (dd, *J* = 11.3, 1.7 Hz, 1H, CH-Br), 2.46–2.30 (m, 2H, CH<sub>2</sub>), 2.06 (s, 3H, Ac), 2.04–1.96 (m, 1H, CH<sub>2</sub>), 1.88–1.80 (m, 1H, CH<sub>2</sub>), 1.76 (s, 3H, CH<sub>3</sub>-C=C), 1.71 (s, 6H, CH<sub>3</sub>).

**NMR** <sup>13</sup>C (75 MHz, CDCl<sub>3</sub>): δ = 170.9 (C=O), 155.8 (q, *J* = 41.7 Hz, CF<sub>3</sub>C=O), 140.2 (C<sub>q</sub>), 121.4 (CH), 114.2 (q, *J* = 287 Hz, CF<sub>3</sub>), 89.2 (C<sub>q</sub>), 60.8 (OCH<sub>2</sub>), 59.3 (CH-Br), 31.3 (CH<sub>2</sub>), 30.1 (CH<sub>2</sub>), 24.0 (CH<sub>3</sub>), 23.0 (CH<sub>3</sub>), 22.2 (CH<sub>3</sub>), 21.0 (CH<sub>3</sub>).

**NMR  $^{19}\text{F}$  (300 Hz,  $\text{CDCl}_3$ ):**  $\delta = -75.6$ .

**HRMS (ESI):**  $m/z$  calcd for  $\text{C}_{14}\text{H}_{20}^{79}\text{BrF}_3\text{NaO}_4^+$ ,  $[\text{M}+\text{Na}]^+$  411.0389, found 411.0398.  
 $m/z$  calcd for  $\text{C}_{16}\text{H}_{23}^{79}\text{BrF}_3\text{NNaO}_4^+$ ,  $[\text{M}+\text{CH}_3\text{CN}+\text{Na}]^+$  452.0655, found 452.0661  
 $m/z$  calcd for  $\text{C}_{14}\text{H}_{20}^{81}\text{BrF}_3\text{NaO}_4^+$ ,  $[\text{M}+\text{Na}]^+$  413.0369, found 413.0388.  
 $m/z$  calcd for  $\text{C}_{16}\text{H}_{23}^{81}\text{BrF}_3\text{NNaO}_4^+$ ,  $[\text{M}+\text{CH}_3\text{CN}+\text{Na}]^+$  454.0635, found 454.0649

**IR ( $\text{cm}^{-1}$ ):** 2938, 1780, 1737, 1446, 1367, 1219, 1159, 1116, 1022, 956, 870, 850, 774, 730.

**(E)-3-Bromo-8-hydroxy-2,6-dimethyloct-6-en-2-yl 2,2,2-trifluoroacetate (3c)**

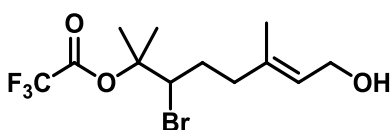

$\text{C}_{12}\text{H}_{18}\text{BrF}_3\text{O}_3$ , 347.1722 g/mol

General procedure B was applied to geraniol (**1c**, 46 mg, 0.30 mmol). The crude residue was purified by flash column chromatography (PE/EtOAc 100/0  $\rightarrow$  80/20) to afford **3c** (59 mg, 57%) as a colorless oil.

**NMR  $^1\text{H}$  (300 MHz,  $\text{CDCl}_3$ ):**  $\delta = 5.48$  (bt,  $J = 6.8$  Hz, =CH), 4.40 (dd,  $J = 11.3, 1.9$  Hz, 1H, CH-Br), 4.16 (d,  $J = 6.8$  Hz, 2H,  $\text{CH}_2\text{-OH}$ ), 2.43–2.33 (m, 1H,  $\text{CH}_2$ ), 2.22–2.11 (m, 1H,  $\text{CH}_2$ ), 2.03–1.92 (m, 1H,  $\text{CH}_2$ ), 1.88–1.76 (m, 1H,  $\text{CH}_2$ ), 1.70 (s, 3H,  $\text{CH}_3$ ), 1.69 (s, 3H,  $\text{CH}_3$ ), 1.66 (s, 3H,  $\text{CH}_3\text{-C=C}$ ).

**NMR  $^{13}\text{C}$  (75 MHz,  $\text{CDCl}_3$ ):**  $\delta = 156.1$  (q,  $J = 42$  Hz,  $\text{CF}_3\text{C=O}$ ), 137.4 ( $\text{C}_q$ ), 125.6 (CH), 114.4 (q,  $J = 287$  Hz,  $\text{CF}_3$ ), 89.6 ( $\text{C}_q$ ), 59.4 ( $\text{OCH}_2$ ), 59.2 (CH-Br), 37.5 ( $\text{CH}_2$ ), 31.2 ( $\text{CH}_2$ ), 24.3 ( $\text{CH}_3$ ), 22.5 ( $\text{CH}_3$ ), 16.2 ( $\text{CH}_3$ ),

**NMR  $^{19}\text{F}$  (300 Hz,  $\text{CDCl}_3$ ):**  $\delta = -75.6$ .

**HRMS (ESI):**  $m/z$  calcd for  $\text{C}_{12}\text{H}_{18}^{79}\text{BrF}_3\text{O}_3^{35}\text{Cl}^-$ ,  $[\text{M}+\text{Cl}]^-$  381.0085, found 381.0076.

**IR ( $\text{cm}^{-1}$ ):** 3380–3340, 2991, 2927, 2857, 1781, 1670, 1463, 1446, 1370, 1222, 1165, 1117, 1004, 870, 848, 775, 730, 635, 526.

**(E)-3-Bromo-2,6-dimethyl-8-((4-methylphenyl)sulfonamido)oct-6-en-2-yl 2,2,2-trifluoroacetate (3d)**

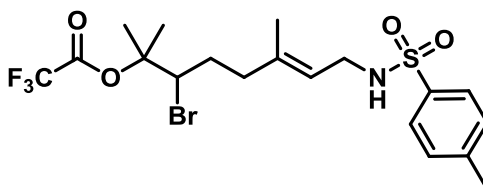

$\text{C}_{19}\text{H}_{25}\text{BrF}_3\text{NO}_4\text{S}$ , 500.3712 g/mol

General procedure B was applied to *N*-tosyl geranylamine (**1d**, 36 mg, 0.117 mmol). The crude residue was purified by flash chromatography on silica gel (PE/EtOAc 85/15) to afford **3d** (49 mg, 84%) as a colorless oil.

**NMR  $^1\text{H}$  (300 MHz,  $\text{CDCl}_3$ ):**  $\delta$  = 7.78 (d,  $J$  = 8.2 Hz, 2H,  $\text{CH}_{\text{Ar}}$ ), 7.33 (d,  $J$  = 8.2 Hz, 2H,  $\text{CH}_{\text{Ar}}$ ), 5.16 (tq,  $J$  = 7.0, 0.9 Hz, 1H, =CH), 4.50 (bs, 1H, NH), 4.35 (dd,  $J$  = 11.1, 1.9 Hz, 1H, CH-Br), 3.59 (t,  $J$  = 7.0 Hz, 2H,  $\text{CH}_2\text{-NHTs}$ ), 2.46 (s, 3H,  $\text{CH}_3\text{-Ar}$ ), 2.34–2.25 (m, 1H,  $\text{CH}_2$ ), 2.15–2.05 (m, 1H,  $\text{CH}_2$ ), 1.96–1.85 (m, 1H,  $\text{CH}_2$ ), 1.81–1.79 (m, 1H,  $\text{CH}_2$ ), 1.72 (s, 3H,  $\text{CH}_3$ ), 1.70 (s, 3H,  $\text{CH}_3$ ), 1.56 (s, 3H,  $\text{CH}_3\text{-C=C}$ ).

**NMR  $^{13}\text{C}$  (75 MHz,  $\text{CDCl}_3$ ):**  $\delta$  = 155.9 (q,  $J$  = 42.8 Hz,  $\text{CF}_3\text{C=O}$ ), 143.5 ( $\text{C}_q$ ), 138.7 ( $\text{C}_q$ ), 137.0 ( $\text{C}_q$ ), 129.7 (2CH), 127.2 (2CH), 120.8 (CH), 114.2 (q,  $J$  = 287 Hz,  $\text{CF}_3$ ), 89.5 ( $\text{C}_q$ ), 58.7 (CH-Br), 40.9 (NH $\text{CH}_2$ ), 37.1 ( $\text{CH}_2$ ), 30.8 ( $\text{CH}_2$ ), 24.1 ( $\text{CH}_3$ ), 22.4 ( $\text{CH}_3$ ), 21.6 ( $\text{CH}_3$ ), 16.0 ( $\text{CH}_3$ ).

**NMR  $^{19}\text{F}$  (300 Hz,  $\text{CDCl}_3$ ):**  $\delta$  = -75.5.

**HRMS (ESI):**  $m/z$  calcd for  $\text{C}_{19}\text{H}_{25}^{79}\text{BrF}_3\text{NNaO}_4\text{S}^+$ ,  $[\text{M}+\text{Na}]^+$  522.0532, found 522.0536  
 $m/z$  calcd for  $\text{C}_{21}\text{H}_{28}^{79}\text{BrF}_3\text{N}_2\text{NaO}_4\text{S}^+$ ,  $[\text{M}+\text{CH}_3\text{CN}+\text{Na}]^+$  563.0797, found 563.0797  
 $m/z$  calcd for  $\text{C}_{19}\text{H}_{25}^{81}\text{BrF}_3\text{NNaO}_4\text{S}^+$ ,  $[\text{M}+\text{Na}]^+$  524.0511, found 524.0516  
 $m/z$  calcd for  $\text{C}_{21}\text{H}_{28}^{81}\text{BrF}_3\text{N}_2\text{NaO}_4\text{S}^+$ ,  $[\text{M}+\text{CH}_3\text{CN}+\text{Na}]^+$  565.0777, found 565.0784

**IR ( $\text{cm}^{-1}$ ):** 3280, 2928, 1779, 1599, 1370, 1326, 1218, 1155, 814, 663.

### 3-Bromo-2-methyl-6-methyleneoct-7-en-2-yl 2,2,2-trifluoroacetate (**3e**)

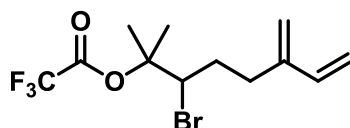

$\text{C}_{12}\text{H}_{16}\text{BrF}_3\text{O}_2$ , 329.1572 g/mol

General procedure B was applied to myrcene (**1e**, 44.8 mg, 0.329 mmol). The crude residue was purified by flash chromatography on silica gel (PE 100%) to afford **3e** (72 mg, 67%) as a colorless oil. *Caution is to be taken since this product is volatile.*

**NMR  $^1\text{H}$  (300 MHz,  $\text{CDCl}_3$ ):**  $\delta$  = 6.24 (dd,  $J$  = 17.7, 10.8 Hz, 1H,  $\text{CH}=\text{CH}_2$ ), 5.14 (d,  $J$  = 17.7 Hz, 1H,  $\text{CH}_2=\text{CH}$ ), 5.04 (d,  $J$  = 10.8 Hz, 1H,  $\text{CH}_2=\text{CH}$ ), 5.02 (s, 1H,  $\text{CH}_2=\text{C}$ ), 5.00 (s, 1H,  $\text{CH}_2=\text{C}$ ), 4.35 (dd,  $J$  = 11.2, 1.8 Hz, 1H, CH-Br), 2.64–2.55 (m, 1H,  $\text{CH}_2$ ), 2.31–2.21 (m, 1H,  $\text{CH}_2$ ), 2.02–1.91 (m, 1H,  $\text{CH}_2$ ), 1.87–1.74 (m, 1H,  $\text{CH}_2$ ), 1.62 (s, 3H,  $\text{CH}_3$ ), 1.61 (s, 3H,  $\text{CH}_3$ ).

**NMR  $^{13}\text{C}$  (75 MHz,  $\text{CDCl}_3$ ):**  $\delta$  = 155.8 (q,  $J$  = 41.7 Hz,  $\text{CF}_3\text{C=O}$ ), 144.4 ( $\text{C}_q$ ), 138.1 (CH), 117.3 ( $\text{CH}_2$ ), 113.8 ( $\text{CH}_2$ ), 114.2 (q,  $J$  = 287 Hz,  $\text{CF}_3$ ), 89.2 ( $\text{C}_q$ ), 59.5 (CH-Br), 31.8 ( $\text{CH}_2$ ), 29.8 ( $\text{CH}_2$ ), 24.0 ( $\text{CH}_3$ ), 22.4 ( $\text{CH}_3$ ).

**NMR  $^{19}\text{F}$  (300 Hz,  $\text{CDCl}_3$ ):**  $\delta$  = -75.6.

**HRMS (ESI):** no ionization could be observed for this compound.

**IR ( $\text{cm}^{-1}$ ):** 2948, 1779, 1596, 1461, 1367, 1218, 1159, 1116, 992, 901, 872, 854, 774, 731.



## 5. Procedures and analytical data for hydroxy-bromination products

### **(E)-6-Bromo-7-hydroxy-3,7-dimethyloct-2-en-1-yl acetate (4a)**

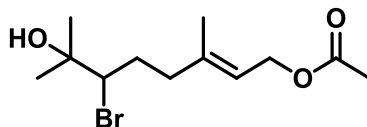

C<sub>12</sub>H<sub>21</sub>BrO<sub>3</sub>, 293.2010 g/mol

General procedure C was applied to geranyl acetate (**1a**, 55.8 mg, 0.284 mmol). The crude product was purified by flash chromatography on silica gel (PE/EtOAc 100/0 → 90/10 → 80/20) to afford **4a** (58 mg, 70%) as a colorless oil. The chemical shifts of the product are in accordance with literature.<sup>4</sup>

**NMR** <sup>1</sup>H (300 MHz, CDCl<sub>3</sub>): δ = 5.31 (tq, *J* = 7.0, 1.1 Hz, 1H, =CH), 4.51 (d, *J* = 7.0 Hz, 2H, CH<sub>2</sub>-OAc), 3.86 (dd, *J* = 11.3, 2.1 Hz, 1H, CH-Br), 2.39–2.30 (m, 1H, CH<sub>2</sub>), 2.14–2.04 (m, 1H, CH<sub>2</sub>), 2.02–1.91 (m, 1H, CH<sub>2</sub>), 1.99 (s, 3H, Ac), 1.83–1.70 (m, 1H, CH<sub>2</sub>), 1.64 (s, 3H, CH<sub>3</sub>-C=C), 1.28 (s, 3H, CH<sub>3</sub>), 1.27 (s, 3H, CH<sub>3</sub>).

**NMR** <sup>13</sup>C (75 MHz, CDCl<sub>3</sub>): δ = 171.1 (C=O), 140.4 (C<sub>q</sub>), 119.7 (CH), 72.5 (C<sub>q</sub>), 70.2 (CH-Br), 61.2 (OCH<sub>2</sub>), 38.1 (CH<sub>2</sub>), 31.8 (CH<sub>2</sub>), 26.6 (CH<sub>3</sub>), 26.0 (CH<sub>3</sub>), 21.0 (CH<sub>3</sub>), 16.4 (CH<sub>3</sub>).

**HRMS (ESI):** *m/z* calcd for C<sub>12</sub>H<sub>21</sub><sup>79</sup>BrNaO<sub>3</sub><sup>+</sup>, [M+Na]<sup>+</sup> 315.0566, found 315.0575.  
*m/z* calcd for C<sub>14</sub>H<sub>24</sub><sup>79</sup>BrNNaO<sub>3</sub><sup>+</sup>, [M+CH<sub>3</sub>CN+Na]<sup>+</sup> 356.0832, found 356.0838  
*m/z* calcd for C<sub>12</sub>H<sub>21</sub><sup>81</sup>BrNaO<sub>3</sub><sup>+</sup>, [M+Na]<sup>+</sup> 317.0546, found 317.0560.  
*m/z* calcd for C<sub>14</sub>H<sub>24</sub><sup>81</sup>BrNNaO<sub>3</sub><sup>+</sup>, [M+CH<sub>3</sub>CN+Na]<sup>+</sup> 358.0812, found 358.0826

**IR (cm<sup>-1</sup>):** 3454, 2978, 2932, 1718, 1670, 1444, 1366, 1230, 1120, 1023, 955, 908, 774, 733.

### **(Z)-6-Bromo-7-hydroxy-3,7-dimethyloct-2-en-1-yl acetate (4b)**

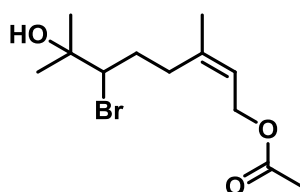

C<sub>12</sub>H<sub>21</sub>BrO<sub>3</sub>, 293.2010 g/mol

General procedure C was applied to neryl acetate (**1b**, 58.2 mg, 0.297 mmol). The crude residue was purified by flash chromatography on silica gel (PE/EtOAc 100/0 → 90/10 → 80/20) to afford **4b** (52.6 mg, 61%) as a colorless oil.

<sup>4</sup> M. Nahmany, A. Melman, *Tetrahedron*, **2005**, *61*, 7481–7488.

**NMR <sup>1</sup>H (300 MHz, CDCl<sub>3</sub>):** δ = 5.34 (bt, *J* = 7.3 Hz, 1H, =CH), 4.54 (bd, *J* = 7.3 Hz, 2H, CH<sub>2</sub>-OAc), 3.85 (dd, *J* = 11.2, 2.0 Hz, 1H, CH-Br), 2.26 (t, *J* = 7.4 Hz, 2H, CH<sub>2</sub>), 1.98 (s, 3H, Ac), 1.97–1.91 (m, 1H, CH<sub>2</sub>), 1.82–1.72 (m, 1H, CH<sub>2</sub>), 1.69 (s, 3H, CH<sub>3</sub>-C=C), 1.28 (s, 3H, CH<sub>3</sub>), 1.27 (s, 3H, CH<sub>3</sub>).

**NMR <sup>13</sup>C (75 MHz, CDCl<sub>3</sub>):** δ = 171.0 (C=O), 140.9 (C<sub>q</sub>), 120.8 (CH), 72.4 (C<sub>q</sub>), 70.1 (CH-Br), 61.0 (OCH<sub>2</sub>), 32.2 (CH<sub>2</sub>), 30.8 (CH<sub>2</sub>), 26.6 (CH<sub>3</sub>), 26.1 (CH<sub>3</sub>), 23.3 (CH<sub>3</sub>), 21.1 (CH<sub>3</sub>).

**HRMS (ESI):** *m/z* calcd for C<sub>12</sub>H<sub>21</sub><sup>79</sup>BrNaO<sub>3</sub><sup>+</sup>, [M+Na]<sup>+</sup> 315.0566, found 315.0583  
*m/z* calcd for C<sub>14</sub>H<sub>24</sub><sup>79</sup>BrNNaO<sub>3</sub><sup>+</sup>, [M+CH<sub>3</sub>CN+Na]<sup>+</sup> 356.0832, found 356.0844  
*m/z* calcd for C<sub>12</sub>H<sub>21</sub><sup>81</sup>BrNaO<sub>3</sub><sup>+</sup>, [M+Na]<sup>+</sup> 317.0546, found 317.0565  
*m/z* calcd for C<sub>14</sub>H<sub>24</sub><sup>81</sup>BrNNaO<sub>3</sub><sup>+</sup>, [M+CH<sub>3</sub>CN+Na]<sup>+</sup> 358.0812, found 358.0830

**IR (cm<sup>-1</sup>):** 3453, 2974, 2936, 1718, 1668, 1445, 1378, 1231, 1120, 1023, 955, 911, 842, 774.

**(*E*)-6-Bromo-3,7-dimethyloct-2-ene-1,7-diol (4c)**

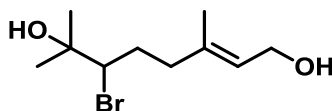

C<sub>10</sub>H<sub>19</sub>BrO<sub>2</sub>, 251.1640 g/mol

General procedure C was applied to geraniol (**1c**, 67.7 mg, 0.439 mmol). The crude product was purified by flash chromatography on silica gel (PE/EtOAc 100/0 → 70/30) to afford **4c** (54.8 mg, 50%) as a colorless oil. The chemical shifts of the product are in accordance with literature.<sup>5</sup>

**NMR <sup>1</sup>H (300 MHz, CDCl<sub>3</sub>):** δ = 5.46 (tq, *J* = 6.8, 1.1 Hz, 1H, =CH), 4.15 (d, *J* = 6.8 Hz, 2H, CH<sub>2</sub>-OH), 3.95 (dd, *J* = 11.3, 1.9 Hz, 1H, CH-Br), 2.44–2.35 (m, 1H, CH<sub>2</sub>), 2.21–2.10 (m, 1H, CH<sub>2</sub>), 2.09–1.99 (m, 1H, CH<sub>2</sub>), 1.89–1.78 (m, 1H, CH<sub>2</sub>), 1.68 (s, 3H, CH<sub>3</sub>-C=C), 1.35 (s, 3H, CH<sub>3</sub>), 1.34 (s, 3H, CH<sub>3</sub>).

**NMR <sup>13</sup>C (75 MHz, CDCl<sub>3</sub>):** δ = 137.8 (C<sub>q</sub>), 124.7 (CH), 72.5 (C<sub>q</sub>), 70.1 (CH-Br), 59.2 (OCH<sub>2</sub>), 38.0 (CH<sub>2</sub>), 31.8 (CH<sub>2</sub>), 26.5 (CH<sub>3</sub>), 26.1 (CH<sub>3</sub>), 16.2 (CH<sub>3</sub>).

**IR (cm<sup>-1</sup>):** 3384, 2975, 2933, 1728, 1652, 1456, 1379, 1219, 1129, 1063, 913, 776.

**(*E*)-*N*-(6-Bromo-7-hydroxy-3,7-dimethyloct-2-en-1-yl)-4-methylbenzenesulfonamide (4d)**

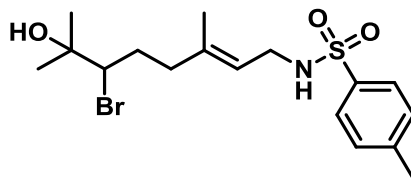

C<sub>17</sub>H<sub>26</sub>BrNO<sub>3</sub>S, 404.3630 g/mol

General procedure C was applied to *N*-tosyl geranylamine (**1d**, 50.3 mg, 0.164 mmol). The crude residue was purified by flash chromatography on silica gel (PE/EtOAc 100/0 → 80/20 → 70/30) to afford **4d** (17.5 mg, 27%) as a colorless oil.

<sup>5</sup> T. Hoshino, A. Chiba, N. Abe, *Chem. Eur. J.* **2012**, *18*, 13108 – 13116.

**NMR  $^1\text{H}$  (300 MHz,  $\text{CDCl}_3$ ):**  $\delta$  = 7.76 (d,  $J$  = 8.0 Hz, 2H,  $\text{CH}_{\text{Ar}}$ ), 7.32 (d,  $J$  = 8.0 Hz, 2H,  $\text{CH}_{\text{Ar}}$ ), 5.13 (bt,  $J$  = 7.0 Hz, 1H, =CH), 4.51 (bs, 1H, NH), 3.88 (d,  $J$  = 11.3 Hz, 1H, CH-Br), 3.56 (bt,  $J$  = 6.0 Hz, 2H,  $\text{CH}_2\text{-NHTs}$ ), 2.45 (s, 3H,  $\text{CH}_3\text{-Ar}$ ), 2.34–2.25 (m, 1H,  $\text{CH}_2$ ), 2.11–2.01 (m, 1H,  $\text{CH}_2$ ), 1.98–1.91 (m, 1H,  $\text{CH}_2$ ), 1.80–1.66 (m, 1H,  $\text{CH}_2$ ), 1.57 (s, 3H,  $\text{CH}_3\text{-C=C}$ ), 1.34 (s, 6H,  $\text{CH}_3$ ).

**NMR  $^{13}\text{C}$  (75 MHz,  $\text{CDCl}_3$ ):**  $\delta$  = 143.4 ( $\text{C}_q$ ), 139.2 ( $\text{C}_q$ ), 137.0 ( $\text{C}_q$ ), 129.7 (2CH), 127.2 (2CH), 120.1 (CH), 72.5 ( $\text{C}_q$ ), 69.9 (CH-Br), 40.9 (NH $\text{CH}_2$ ), 37.9 ( $\text{CH}_2$ ), 31.6 ( $\text{CH}_2$ ), 26.4 ( $\text{CH}_3$ ), 26.1 ( $\text{CH}_3$ ), 21.6 ( $\text{CH}_3$ ), 16.2 ( $\text{CH}_3$ ).

**HRMS (ESI):**  $m/z$  calcd for  $\text{C}_{17}\text{H}_{26}^{79}\text{BrNNaO}_3\text{S}^+$ ,  $[\text{M}+\text{Na}]^+$  426.0709, found 426.0711.  
 $m/z$  calcd for  $\text{C}_{19}\text{H}_{29}^{79}\text{BrN}_2\text{NaO}_3\text{S}^+$ ,  $[\text{M}+\text{CH}_3\text{CN}+\text{Na}]^+$  467.0974, found 467.0972.  
 $m/z$  calcd for  $\text{C}_{17}\text{H}_{26}^{81}\text{BrNNaO}_3\text{S}^+$ ,  $[\text{M}+\text{Na}]^+$  428.0688, found 428.0698.  
 $m/z$  calcd for  $\text{C}_{19}\text{H}_{29}^{81}\text{BrN}_2\text{NaO}_3\text{S}^+$ ,  $[\text{M}+\text{CH}_3\text{CN}+\text{Na}]^+$  469.0954, found 469.0963.

**IR ( $\text{cm}^{-1}$ ):** 3491, 3268, 2976, 2926, 1599, 1430, 1321, 1154, 1093, 1043, 907, 814, 731, 662.

### 3-Bromo-2-methyl-6-methyleneoct-7-en-2-ol (**4e**)

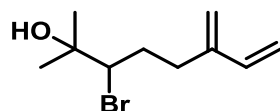

$\text{C}_{10}\text{H}_{17}\text{BrO}$ , 233.1490 g/mol

General procedure C was applied to myrcene (**1e**, 50.6 mg, 0.371 mmol). The crude residue was purified by flash chromatography on silica gel (PE/EtOAc 100/0  $\rightarrow$  95/5) to afford **4e** (18.5 mg, 21%) as a colorless oil. *Caution is to be taken since this product is volatile.*

**NMR  $^1\text{H}$  (300 MHz,  $\text{CDCl}_3$ ):**  $\delta$  = 6.34 (dd,  $J$  = 17.7, 10.7 Hz, 1H,  $\text{CH}=\text{CH}_2$ ), 5.26 (d,  $J$  = 17.7 Hz, 1H,  $\text{CH}_2=\text{CH}$ ), 5.13 (d,  $J$  = 10.7 Hz, 1H,  $\text{CH}_2=\text{CH}$ ), 5.09 (s, 2H,  $\text{CH}_2=\text{C}$ ), 4.04 (dd,  $J$  = 11.2, 1.6 Hz, 1H, CH-Br), 2.73–2.64 (m, 1H,  $\text{CH}_2$ ), 2.38–2.28 (m, 1H,  $\text{CH}_2$ ), 2.14–2.03 (m, 1H,  $\text{CH}_2$ ), 1.99–1.86 (m, 1H,  $\text{CH}_2$ ), 1.36 (s, 3H,  $\text{CH}_3$ ), 1.35 (s, 3H,  $\text{CH}_3$ ).

**NMR  $^{13}\text{C}$  (75 MHz,  $\text{CDCl}_3$ ):**  $\delta$  = 144.8 ( $\text{C}_q$ ), 138.3 (CH), 116.9 ( $\text{CH}_2$ ), 113.8 ( $\text{CH}_2$ ), 72.5 ( $\text{C}_q$ ), 71.0 (CH-Br), 32.7 ( $\text{CH}_2$ ), 30.4 ( $\text{CH}_2$ ), 26.7 ( $\text{CH}_3$ ), 25.8 ( $\text{CH}_3$ ).

**HRMS (ESI):** no ionization could be observed for this compound.

**IR ( $\text{cm}^{-1}$ ):** 3430, 2977, 2931, 1595, 1460, 1367, 1221, 1157, 1115, 992, 897, 791.

## 6. Procedures and analytical data for trifluoroacetoxy-iodination products

### (E)-8-Acetoxy-3-iodo-2,6-dimethyloct-6-en-2-yl 2,2,2-trifluoroacetate (5a)

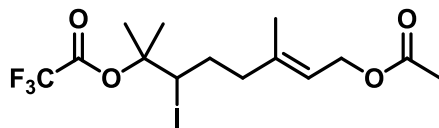

C<sub>14</sub>H<sub>20</sub>F<sub>3</sub>I O<sub>4</sub>, 436.2097 g/mol

General procedure D was applied to geranyl acetate (**1a**, 51.2 mg, 0.261 mmol). The crude residue was purified by flash column chromatography (PE/EtOAc 100/0 → 95/5) to afford **5a** (80 mg, 70%) as a colorless oil.

**NMR** <sup>1</sup>H (300 MHz, CDCl<sub>3</sub>): δ = 5.43 (tq, *J* = 7.0, 1.2 Hz, 1H, =CH), 4.60 (d, *J* = 7.0 Hz, 2H, CH<sub>2</sub>-OAc), 4.48 (dd, *J* = 10.5, 3.0 Hz, 1H, CH-I), 2.46–2.37 (m, 1H, CH<sub>2</sub>), 2.21–2.11 (m, 1H, CH<sub>2</sub>), 2.07 (s, 3H, Ac), 1.94 (d, *J* = 5.3 Hz, 1H, CH<sub>2</sub>), 1.88–1.80 (m, 1H, CH<sub>2</sub>), 1.77 (s, 3H, CH<sub>3</sub>), 1.76 (s, 3H, CH<sub>3</sub>), 1.71 (bs, 3H, CH<sub>3</sub>-C=C).

**NMR** <sup>13</sup>C (75 MHz, CDCl<sub>3</sub>): δ = 171.0 (C=O), 155.8 (q, *J* = 42.3 Hz, CF<sub>3</sub>C=O), 139.5 (C<sub>q</sub>), 120.4 (CH), 114.1 (q, *J* = 287 Hz, CF<sub>3</sub>), 89.3 (C<sub>q</sub>), 61.0 (OCH<sub>2</sub>), 41.6 (CH-I), 39.1 (CH<sub>2</sub>), 32.5 (CH<sub>2</sub>), 25.7 (CH<sub>3</sub>), 22.8 (CH<sub>3</sub>), 21.0 (CH<sub>3</sub>), 16.2 (CH<sub>3</sub>).

**NMR** <sup>19</sup>F (300 Hz, CDCl<sub>3</sub>): δ = -75.5.

**HRMS (ESI):** m/z calcd for C<sub>14</sub>H<sub>20</sub>F<sub>3</sub>INaO<sub>4</sub><sup>+</sup>, [M+Na]<sup>+</sup> 459.0250, found 459.0252.  
m/z calcd for C<sub>16</sub>H<sub>23</sub>F<sub>3</sub>INNaO<sub>4</sub><sup>+</sup>, [M+CH<sub>3</sub>CN+Na]<sup>+</sup> 500.0515, found 500.0511.

**IR (cm<sup>-1</sup>):** 2989, 2944, 1779, 1736, 1445, 1367, 1218, 1159, 1113, 1023, 957, 870, 850, 774, 730.

### (Z)-8-Acetoxy-3-iodo-2,6-dimethyloct-6-en-2-yl 2,2,2-trifluoroacetate (5b)

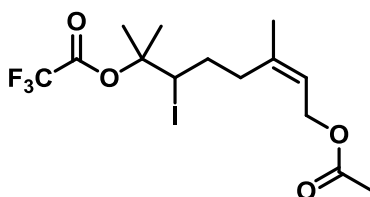

C<sub>14</sub>H<sub>20</sub>F<sub>3</sub>I O<sub>4</sub>, 436.2097 g/mol

General procedure D was applied to neryl acetate (**1b**, 57.2 mg, 0.291 mmol). The crude residue was purified by flash column chromatography (PE/EtOAc 100/0 → 95/05) to afford **5b** (77.8 mg, 61%) as a colorless oil.

**NMR** <sup>1</sup>H (300 MHz, C<sub>6</sub>D<sub>6</sub>): δ = 5.35 (bt, *J* = 7.3 Hz, 1H, =CH), 4.62 (d, *J* = 7.3 Hz, 2H, CH<sub>2</sub>-OAc), 4.25 (dd, *J* = 10.5, 3.0 Hz, 1H, CH-I), 2.13–2.04 (m, 2H, CH<sub>2</sub>), 1.73 (s, 3H, Ac), 1.52–1.48 (m, 1H, CH<sub>2</sub>), 1.47 (s, 3H, CH<sub>3</sub>-C=C), 1.45–1.40 (m, 1H, CH<sub>2</sub>), 1.34 (s, 3H, CH<sub>3</sub>), 1.31 (s, 3H, CH<sub>3</sub>).

**NMR  $^{13}\text{C}$  (75 MHz,  $\text{C}_6\text{D}_6$ ):**  $\delta = 169.9$  (C=O), 155.8 (q,  $J = 41.7$  Hz,  $\text{CF}_3\text{C}=\text{O}$ ), 139.4 ( $\text{C}_q$ ), 122.1 (CH), 114.8 (q,  $J = 287$  Hz,  $\text{CF}_3$ ), 89.1 ( $\text{C}_q$ ), 60.7 ( $\text{OCH}_2$ ), 42.0 (CH-I), 33.2 ( $\text{CH}_2$ ), 31.9 ( $\text{CH}_2$ ), 25.1 ( $\text{CH}_3$ ), 22.8 ( $\text{CH}_3$ ), 22.2 ( $\text{CH}_3$ ), 20.5 ( $\text{CH}_3$ ).

**NMR  $^{19}\text{F}$  (300 Hz,  $\text{C}_6\text{D}_6$ ):**  $\delta = -75.4$ .

**HRMS (ESI):**  $m/z$  calcd for  $\text{C}_{14}\text{H}_{20}\text{F}_3\text{I}\text{NaO}_4^+$ ,  $[\text{M}+\text{Na}]^+$  459.0250, found 459.0250.

$m/z$  calcd for  $\text{C}_{16}\text{H}_{23}\text{F}_3\text{I}\text{NNaO}_4^+$ ,  $[\text{M}+\text{CH}_3\text{CN}+\text{Na}]^+$  500.0515, found 500.0529.

**IR ( $\text{cm}^{-1}$ ):** 2942, 1779, 1737, 1445, 1366, 1218, 1158, 1111, 1022, 956, 870, 850, 774, 729.

**(E)-8-Hydroxy-3-iodo-2,6-dimethyloct-6-en-2-yl 2,2,2-trifluoroacetate (5c)**

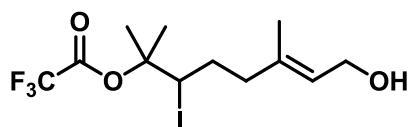

$\text{C}_{12}\text{H}_{18}\text{F}_3\text{IO}_3$ , 394.1727 g/mol

General procedure D was applied to geraniol (**1c**, 60.4 mg, 0.392 mmol). The crude residue was purified by flash column chromatography (PE/EtOAc 100/0  $\rightarrow$  80/20) to afford **5c** (35.5 mg, 23%) as a colorless oil.

**NMR  $^1\text{H}$  (300 MHz,  $\text{C}_6\text{D}_6$ ):**  $\delta = 5.39$  (bt,  $J = 6.6$  Hz, =CH), 4.37 (dd,  $J = 11.3, 2.3$  Hz, 1H, CH-I), 3.91 (d,  $J = 6.6$  Hz, 2H,  $\text{CH}_2\text{-OH}$ ), 2.15–2.06 (m, 1H,  $\text{CH}_2$ ), 1.95–1.82 (m, 1H,  $\text{CH}_2$ ), 1.49 (d,  $J = 4.1$  Hz, 1H,  $\text{CH}_2$ ), 1.47–1.38 (m, 1H,  $\text{CH}_2$ ), 1.36 (s, 3H,  $\text{CH}_3\text{-C}=\text{C}$ ), 1.34 (s, 3H,  $\text{CH}_3$ ), 1.29 (s, 3H,  $\text{CH}_3$ ).

**NMR  $^{13}\text{C}$  (75 MHz,  $\text{C}_6\text{D}_6$ ):**  $\delta = 155.9$  (q,  $J = 41.7$  Hz,  $\text{CF}_3\text{C}=\text{O}$ ), 135.6 ( $\text{C}_q$ ), 126.6 (CH), 114.8 (q,  $J = 287$  Hz,  $\text{CF}_3$ ), 89.4 ( $\text{C}_q$ ), 59.0 ( $\text{OCH}_2$ ), 41.8 (CH-I), 39.0 ( $\text{CH}_2$ ), 32.6 ( $\text{CH}_2$ ), 25.2 ( $\text{CH}_3$ ), 22.3 ( $\text{CH}_3$ ), 15.7 ( $\text{CH}_3$ ).

**NMR  $^{19}\text{F}$  (300 Hz,  $\text{C}_6\text{D}_6$ ):**  $\delta = -75.4$ .

**HRMS (ESI):**  $m/z$  calcd for  $\text{C}_{14}\text{H}_{21}\text{F}_3\text{I}\text{NNaO}_3^+$ ,  $[\text{M}+\text{CH}_3\text{CN}+\text{Na}]^+$  458.0411, found 458.0413.

**IR ( $\text{cm}^{-1}$ ):** 3320, 2922, 1778, 1670, 1444, 1367, 1218, 1159, 1111, 1000, 869, 846, 774, 729.

**(E)-3-Iodo-2,6-dimethyl-8-((4-methylphenyl)sulfonamido)oct-6-en-2-yl 2,2,2-trifluoroacetate (5d)**

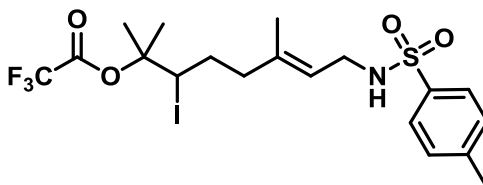

$\text{C}_{19}\text{H}_{25}\text{F}_3\text{INO}_4\text{S}$ , 547.3717 g/mol

General procedure D was applied to *N*-tosyl geranylamine (**1d**, 57.9 mg, 0.188 mmol). The crude residue was purified by flash chromatography on silica gel (PE/EtOAc 100/0  $\rightarrow$  80/20) to afford **5d** (59 mg, 57%) as a colorless oil.

**NMR <sup>1</sup>H (300 MHz, C<sub>6</sub>D<sub>6</sub>):** δ = 7.83 (d, *J* = 8.1 Hz, 2H, CH<sub>Ar</sub>), 6.83 (d, *J* = 8.1 Hz, 2H, CH<sub>Ar</sub>), 5.00 (bt, *J* = 7.0 Hz, 1H, =CH), 4.92 (bt, *J* = 5.7 Hz 1H, NH), 4.29 (dd, *J* = 11.2, 2.2 Hz, 1H, CH-I), 3.44 (bs, 2H, CH<sub>2</sub>-NHTs), 2.01–1.90 (m, 1H, CH<sub>2</sub>), 1.93 (s, 3H, CH<sub>3</sub>-Ar), 1.78–1.65 (m, 1H, CH<sub>2</sub>), 1.50 (d, *J* = 3.0 Hz, 1H, CH<sub>2</sub>), 1.43–1.37 (m, 1H, CH<sub>2</sub>), 1.35 (s, 3H, CH<sub>3</sub>), 1.32 (s, 3H, CH<sub>3</sub>), 1.23 (s, 3H, CH<sub>3</sub>-C=C).

**NMR <sup>13</sup>C (75 MHz, C<sub>6</sub>D<sub>6</sub>):** δ = 155.9 (q, *J* = 41.2 Hz, CF<sub>3</sub>C=O), 142.9 (C<sub>q</sub>), 138.3 (C<sub>q</sub>), 137.8 (C<sub>q</sub>), 129.6 (2CH), 127.5 (2CH), 121.4 (CH), 114.8 (q, *J* = 287.6 Hz, CF<sub>3</sub>), 89.4 (C<sub>q</sub>), 42.1 (CH-I), 40.9 (NHCH<sub>2</sub>), 38.9 (CH<sub>2</sub>), 32.5 (CH<sub>2</sub>), 25.1 (CH<sub>3</sub>), 22.4 (CH<sub>3</sub>), 21.1 (CH<sub>3</sub>), 15.7 (CH<sub>3</sub>).

**NMR <sup>19</sup>F (300 Hz):** δ = -75.4.

**HRMS (ESI):** *m/z* calcd for C<sub>19</sub>H<sub>25</sub>F<sub>3</sub>INNaO<sub>4</sub>S<sup>+</sup>, [M+Na]<sup>+</sup> 570.0393, found 570.0399.

*m/z* calcd for C<sub>21</sub>H<sub>28</sub>F<sub>3</sub>IN<sub>2</sub>NaO<sub>4</sub>S<sup>+</sup>, [M+CH<sub>3</sub>CN+Na]<sup>+</sup> 611.0659, found 611.0665.

**IR (cm<sup>-1</sup>):** 3278, 2925, 1778, 1369, 1327, 1218, 1157, 1094, 1043, 814, 774, 663.

### **3-Iodo-2-methyl-6-methyleneoct-7-en-2-yl 2,2,2-trifluoroacetate (5e)**

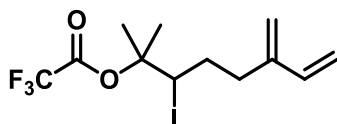

C<sub>12</sub>H<sub>16</sub>F<sub>3</sub>IO<sub>2</sub>, 376.1577 g/mol

General procedure D was applied to myrcene (**1e**, 59.3 mg, 0.4353 mmol). The crude residue was purified by flash chromatography on silica gel (PE 100%) to afford **5e** (80.5 mg, 49%) as a colorless oil. *Caution is to be taken since this product is volatile.*

**NMR <sup>1</sup>H (300 MHz, C<sub>6</sub>D<sub>6</sub>):** δ = 6.17 (dd, *J* = 17.7, 10.9 Hz, 1H, CH=CH<sub>2</sub>), 5.07 (d, *J* = 17.7 Hz, 1H, CH<sub>2</sub>=CH), 4.96 (d, *J* = 10.9 Hz, 1H, CH<sub>2</sub>=CH), 4.94 (bs, 2H, CH<sub>2</sub>=C), 4.36 (dd, *J* = 10.9, 2.4 Hz, 1H, CH-I), 2.50–2.41 (m, 1H, CH<sub>2</sub>), 2.11–2.01 (m, 1H, CH<sub>2</sub>), 1.58–1.49 (m, 2H, CH<sub>2</sub>), 1.44 (d, *J* = 3.6 Hz, 1H, CH<sub>2</sub>), 1.30 (s, 3H, CH<sub>3</sub>), 1.24 (s, 3H, CH<sub>3</sub>).

**NMR <sup>13</sup>C (75 MHz, C<sub>6</sub>D<sub>6</sub>):** δ = 155.8 (q, *J* = 41.2 Hz, CF<sub>3</sub>C=O), 144.4 (C<sub>q</sub>), 138.3 (CH), 117.4 (CH<sub>2</sub>), 113.8 (CH<sub>2</sub>), 114.8 (q, *J* = 287 Hz, CF<sub>3</sub>), 89.1 (C<sub>q</sub>), 42.2 (CH-I), 33.5 (CH<sub>2</sub>), 31.7 (CH<sub>2</sub>), 25.1 (CH<sub>3</sub>), 22.3 (CH<sub>3</sub>).

**NMR <sup>19</sup>F (300 Hz, C<sub>6</sub>D<sub>6</sub>):** δ = -75.4.

**HRMS (ESI):** no ionization could be observed for this compound.

**IR (cm<sup>-1</sup>):** 2943, 1778, 1596, 1459, 1367, 1218, 1159, 1113, 992, 901, 870, 774, 731.

## 7. Procedures and analytical data for allylic-chlorination products

### (E)-6-Chloro-3,7-dimethylocta-2,7-dien-1-yl acetate (**6a**)

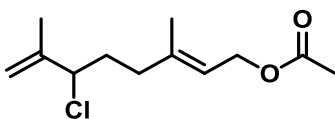

$C_{12}H_{19}ClO_2$ , 230.732 g/mol

General procedure E was applied to geranyl acetate (**1a**, 47.1 mg, 0.240 mmol). The crude product was purified by flash chromatography on silica gel (PE/AcOEt 100/0 → 98/02) to afford **6a** (47 mg, 85%) as a colorless oil. The chemical shifts of the product are in accordance with literature.<sup>6</sup>

**NMR  $^1H$  (300 MHz,  $CDCl_3$ ):**  $\delta$  = 5.28 (tq,  $J$  = 7.0, 1.3 Hz, 1H, CH=C), 4.94 (m, 1H, CH<sub>2</sub>=C), 4.83 (p,  $J$  = 1.4 Hz, 1H, CH<sub>2</sub>=C), 4.51 (d,  $J$  = 7.0 Hz, 2H, CH<sub>2</sub>-OAc), 4.25 (t,  $J$  = 7.0 Hz, 1H, CH-Cl), 2.13–2.01 (m, 2H, CH<sub>2</sub>), 1.99 (s, 3H, Ac), 1.96–1.82 (m, 2H, CH<sub>2</sub>), 1.74 (s, 3H, CH<sub>3</sub>-C=CH<sub>2</sub>), 1.64 (s, 3H, CH<sub>3</sub>-C=CH).

**NMR  $^{13}C$  (75 MHz,  $CDCl_3$ ):**  $\delta$  = 171.0 (C=O), 144.2 (C<sub>q</sub>), 140.5 (C<sub>q</sub>), 119.4 (CH), 114.3 (CH<sub>2</sub>), 66.1 (CH-Cl), 61.2 (OCH<sub>2</sub>), 36.5 (CH<sub>2</sub>), 34.4 (CH<sub>2</sub>), 21.0 (CH<sub>3</sub>), 17.0 (CH<sub>3</sub>), 16.5 (CH<sub>3</sub>).

**HRMS (ESI):**  $m/z$  calcd for  $C_{10}H_{16}Cl^+$ ,  $[M-OAc]^+$  171,0935, found 171,0942.

**IR (cm<sup>-1</sup>):** 2950, 1737, 1443, 1366, 1229, 1022, 955, 907, 791, 678.

### (Z)-6-Chloro-3,7-dimethylocta-2,7-dien-1-yl acetate (**6b**)

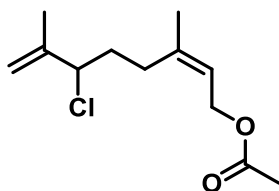

$C_{12}H_{19}ClO_2$ , 230.732 g/mol

General procedure E was applied to neryl acetate (**1b**, 61 mg, 0.311 mmol). The crude residue was purified by flash chromatography on silica gel (PE/EtOAc 100/0 → 98/02) to afford **6b** (55 mg, 76%) as a colorless oil. The chemical shifts of the product are in accordance with literature.<sup>7</sup>

**NMR  $^1H$  (300 MHz,  $CDCl_3$ ):**  $\delta$  = 5.44 (bt,  $J$  = 7.2 Hz, 1H, CH=C), 5.07 (bs, 1H, CH<sub>2</sub>=C), 4.96 (bt,  $J$  = 1.4 Hz, 1H, CH<sub>2</sub>=C), 4.61 (d,  $J$  = 7.2 Hz, 2H, CH<sub>2</sub>-OAc), 4.36 (dd,  $J$  = 8.1, 6.3 Hz, 1H, CH-Cl), 2.26–2.20 (m, 2H, CH<sub>2</sub>), 2.09 (s, 3H, Ac), 2.02–1.92 (m, 2H, CH<sub>2</sub>), 1.86 (s, 3H, CH<sub>3</sub>-C=CH<sub>2</sub>), 1.81 (s, 3H, CH<sub>3</sub>-C=CH).

**NMR  $^{13}C$  (75 MHz,  $CDCl_3$ ):**  $\delta$  = 171.0 (C=O), 144.2 (C<sub>q</sub>), 141.0 (C<sub>q</sub>), 120.4 (CH), 114.4 (CH<sub>2</sub>), 66.1 (CH-Cl), 60.9 (OCH<sub>2</sub>), 34.8 (CH<sub>2</sub>), 29.3 (CH<sub>2</sub>), 23.3 (CH<sub>3</sub>), 21.1 (CH<sub>3</sub>), 17.1 (CH<sub>3</sub>).

**HRMS (ESI):**  $m/z$  calcd for  $C_{10}H_{16}Cl^+$ ,  $[M-OAc]^+$  171,0935, found 171,0938.

<sup>6</sup> V. P. Demertzidou, S. Pappa, V. Sarli, A. L. Zografos, *J. Org. Chem.* **2017**, *82*, 8710–8715.

<sup>7</sup> L. Novák, L. Poppe, C. Szántay, É. Szabó, *Synthesis*, **1985**, *10*, 939–941.

IR (cm<sup>-1</sup>): 2951, 1736, 1445, 1377, 1229, 1021, 956, 907, 810.

**(E)-6-Chloro-3,7-dimethylocta-2,7-dien-1-ol (6c)**

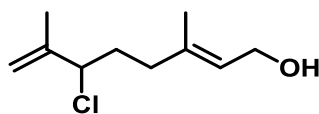

C<sub>10</sub>H<sub>17</sub>ClO, 188.6950 g/mol

General procedure E was applied to geraniol (**1c**, 65 mg, 0.421 mmol). The crude product was purified by flash chromatography on silica gel (PE/AcOEt 100/0 → 80/20) to afford **6c** (40.3 mg, 51%) as a colorless oil. The chemical shifts of the product are in accordance with literature.<sup>8</sup>

**NMR** <sup>1</sup>H (300 MHz, CDCl<sub>3</sub>): δ = 5.44 (bt, *J* = 6.8 Hz, 1H, CH=C), 5.03 (s, 1H, CH<sub>2</sub>=C), 4.93 (s, 1H, CH<sub>2</sub>=C), 4.35 (t, *J* = 7.0 Hz, 1H, CH-Cl), 4.17 (bd, *J* = 6.8 Hz, 2H, CH<sub>2</sub>-OH), 2.17–1.91 (m, 4H, CH<sub>2</sub>), 1.83 (s, 3H, CH<sub>3</sub>-C=CH<sub>2</sub>), 1.70 (s, 3H, CH<sub>3</sub>-C=CH).

**NMR** <sup>13</sup>C (75 MHz, CDCl<sub>3</sub>): δ = 144.2 (C<sub>q</sub>), 138.0 (C<sub>q</sub>), 124.4 (CH), 114.3 (CH<sub>2</sub>), 66.2 (CH-Cl), 59.3 (OCH<sub>2</sub>), 36.5 (CH<sub>2</sub>), 34.6 (CH<sub>2</sub>), 17.0 (CH<sub>3</sub>), 16.3 (CH<sub>3</sub>).

**HRMS** (ESI): *m/z* calcd for C<sub>20</sub>H<sub>34</sub>Cl<sub>2</sub>NaO<sub>2</sub><sup>+</sup>, [2M+Na]<sup>+</sup> 399.1828, found 399.1831.

IR (cm<sup>-1</sup>): 3320, 2948, 2919, 2860, 1441, 1376, 1370, 1222, 1166, 997, 905, 790.

**(E)-N-(6-Chloro-3,7-dimethylocta-2,7-dien-1-yl)-4-methylbenzenesulfonamide (6d)**

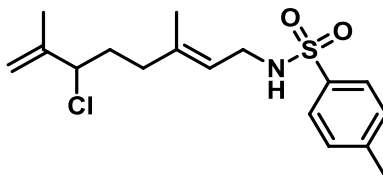

C<sub>17</sub>H<sub>24</sub>ClNO<sub>2</sub>S, 341.894 g/mol

General procedure E was applied to *N*-tosyl geranylamine (**1d**, 54 mg, 0.176 mmol). The crude residue was purified by flash chromatography on silica gel (PE/EtOAc 100/0 → 85/15) and the collected fraction was purified by preparative TLC (Heptane/EtOAc 85/15) to afford **6d** (36.1 mg, 60%) as a colorless oil.

**NMR** <sup>1</sup>H (300 MHz, CDCl<sub>3</sub>): δ = 7.77 (d, *J* = 8.0 Hz, 2H, CH<sub>Ar</sub>), 7.33 (d, *J* = 8.0 Hz, 2H, CH<sub>Ar</sub>), 5.08 (bt, *J* = 7.0 Hz, 1H, CH=C), 4.99 (bs, 1H, CH<sub>2</sub>=C), 4.91 (t, *J* = 1.3 Hz, 1H, CH<sub>2</sub>=C), 4.52 (bs, 1H, NH), 4.27 (t, *J* = 7.0 Hz, 1H, CH-Cl), 3.59 (t, *J* = 5.7 Hz, 2H, CH<sub>2</sub>-NHTs), 2.46 (s, 3H, CH<sub>3</sub>-Ar), 2.06–1.95 (m, 2H, CH<sub>2</sub>), 1.88–1.81 (m, 2H, CH<sub>2</sub>), 1.80 (s, 3H, CH<sub>3</sub>-C=CH<sub>2</sub>), 1.58 (s, 3H, CH<sub>3</sub>-C=CH).

<sup>8</sup> L. Novák, L. Poppe, C. Szántay, É. Szabó, *Synthesis*, **1985**, *10*, 939–941.



**NMR  $^{13}\text{C}$  (75 MHz,  $\text{CDCl}_3$ ):**  $\delta$  = 144.1 ( $\text{C}_q$ ), 143.5 ( $\text{C}_q$ ), 139.3 ( $\text{C}_q$ ), 137.1 ( $\text{C}_q$ ), 129.7 (2CH), 127.2 (2CH), 119.8 (CH), 114.4 ( $\text{CH}_2$ ), 66.1 (CH-Cl), 40.9 ( $\text{CH}_2$ ), 36.3 ( $\text{CH}_2$ ), 34.4 ( $\text{CH}_2$ ), 21.6 ( $\text{CH}_3$ ), 17.0 ( $\text{CH}_3$ ), 16.3 ( $\text{CH}_3$ ).

**HRMS (ESI):**  $m/z$  calcd for  $\text{C}_{17}\text{H}_{25}\text{ClNO}_2\text{S}^+$ ,  $[\text{M}+\text{H}]^+$  342.1289, found 342.1274  
 $m/z$  calcd for  $\text{C}_{19}\text{H}_{27}\text{ClN}_2\text{NaO}_2\text{S}^+$ ,  $[\text{M}+\text{CH}_3\text{CN}+\text{Na}]^+$  405.1374, found 405.1393  
 $m/z$  calcd for  $\text{C}_{34}\text{H}_{49}\text{Cl}_2\text{N}_2\text{O}_4\text{S}_2^+$ ,  $[2\text{M}+\text{H}]^+$  683.2505, found 683.2504

**IR ( $\text{cm}^{-1}$ ):** 3280, 2923, 1435, 1325, 1156, 1093, 1044, 907, 814, 662.

### **3-Chloro-2-methyl-6-methyleneocta-1,7-diene (6e)**

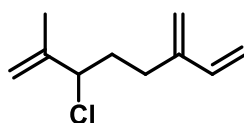

$\text{C}_{10}\text{H}_{15}\text{Cl}$ , 170.680 g/mol

General procedure E was applied to myrcene (**1e**, 63 mg, 0.463 mmol). The crude residue was purified by flash chromatography on silica gel (PE 100%) to afford **6e** (45.2 mg, 57%) as a colorless oil. The chemical shifts of the product are in accordance with literature.<sup>9</sup> *Caution is to be taken since this product is volatile.*

**NMR  $^1\text{H}$  (300 MHz,  $\text{CDCl}_3$ ):**  $\delta$  = 6.34 (dd,  $J$  = 17.7, 10.7 Hz, 1H,  $\text{CH}=\text{CH}_2$ ), 5.23 (d,  $J$  = 17.7 Hz, 1H,  $\text{CH}_2=\text{CH}$ ), 5.12–5.05 (m, 4H,  $\text{CH}_2=\text{CH}$ ,  $\text{CH}_2=\text{C}$ ,  $\text{CH}_2=\text{CCH}_3$ ), 4.93 (bt,  $J$  = 1.5 Hz, 1H,  $\text{CH}_2=\text{CCH}_3$ ), 4.40 (dd,  $J$  = 8.0, 6.3 Hz, 1H, CH-Cl), 2.47–2.37 (m, 1H,  $\text{CH}_2$ ), 2.33–2.22 (m, 1H,  $\text{CH}_2$ ), 2.10–1.98 (m, 2H,  $\text{CH}_2$ ), 1.85 (s, 3H,  $\text{CH}_3$ ).

**NMR  $^{13}\text{C}$  (75 MHz,  $\text{CDCl}_3$ ):**  $\delta$  = 144.9 ( $\text{C}_q$ ), 144.4 ( $\text{C}_q$ ), 138.5 (CH), 116.5 ( $\text{CH}_2$ ), 114.2 ( $\text{CH}_2$ ), 113.6 ( $\text{CH}_2$ ), 66.4 (CH-Cl), 35.1 ( $\text{CH}_2$ ), 28.6 ( $\text{CH}_2$ ), 17.2 ( $\text{CH}_3$ ).

**HRMS (ESI):** no ionization could be observed for this compound.

**IR ( $\text{cm}^{-1}$ ):** 2955, 1646, 1595, 1448, 1376, 991, 898, 796.

<sup>9</sup> J. A. Tunge; S. R. Mellegaard; *Org. Lett.* **2004**, *6*, 1205–1207.

8. Copies of  $^1\text{H}$  and  $^{13}\text{C}$  NMR spectra for starting materials  
*(E)*-*N*-(3,7-Dimethylocta-2,6-dien-1-yl)-4-methylbenzenesulfonamide (**1d**)

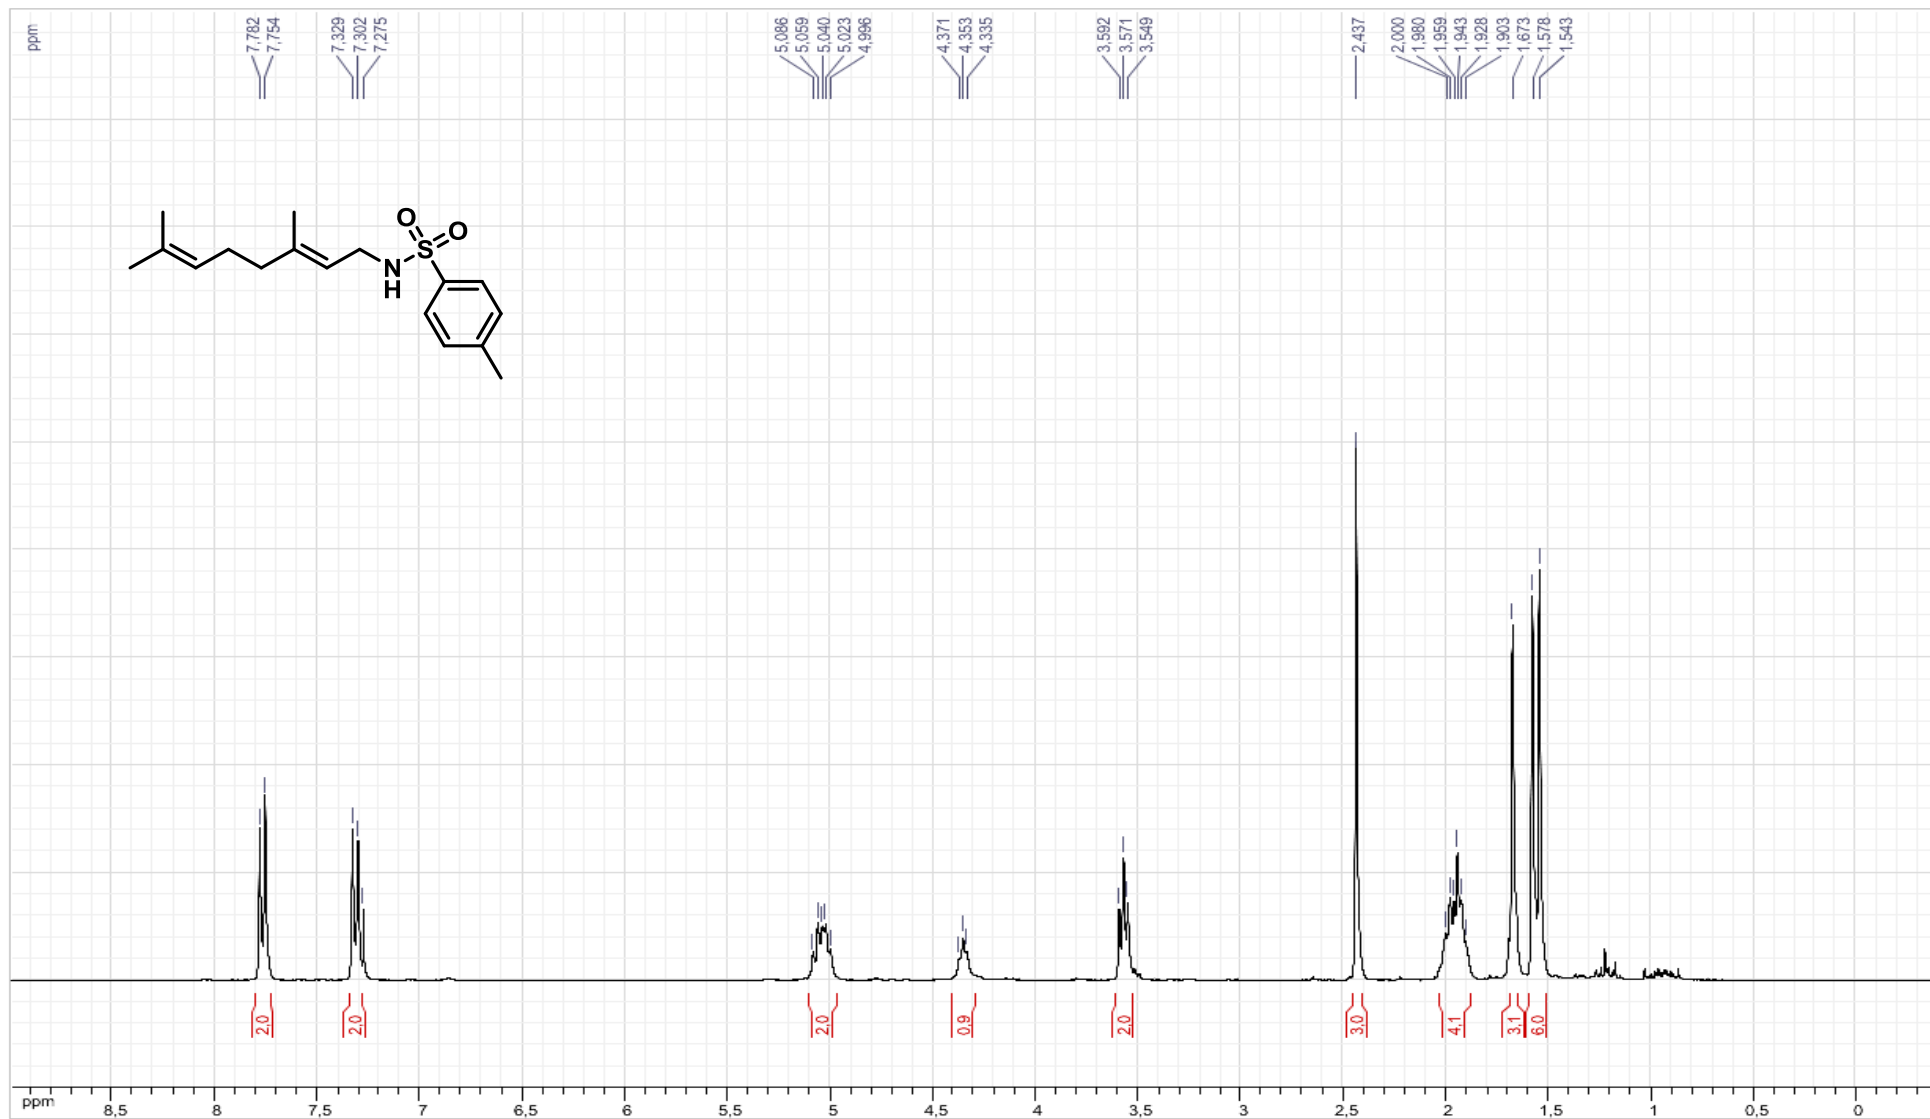

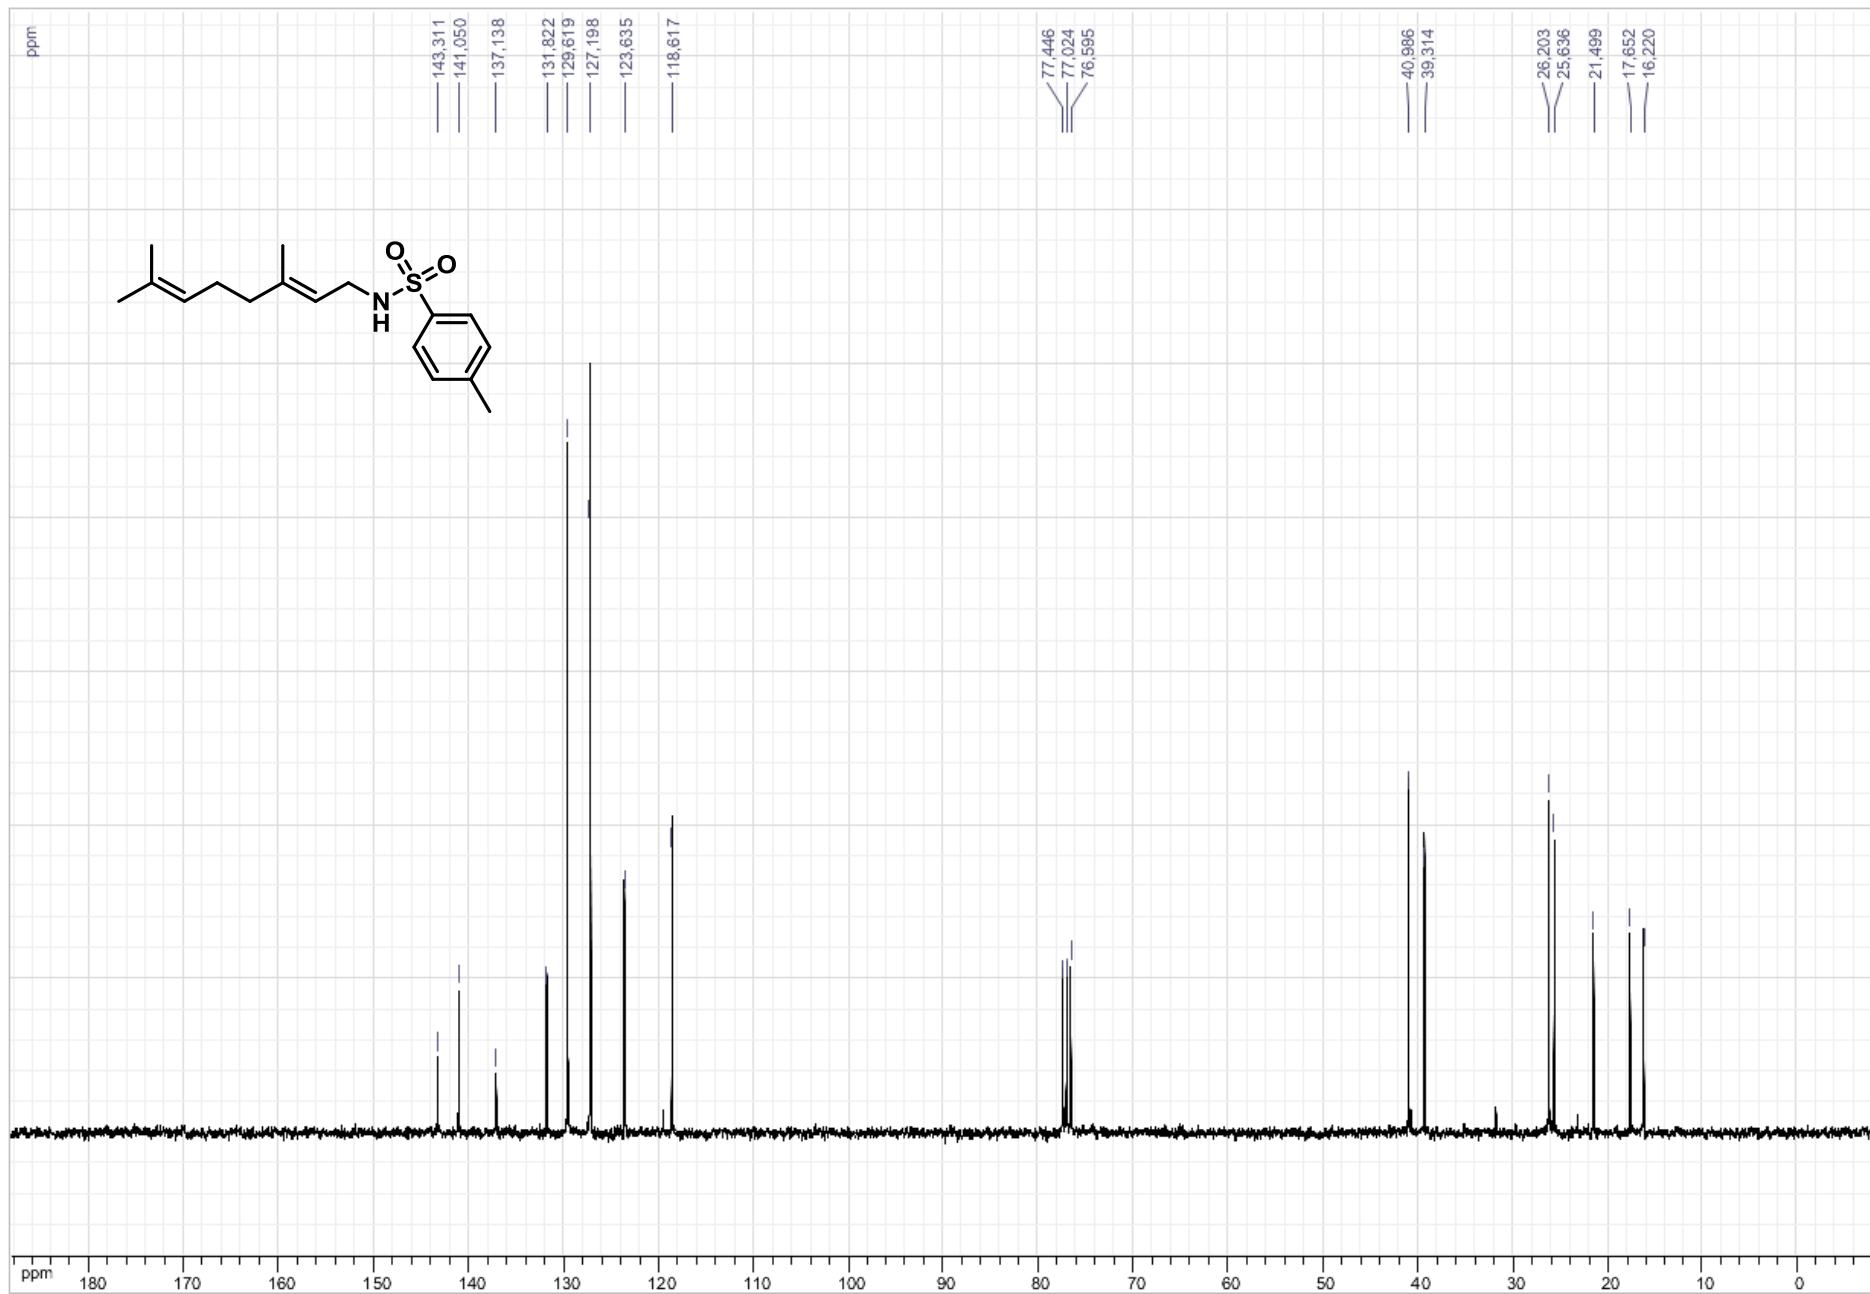

9. Copies of  $^1\text{H}$  and  $^{13}\text{C}$  NMR spectra for halogenated products

**(E)-6,7-Dibromo-3,7-dimethyloct-2-en-1-yl acetate (2a)**

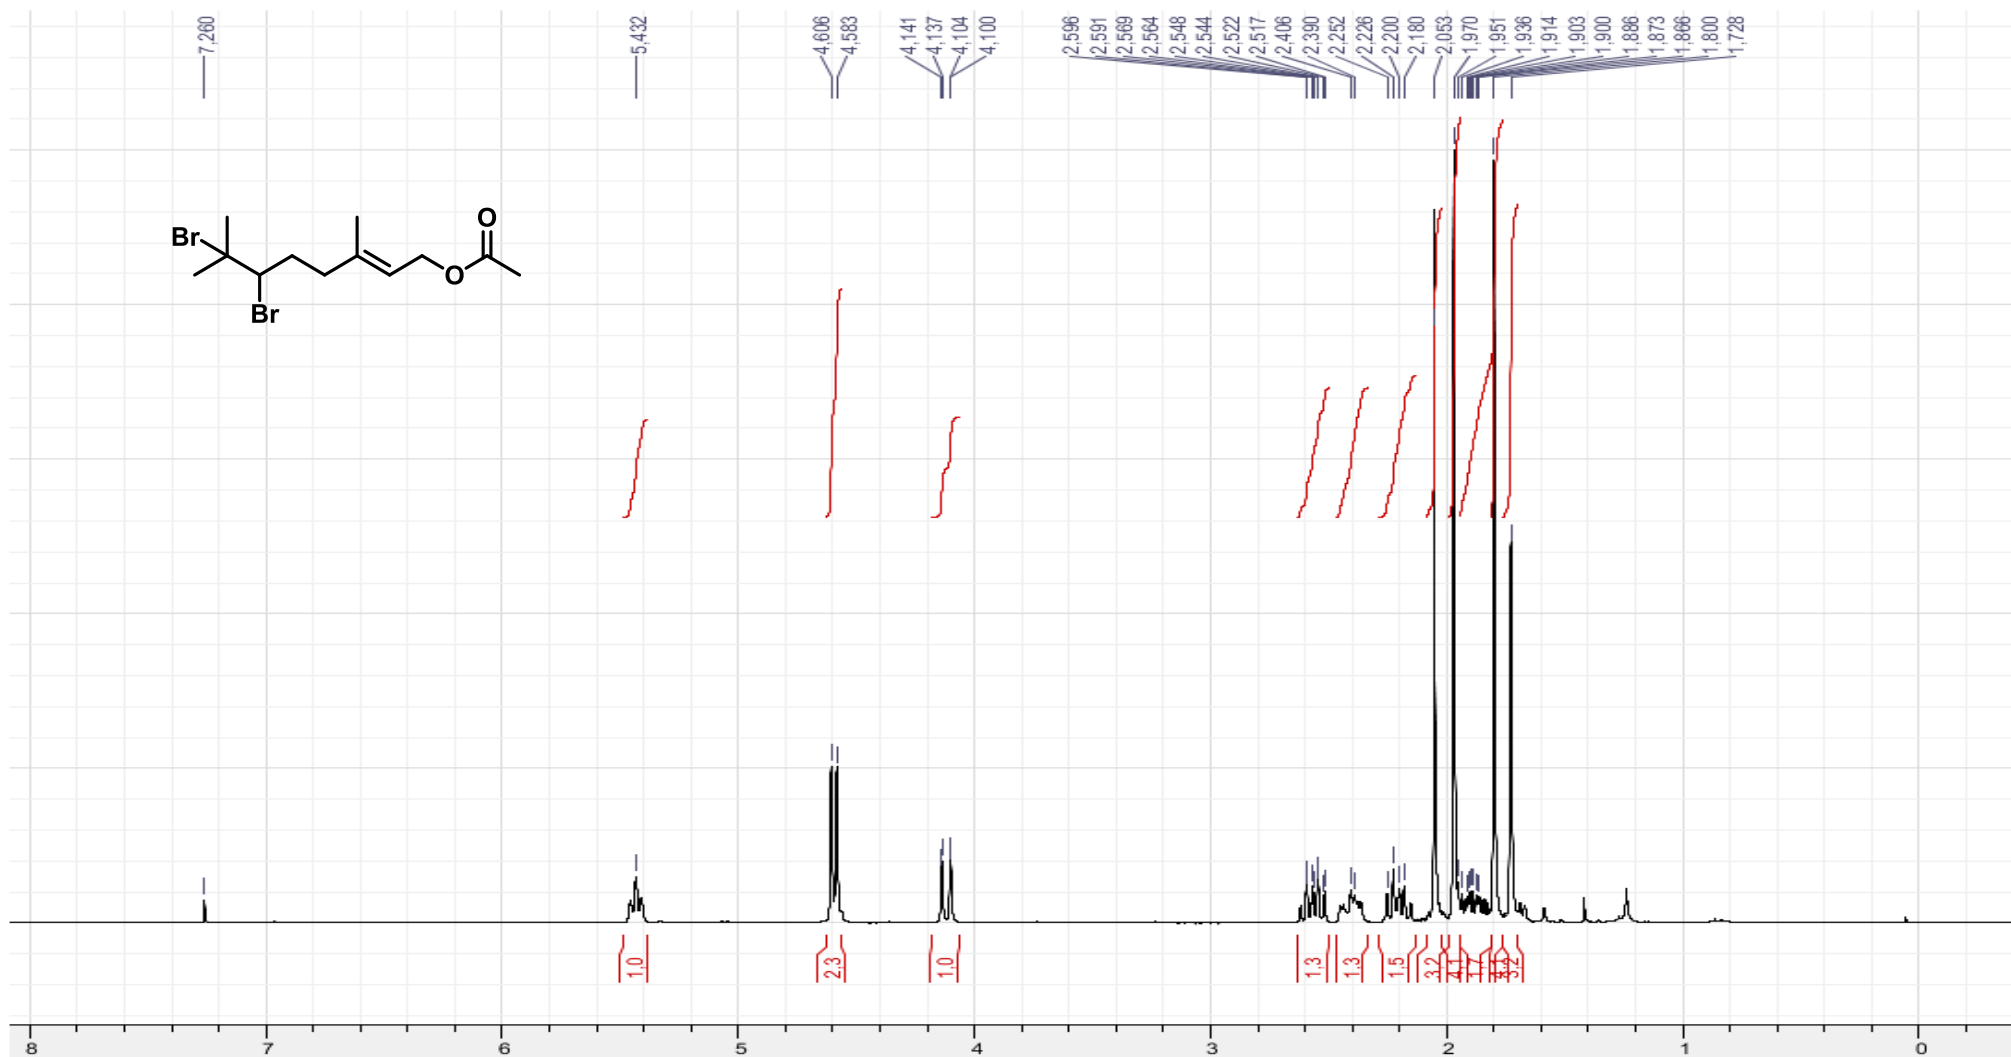

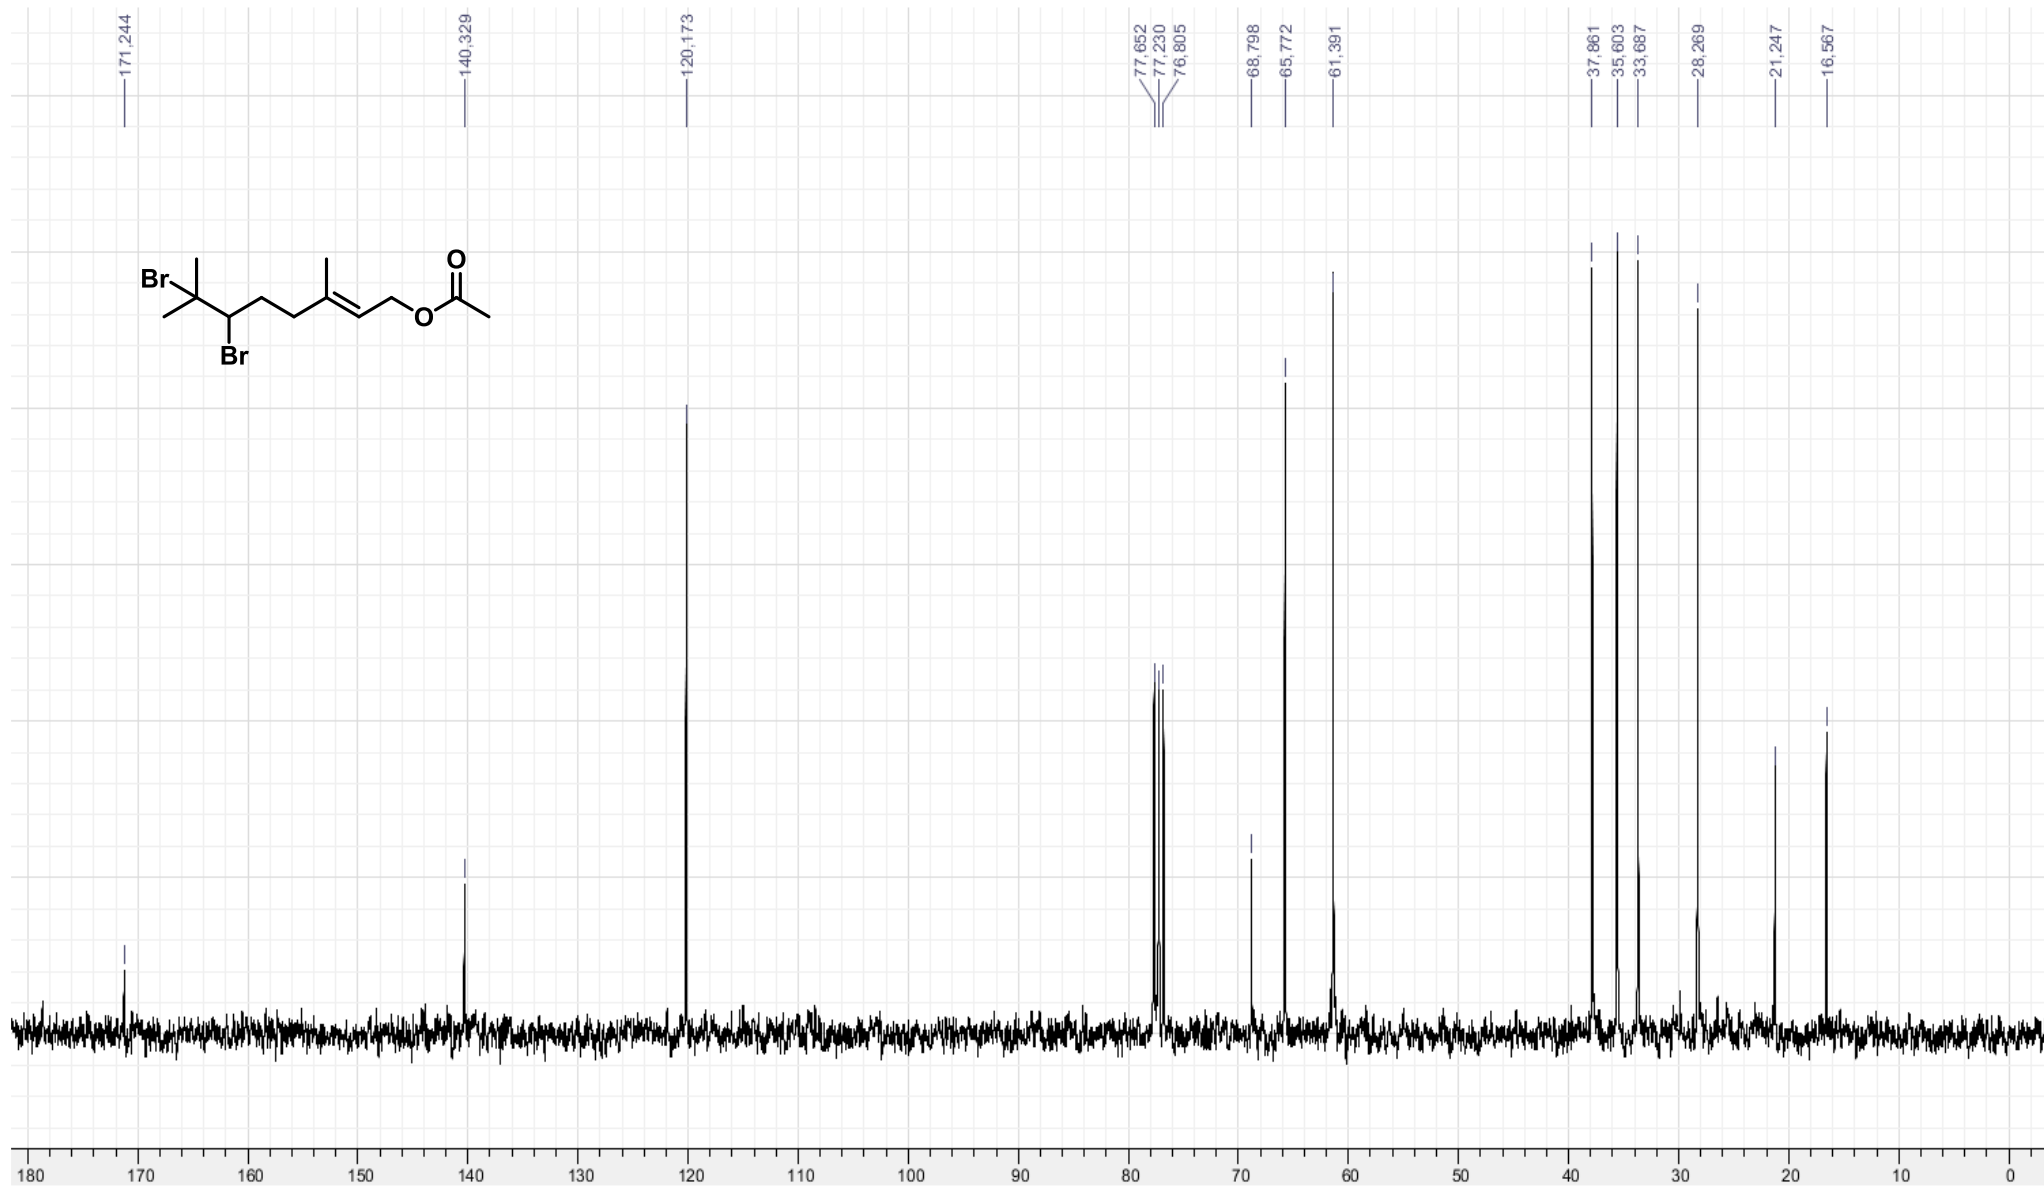

**(Z)-6,7-Dibromo-3,7-dimethyloct-2-en-1-yl acetate (2b)**

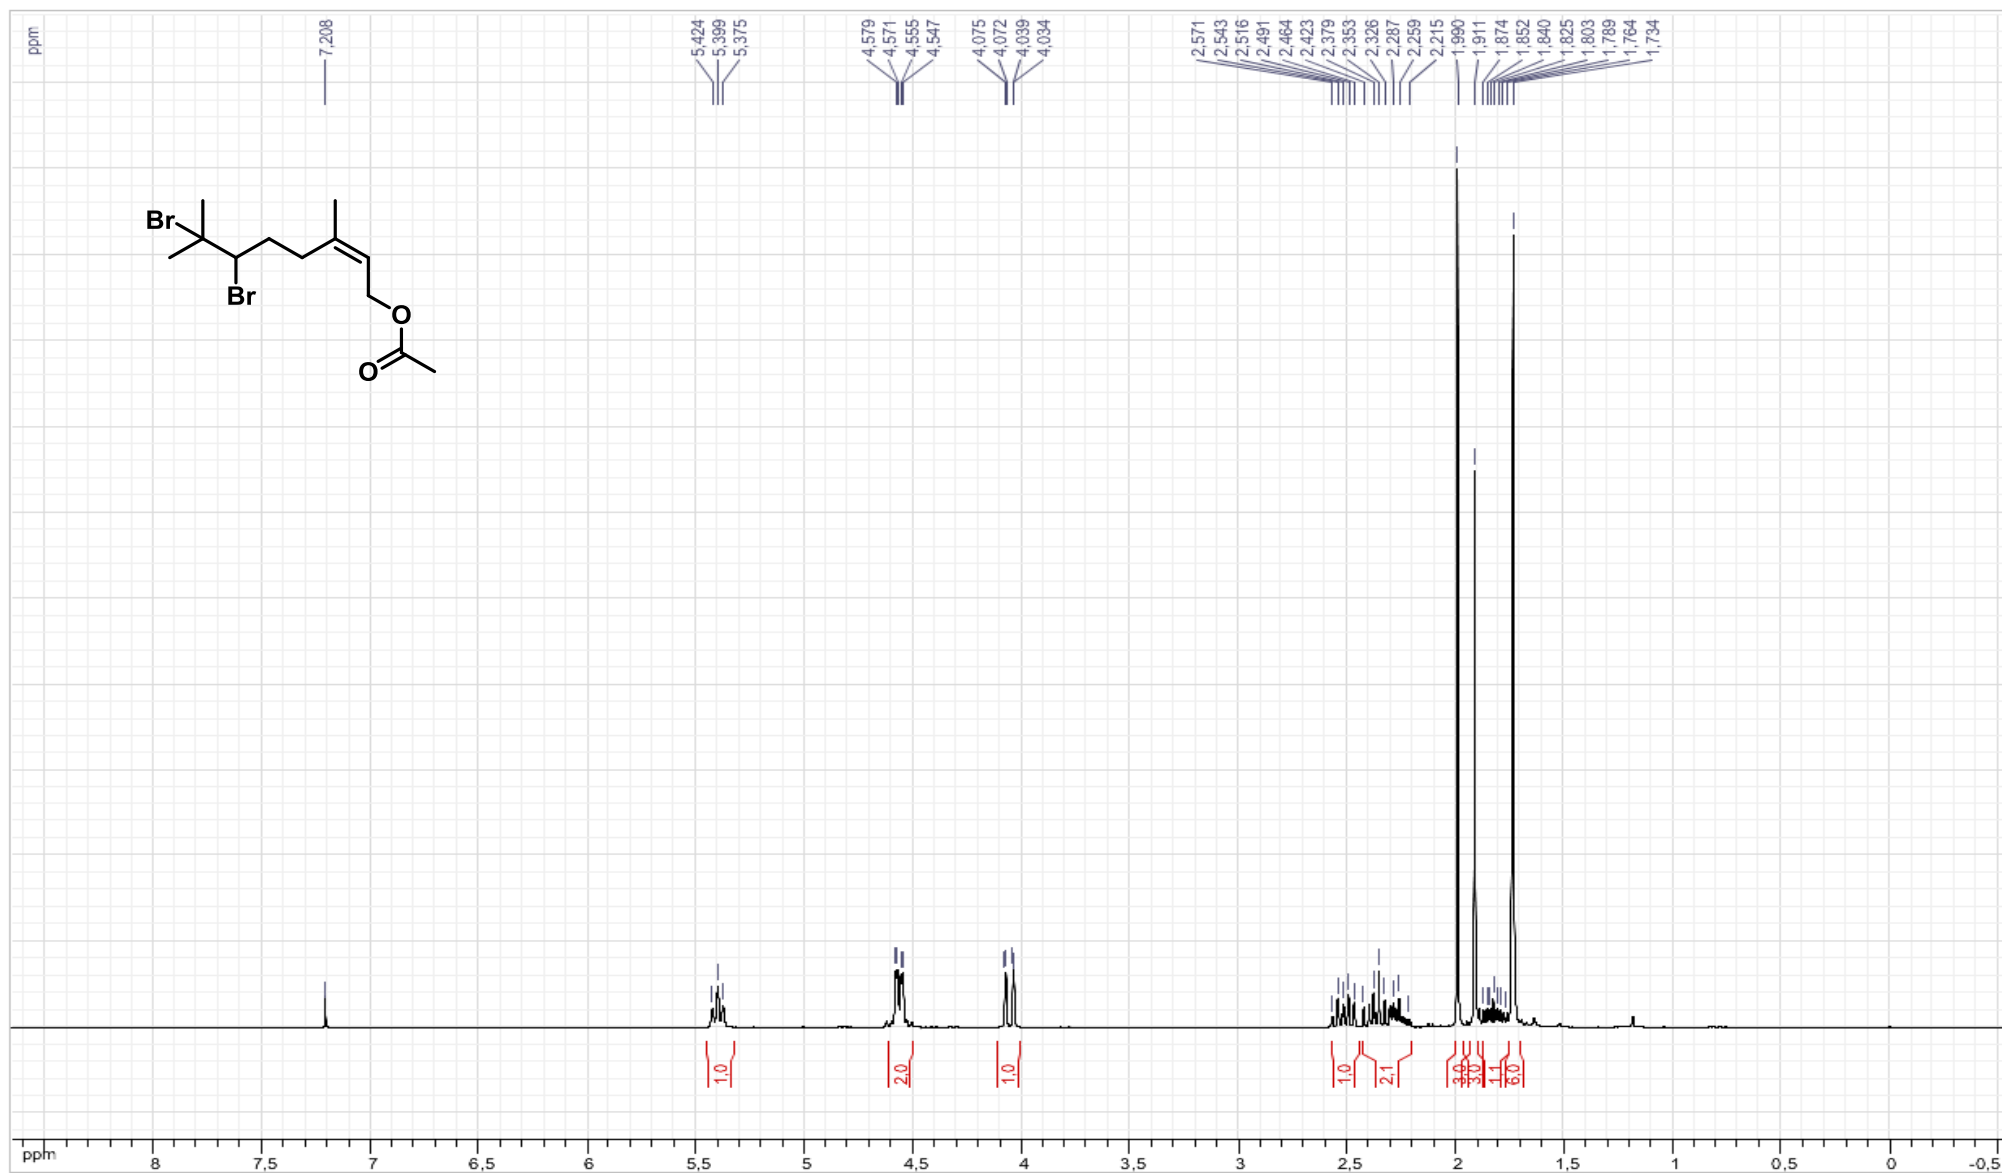

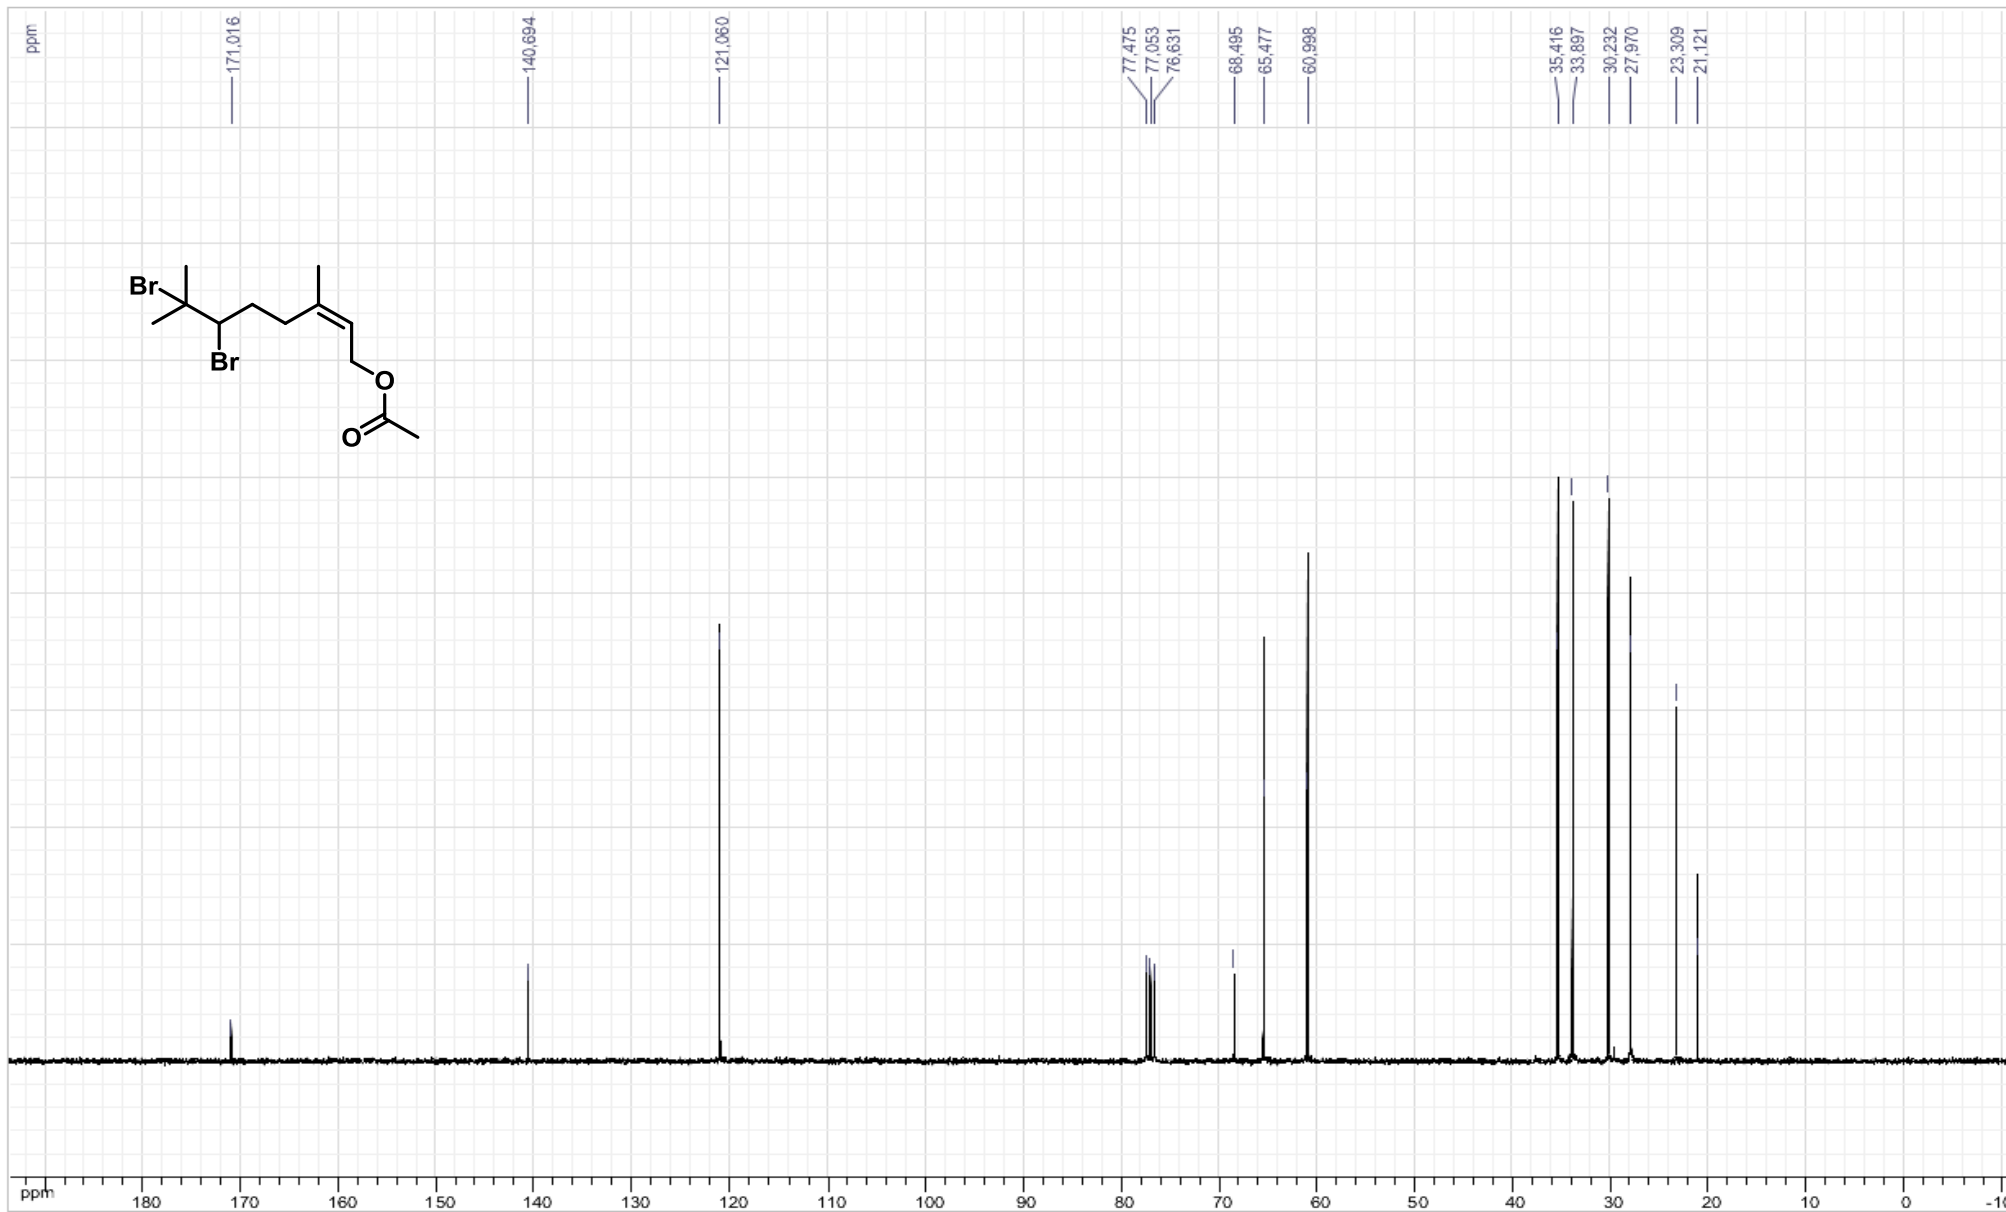

**(E)-6,7-Dibromo-3,7-dimethyloct-2-en-1-ol (2c)**

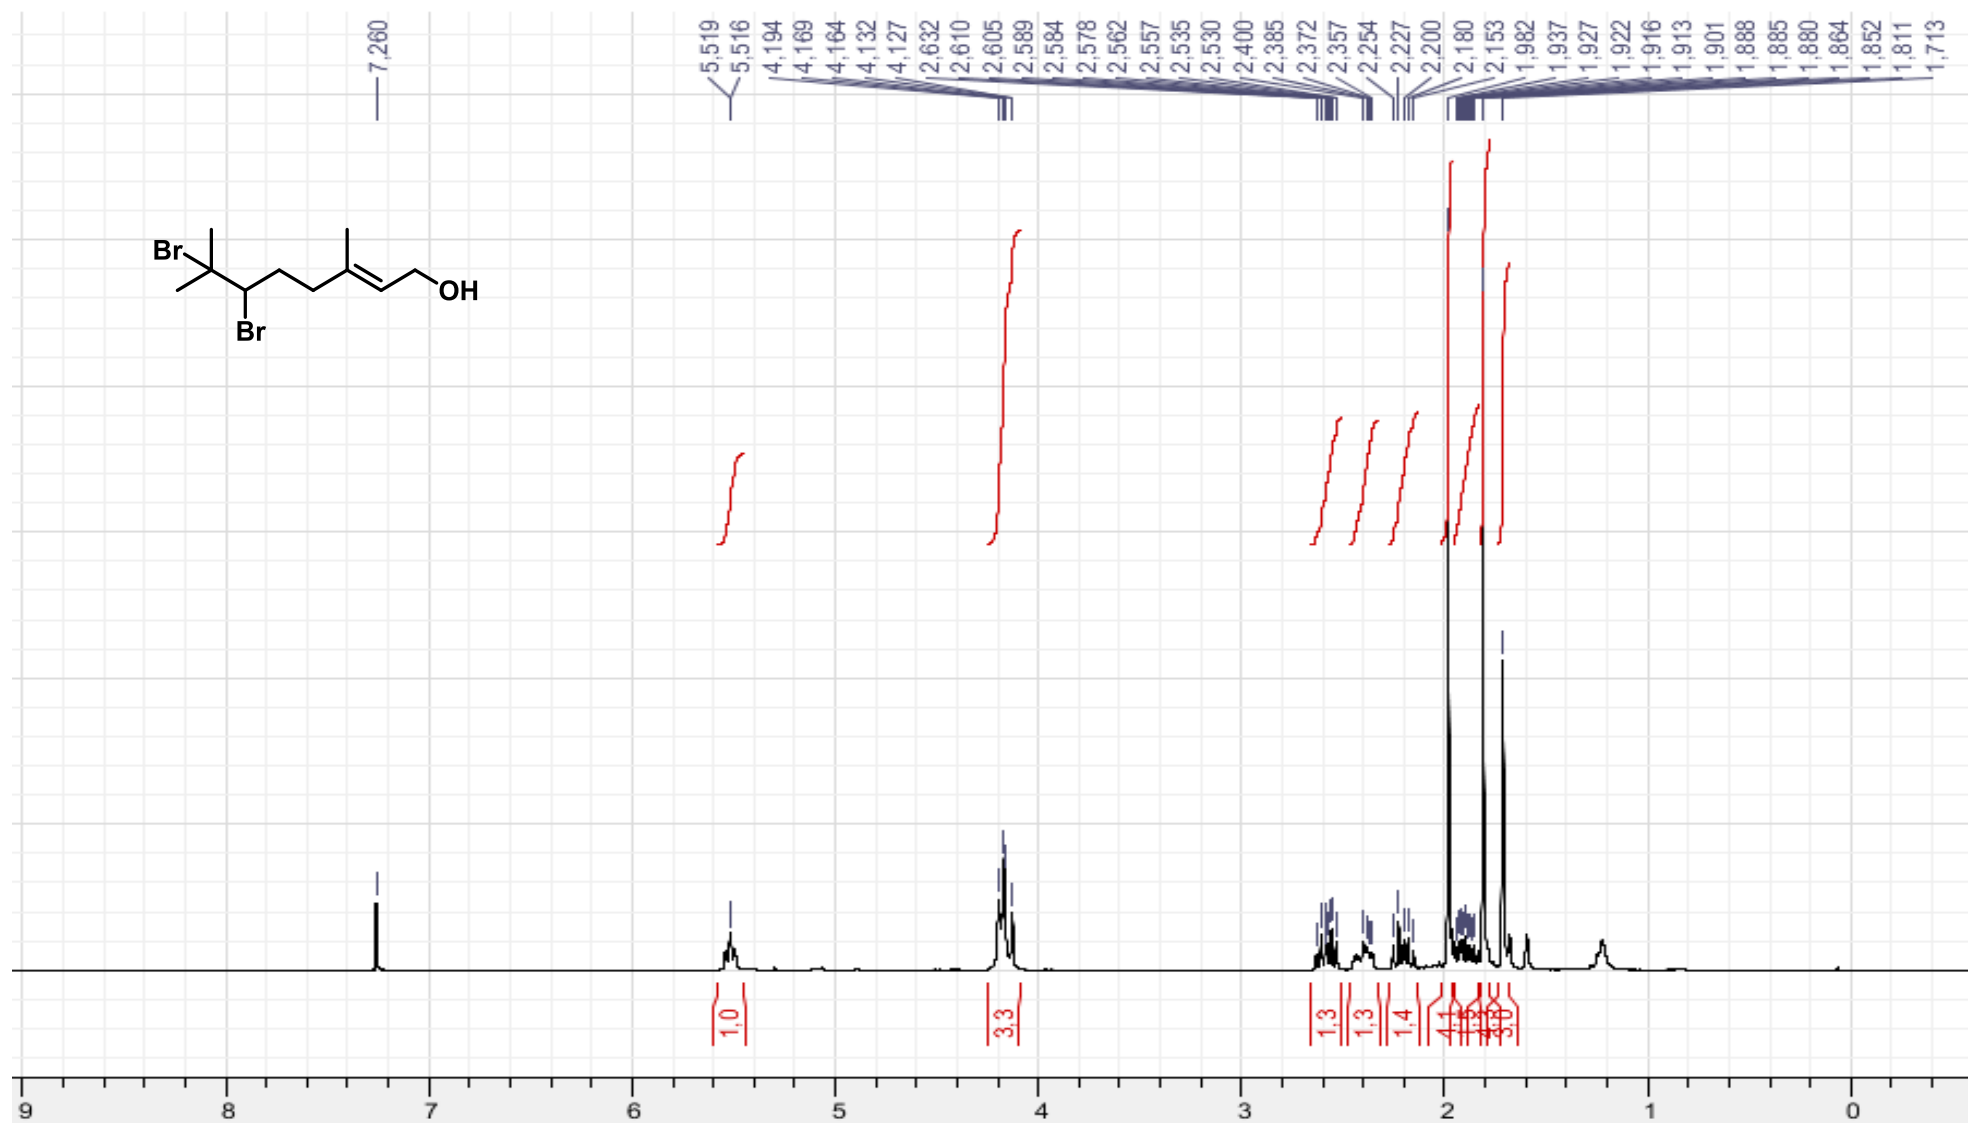



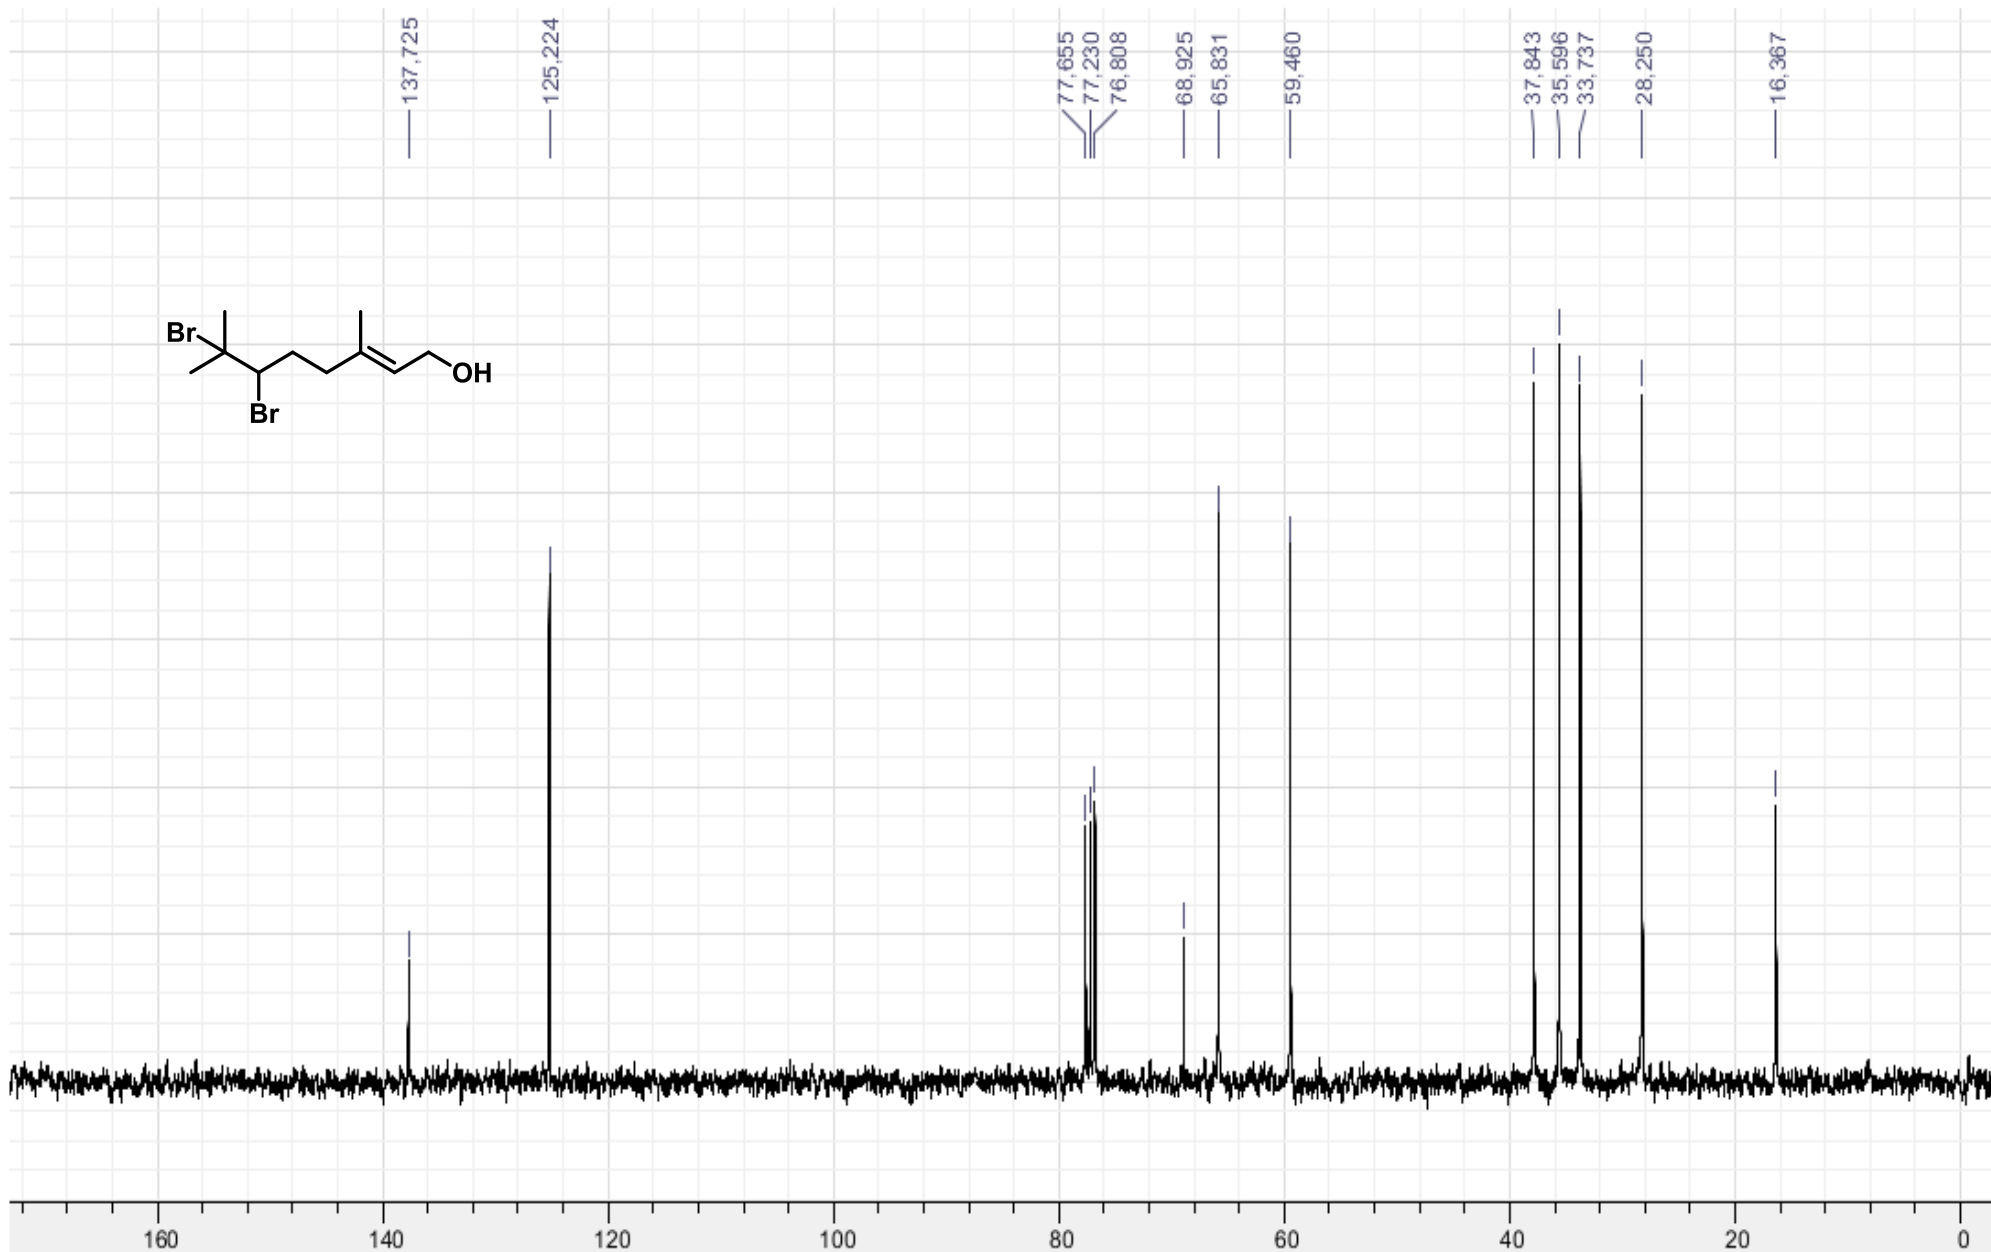

**(E)-N-(6,7-Dibromo-3,7-dimethyloct-2-en-1-yl)-4-methylbenzenesulfonamide (2d)**

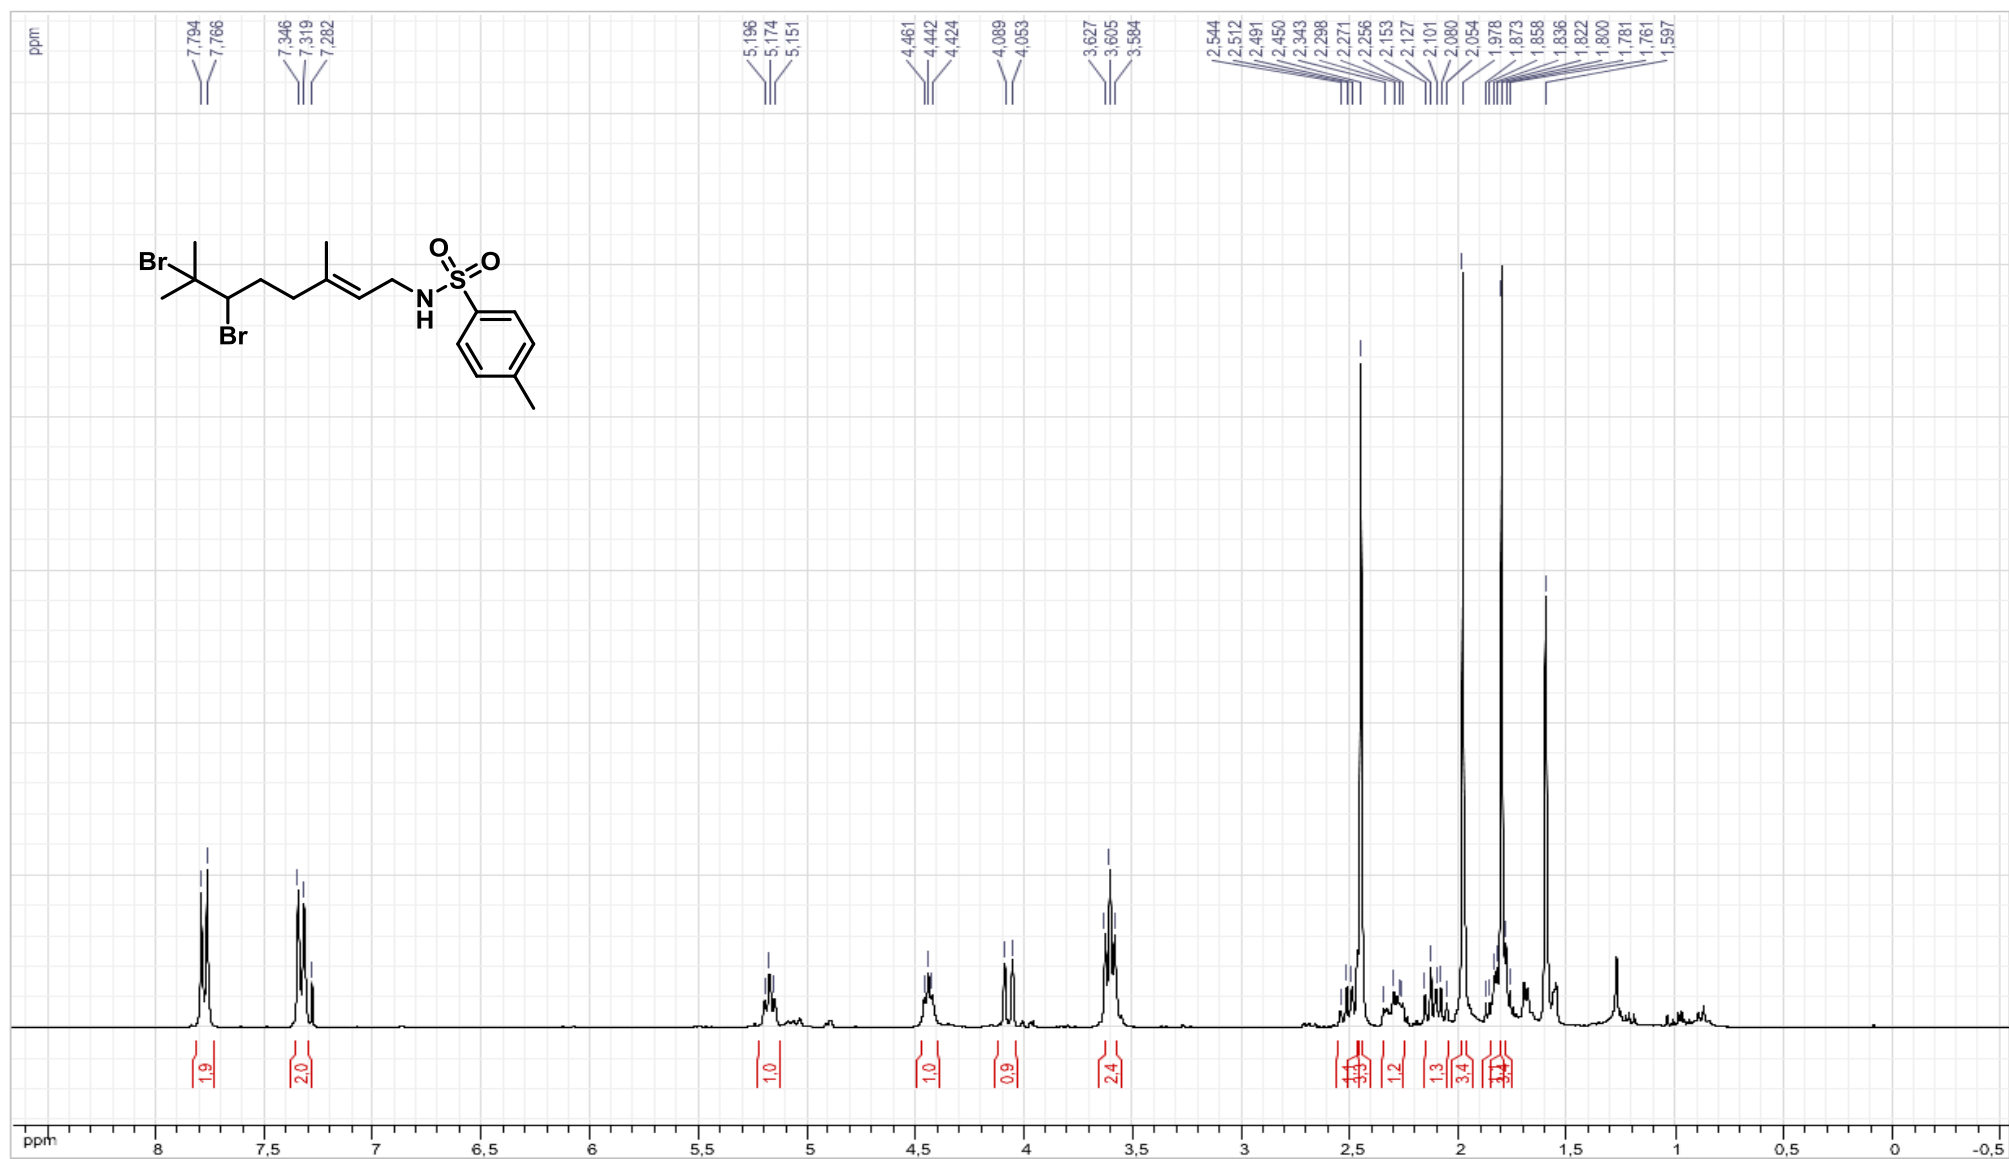

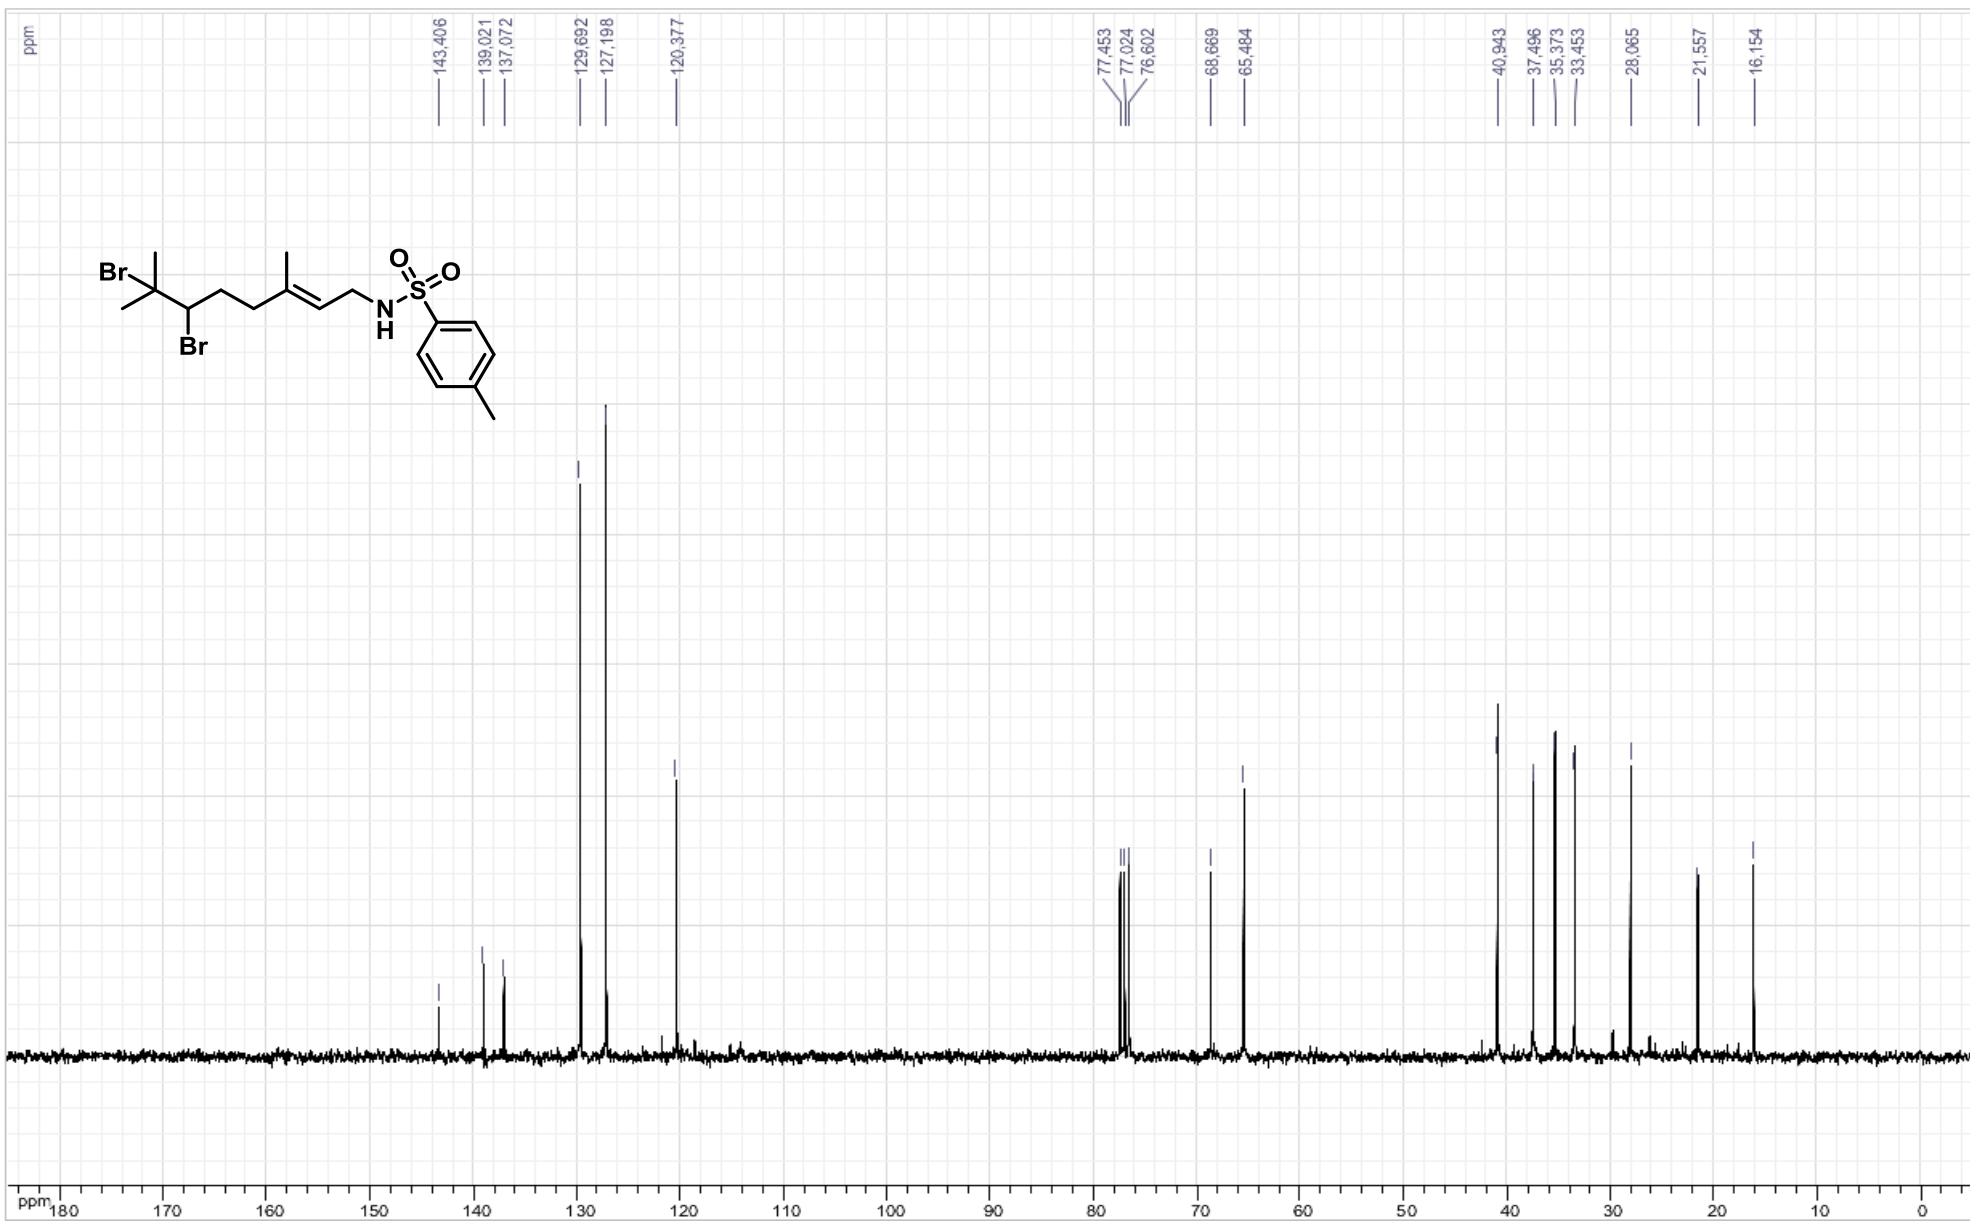

6,7-Dibromo-7-methyl-3-methyloct-1-ene (2e)

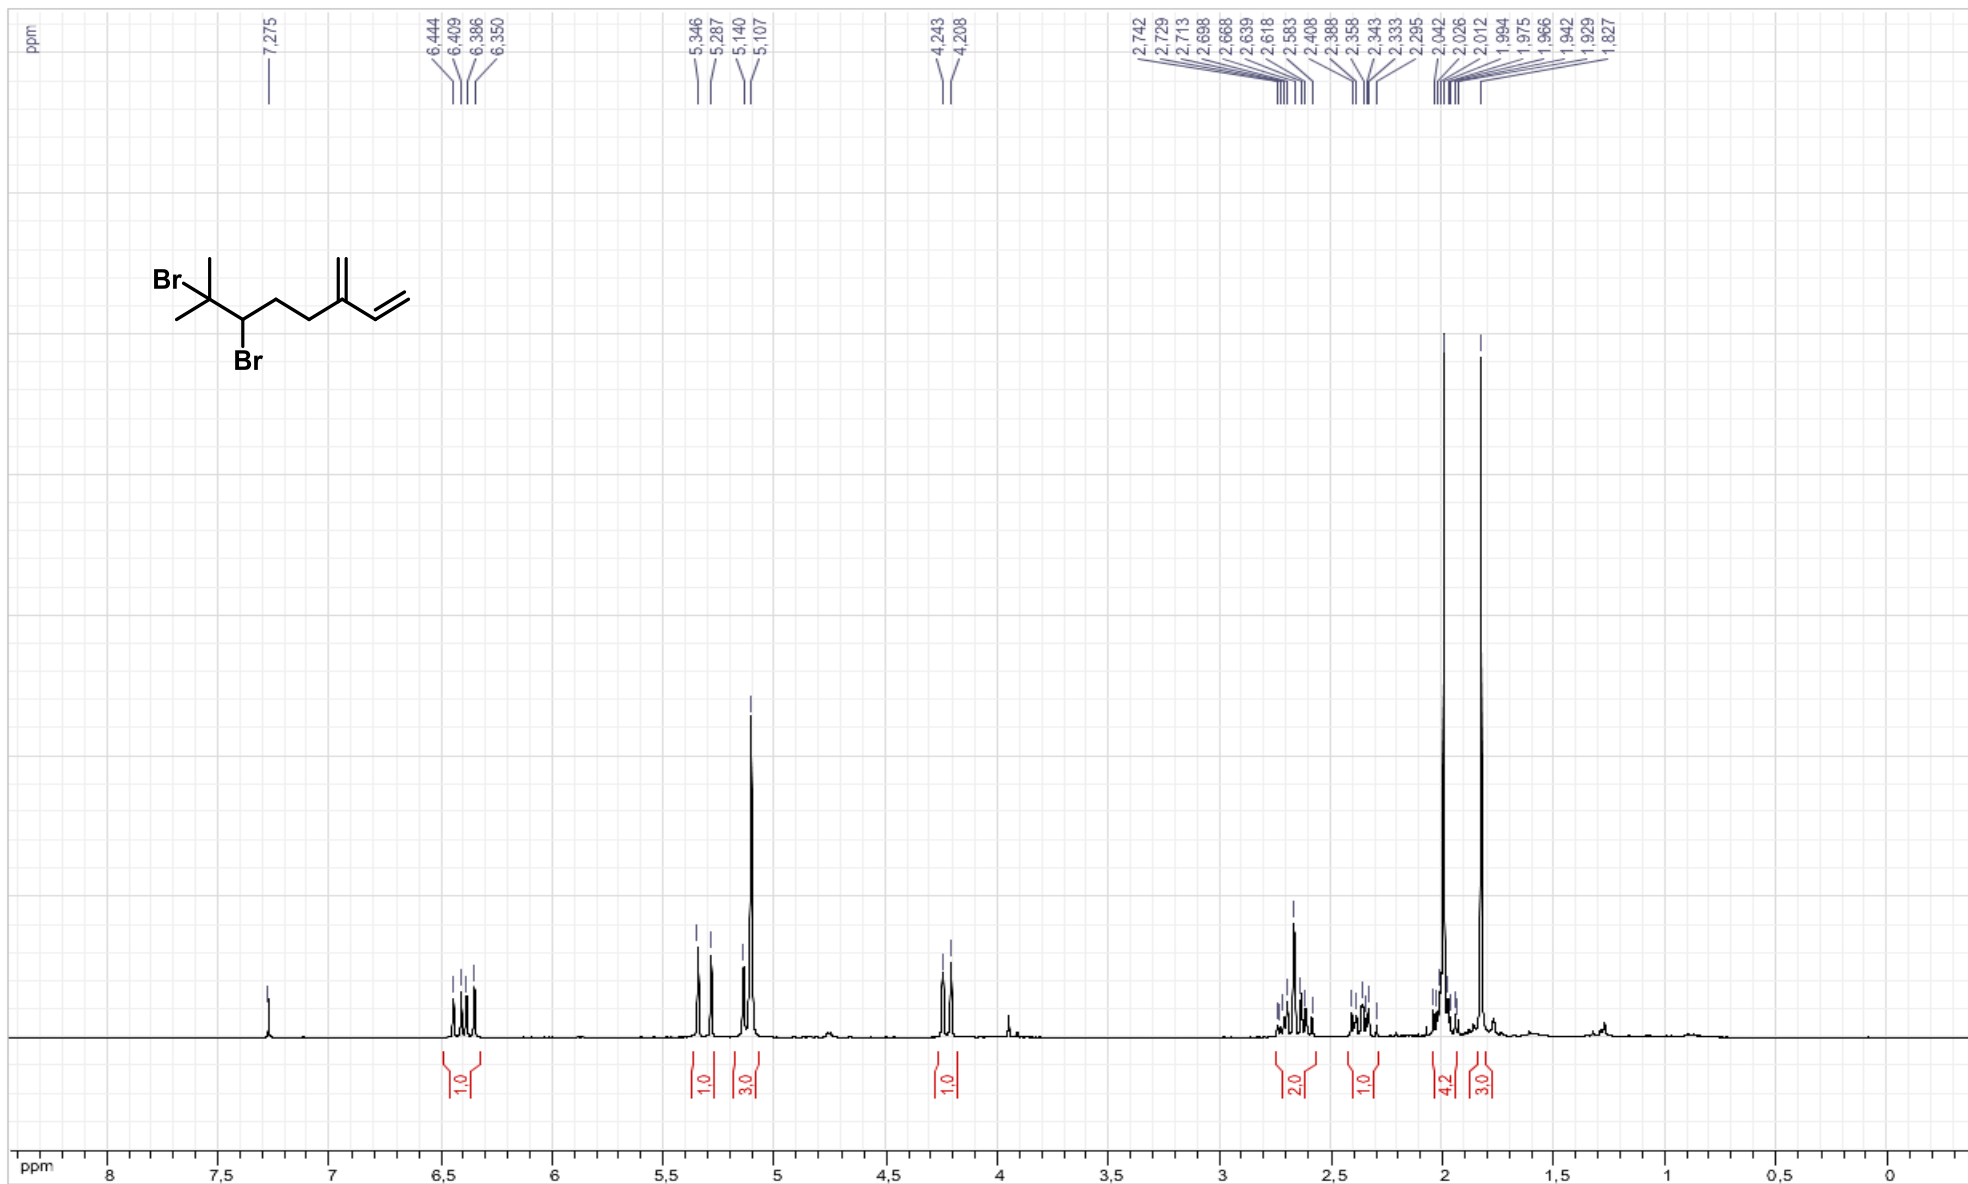

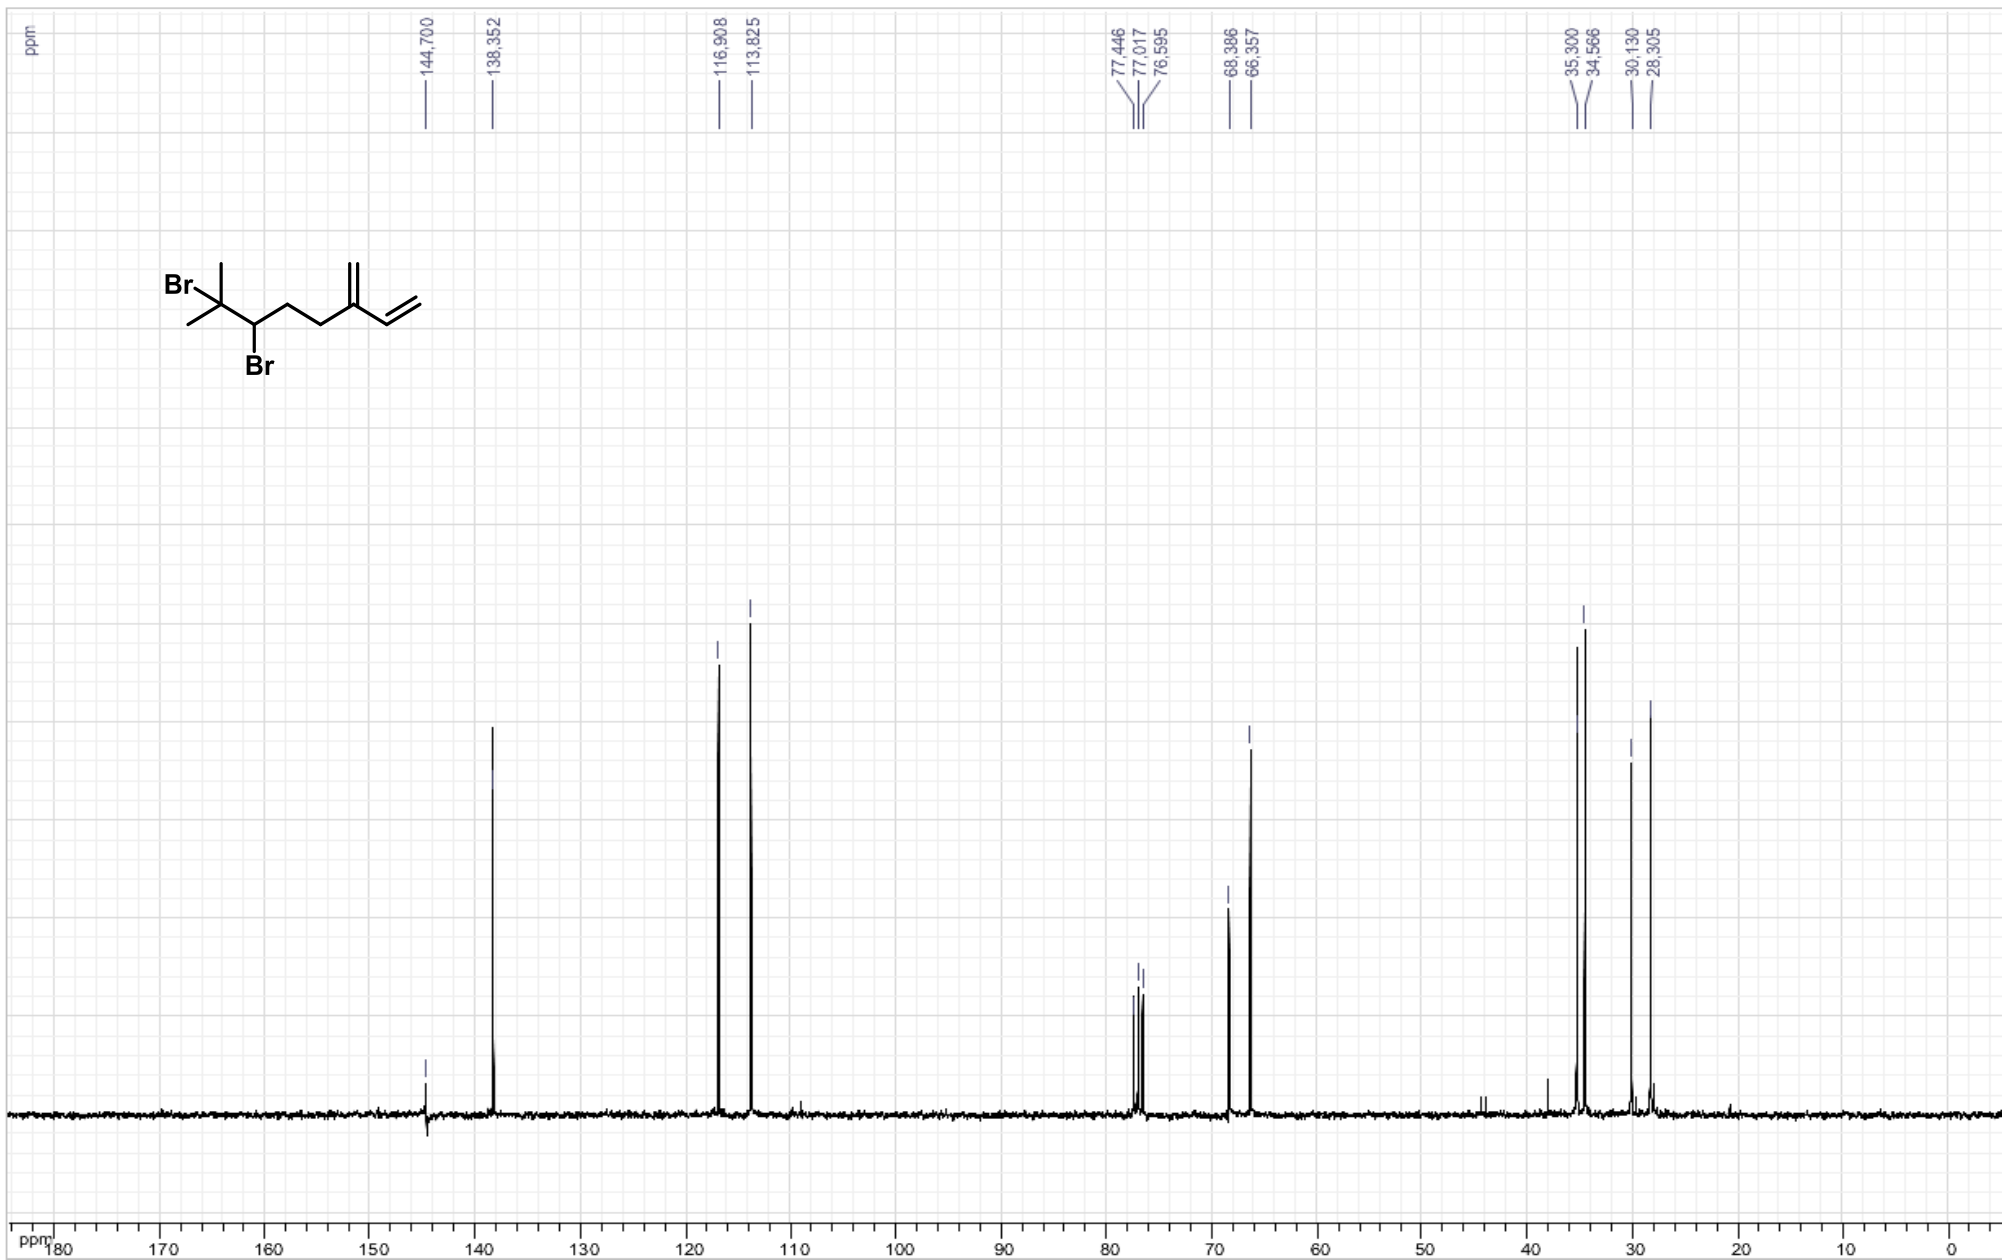

**(E)-8-Acetoxy-3-bromo-2,6-dimethyloct-6-en-2-yl 2,2,2-trifluoroacetate (3a)**

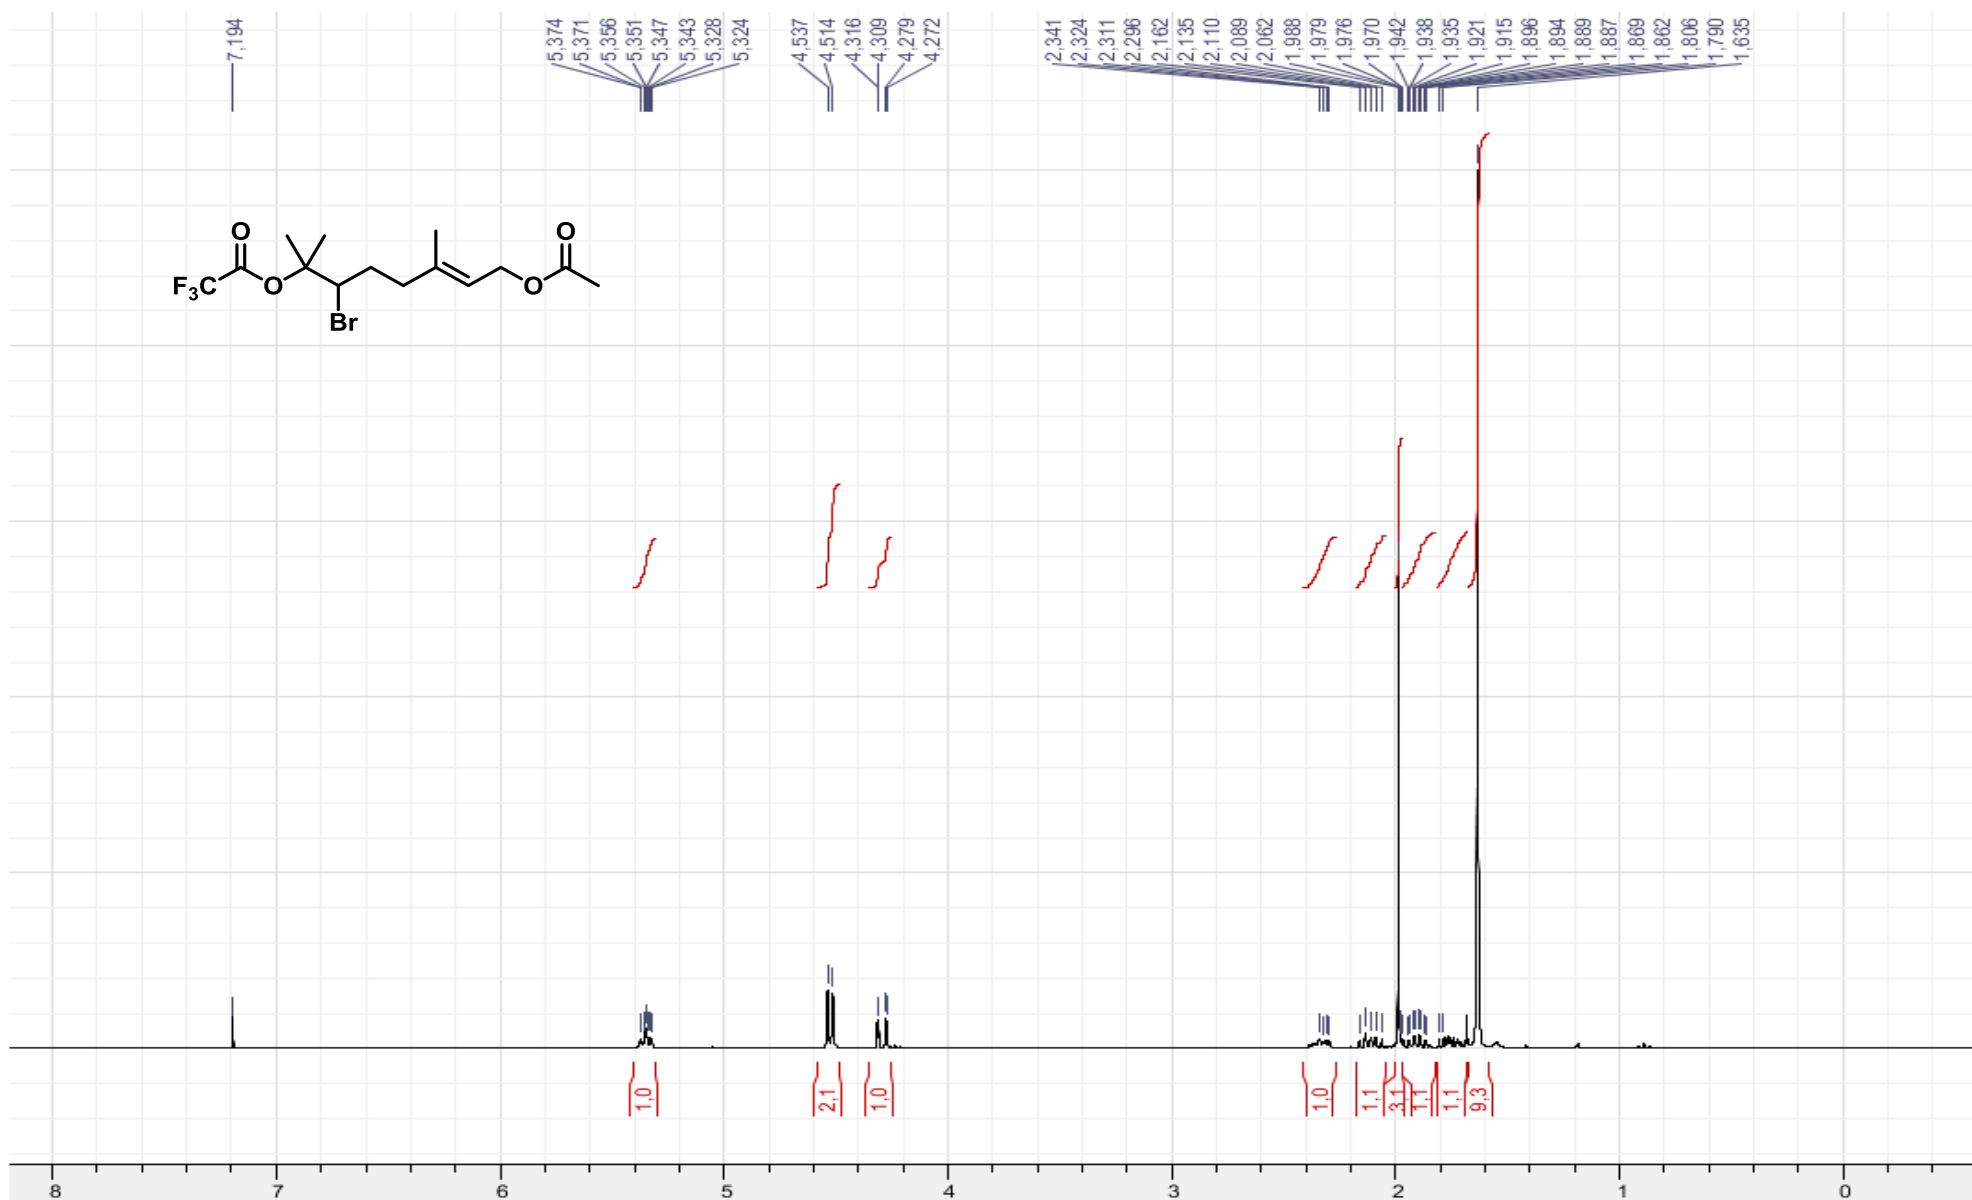

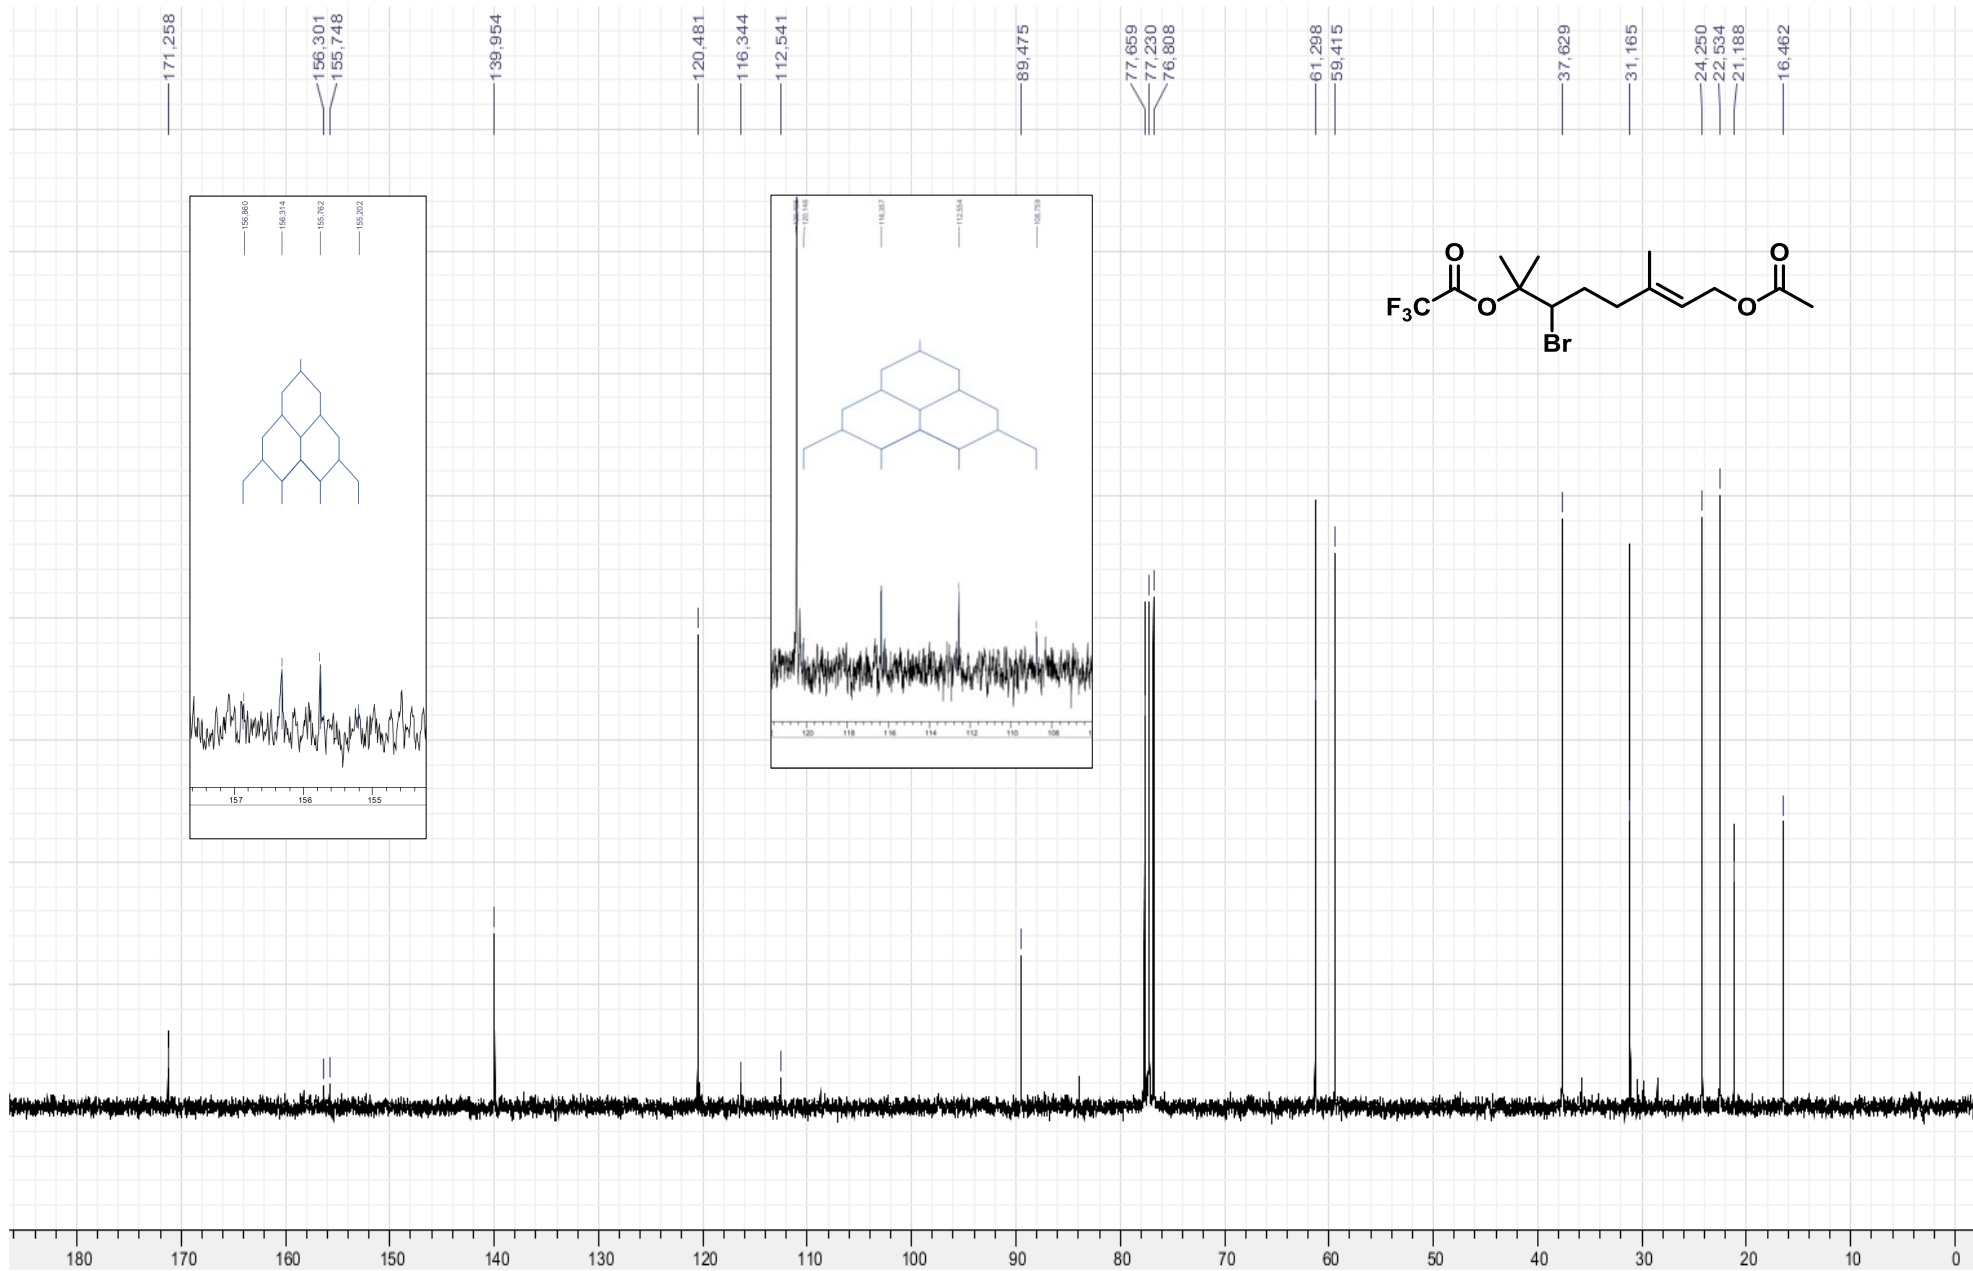

**(Z)-8-Acetoxy-3-bromo-2,6-dimethyloct-6-en-2-yl 2,2,2-trifluoroacetate (3b)**

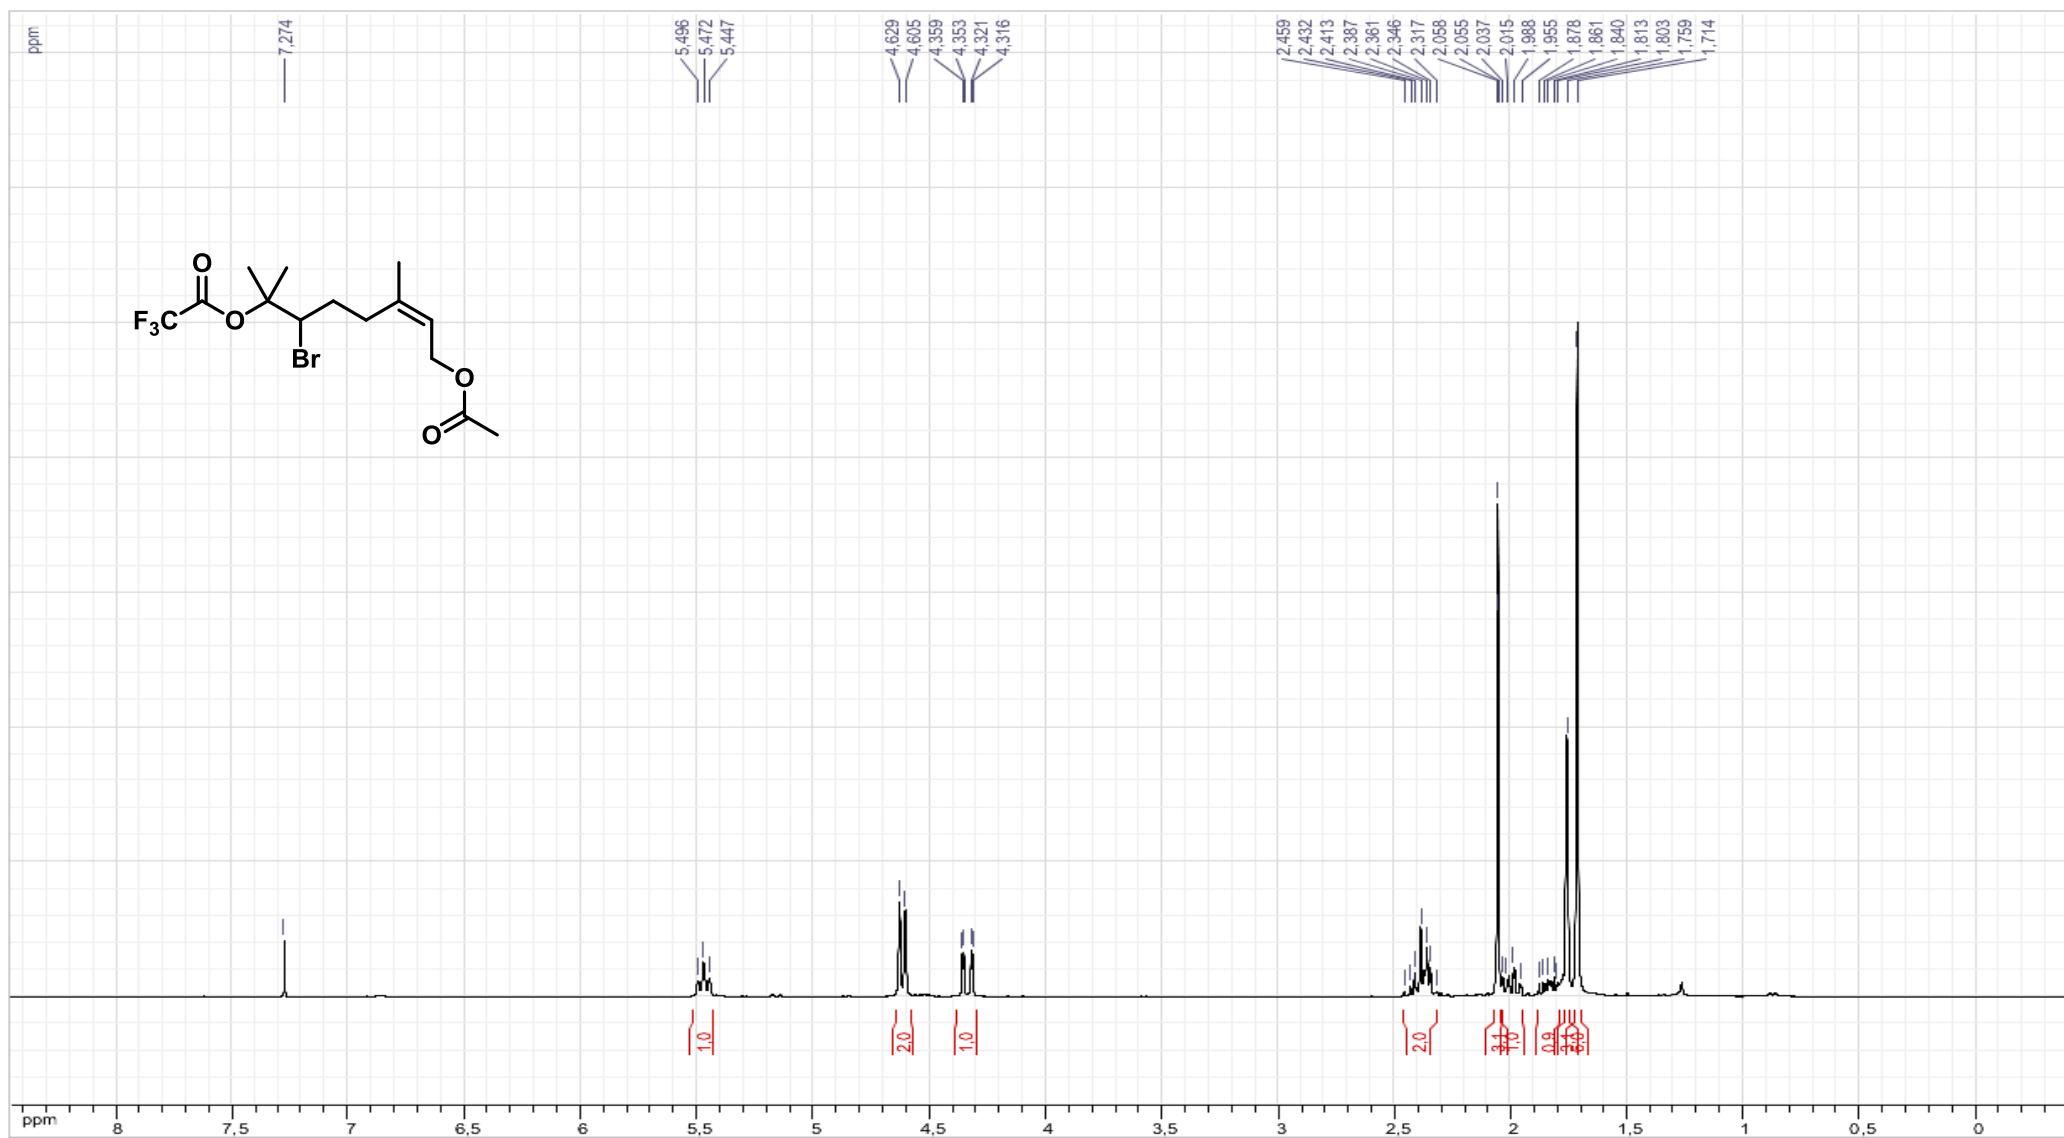



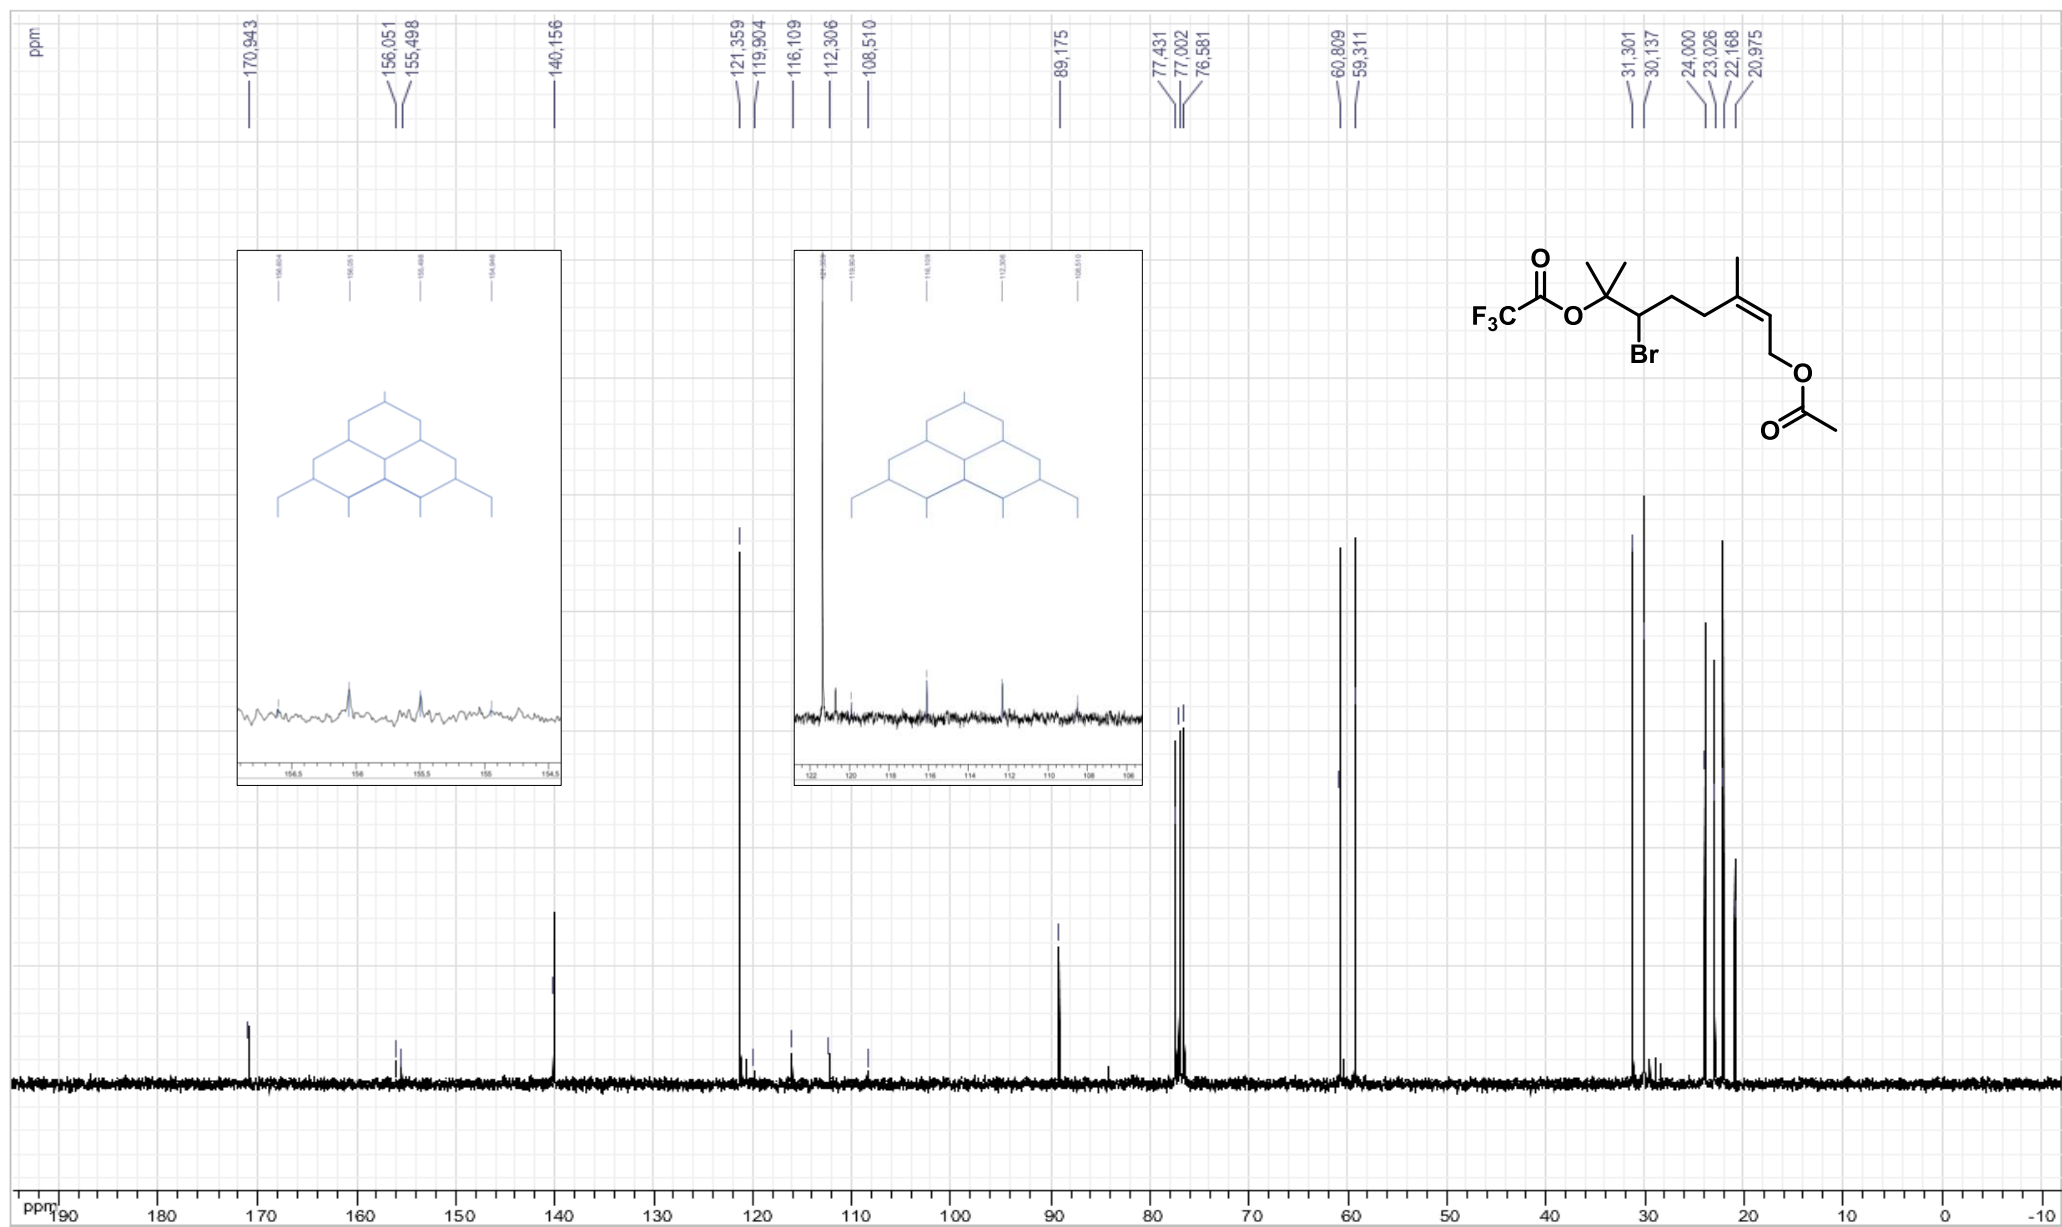

**(E)-3-Bromo-8-hydroxy-2,6-dimethyloct-6-en-2-yl 2,2,2-trifluoroacetate (3c)**

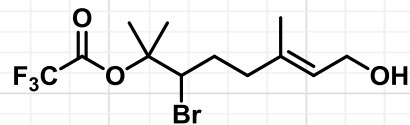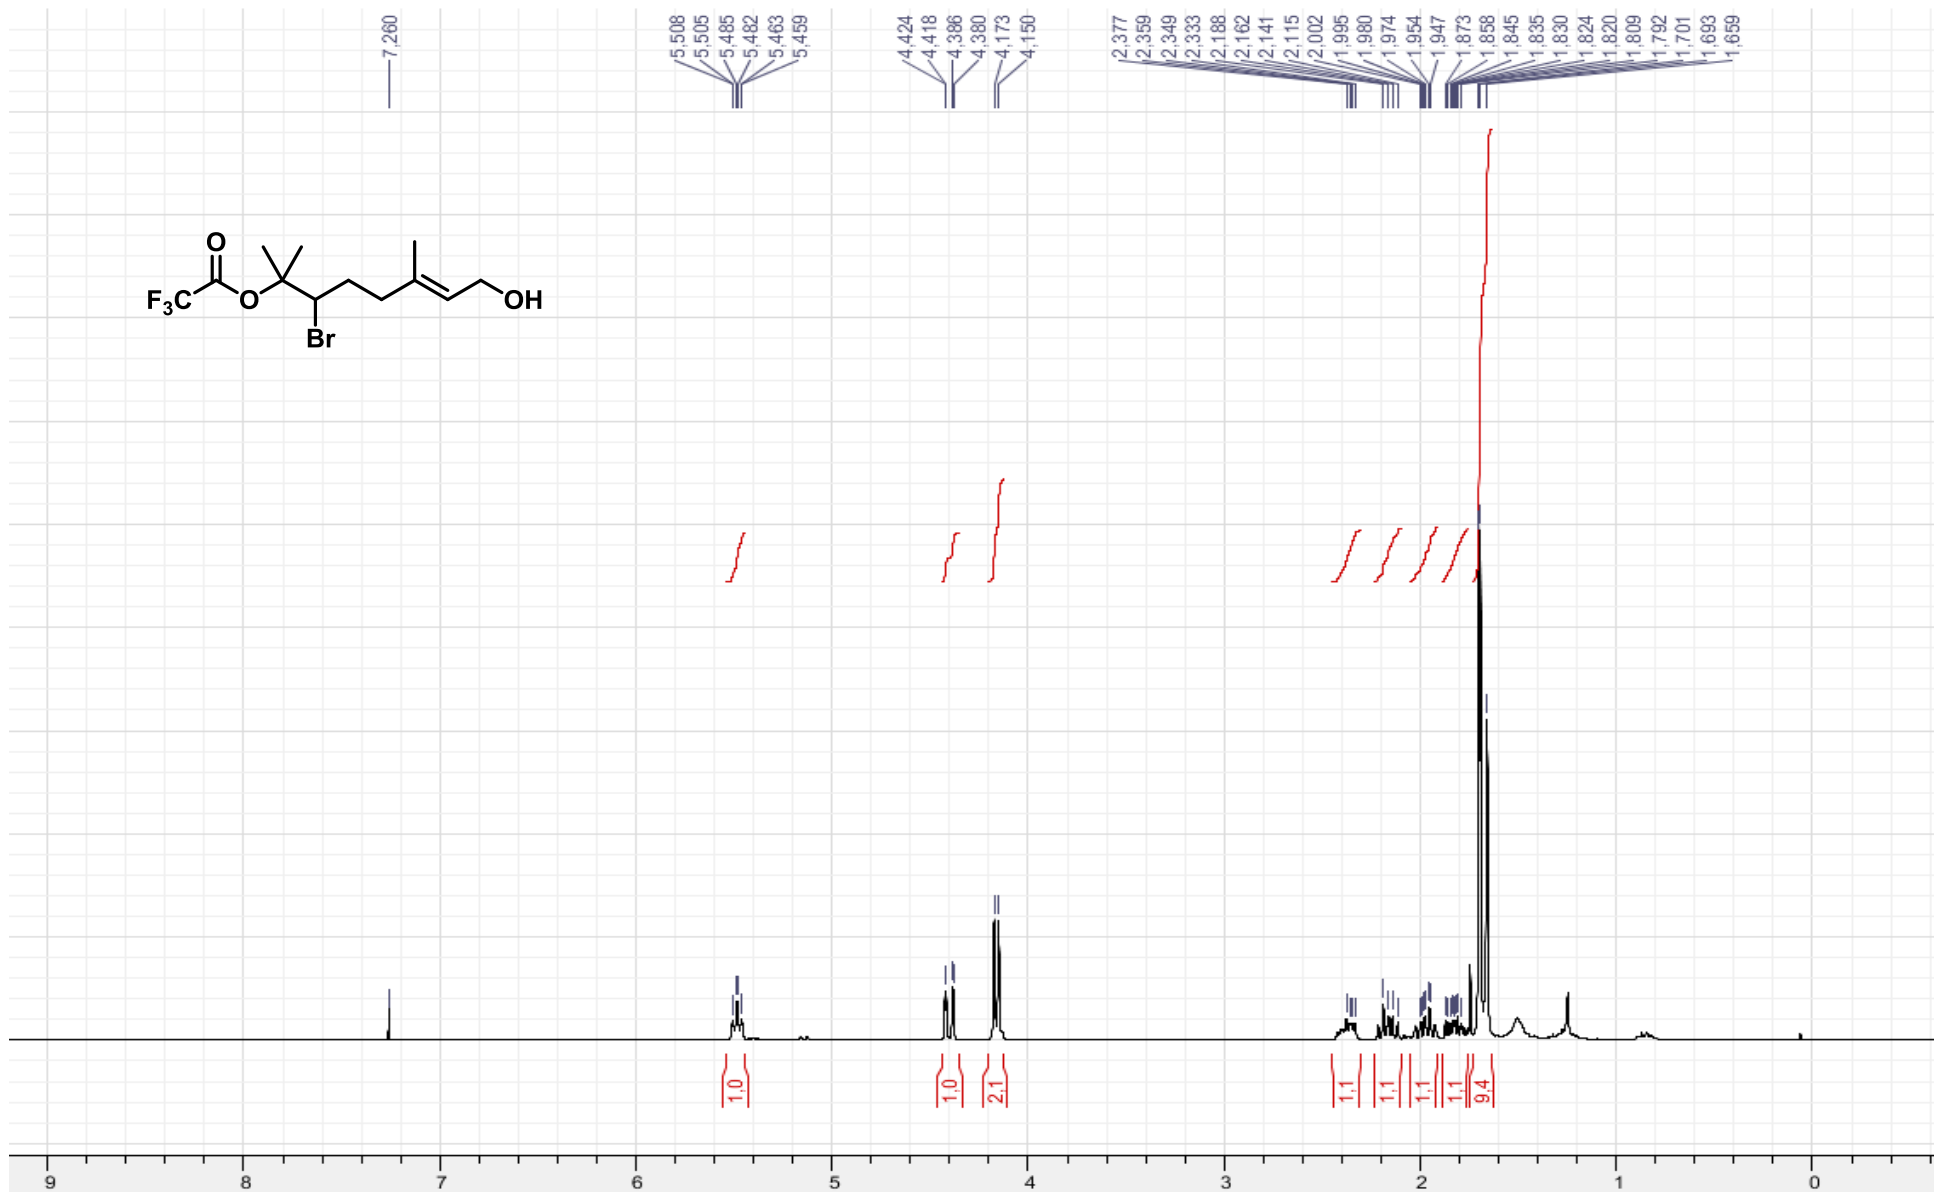

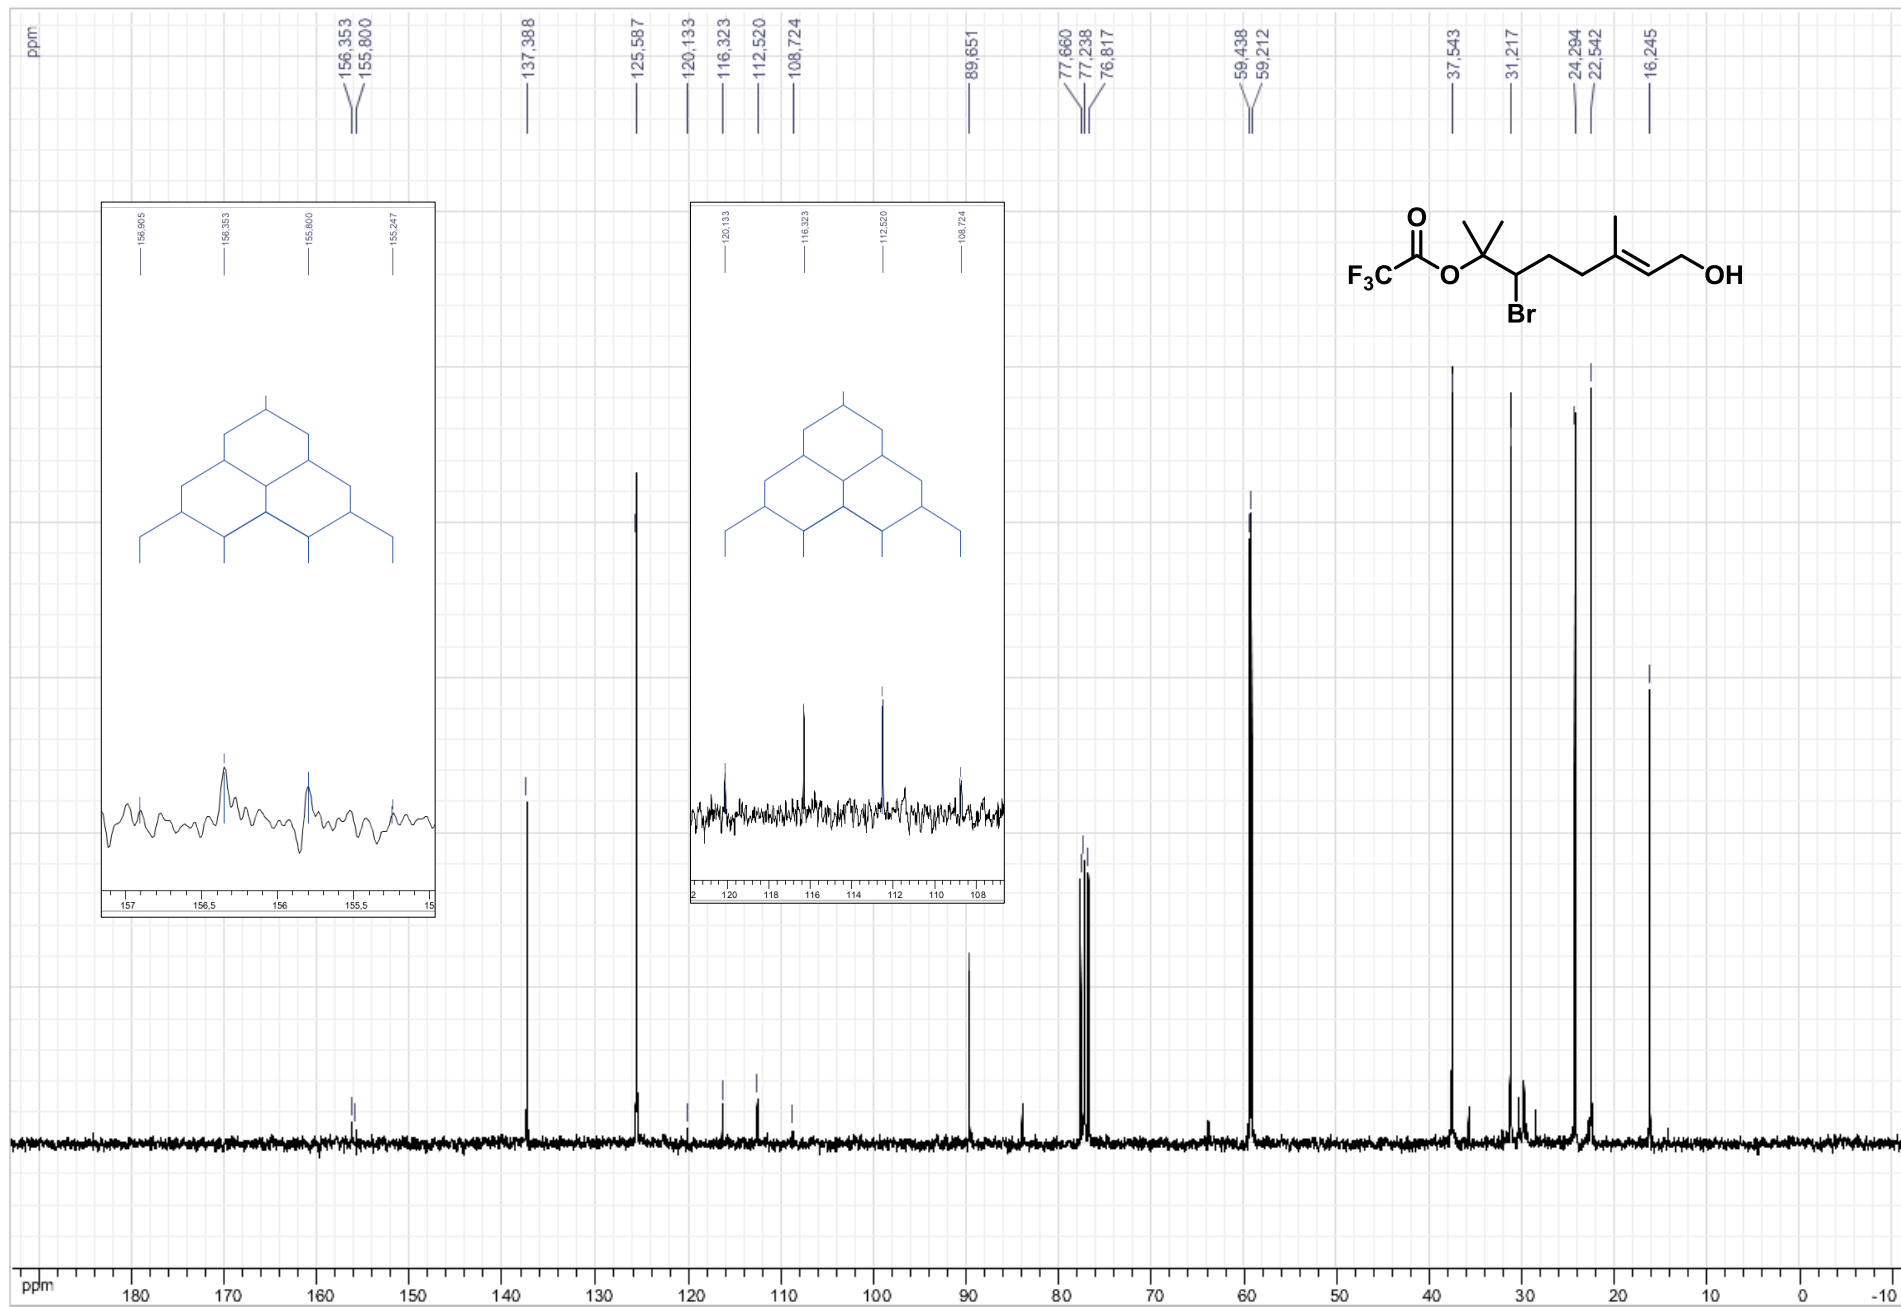

**(E)-3-Bromo-2,6-dimethyl-8-((4-methylphenyl)sulfonamido)oct-6-en-2-yl 2,2,2-trifluoroacetate (3d)**

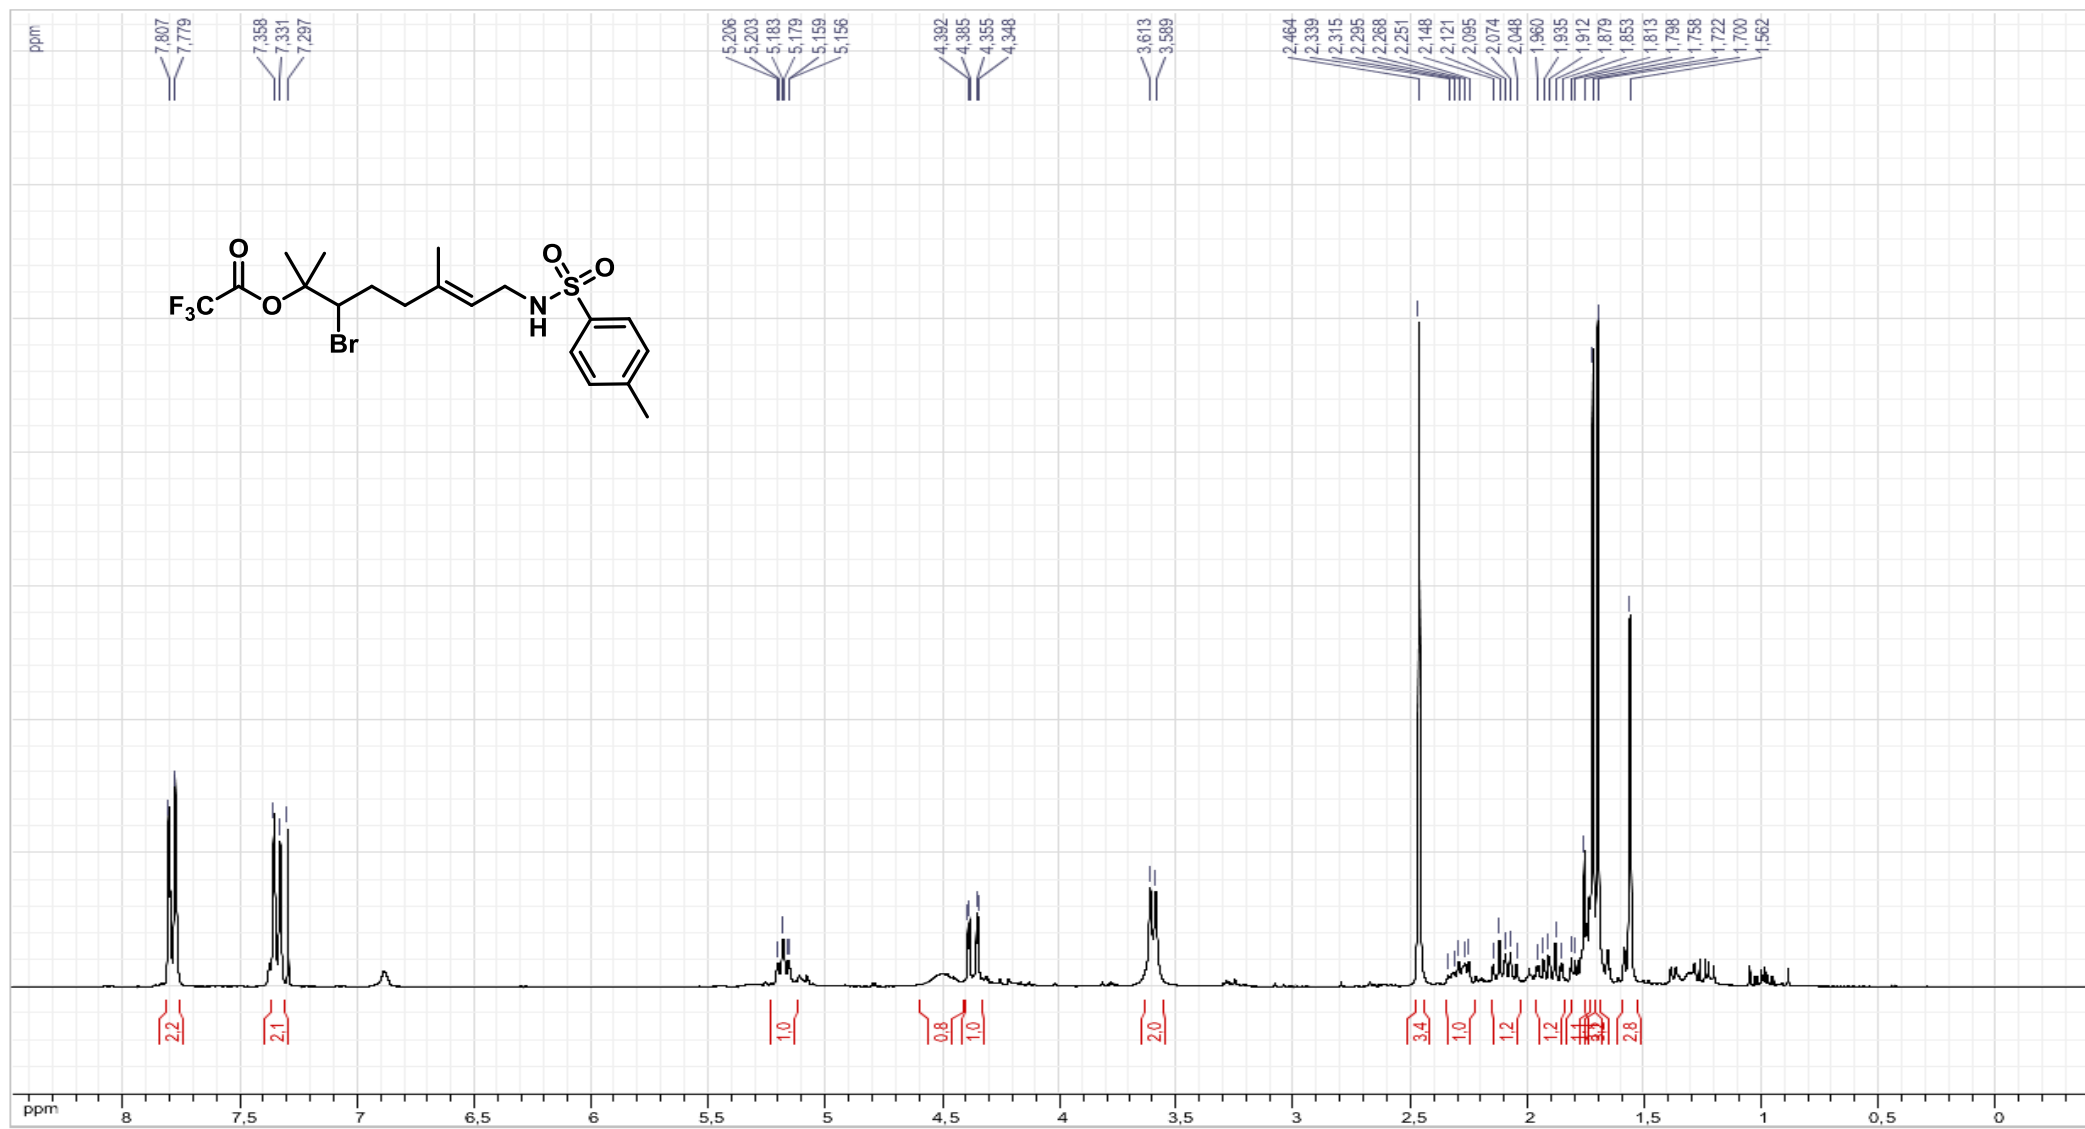

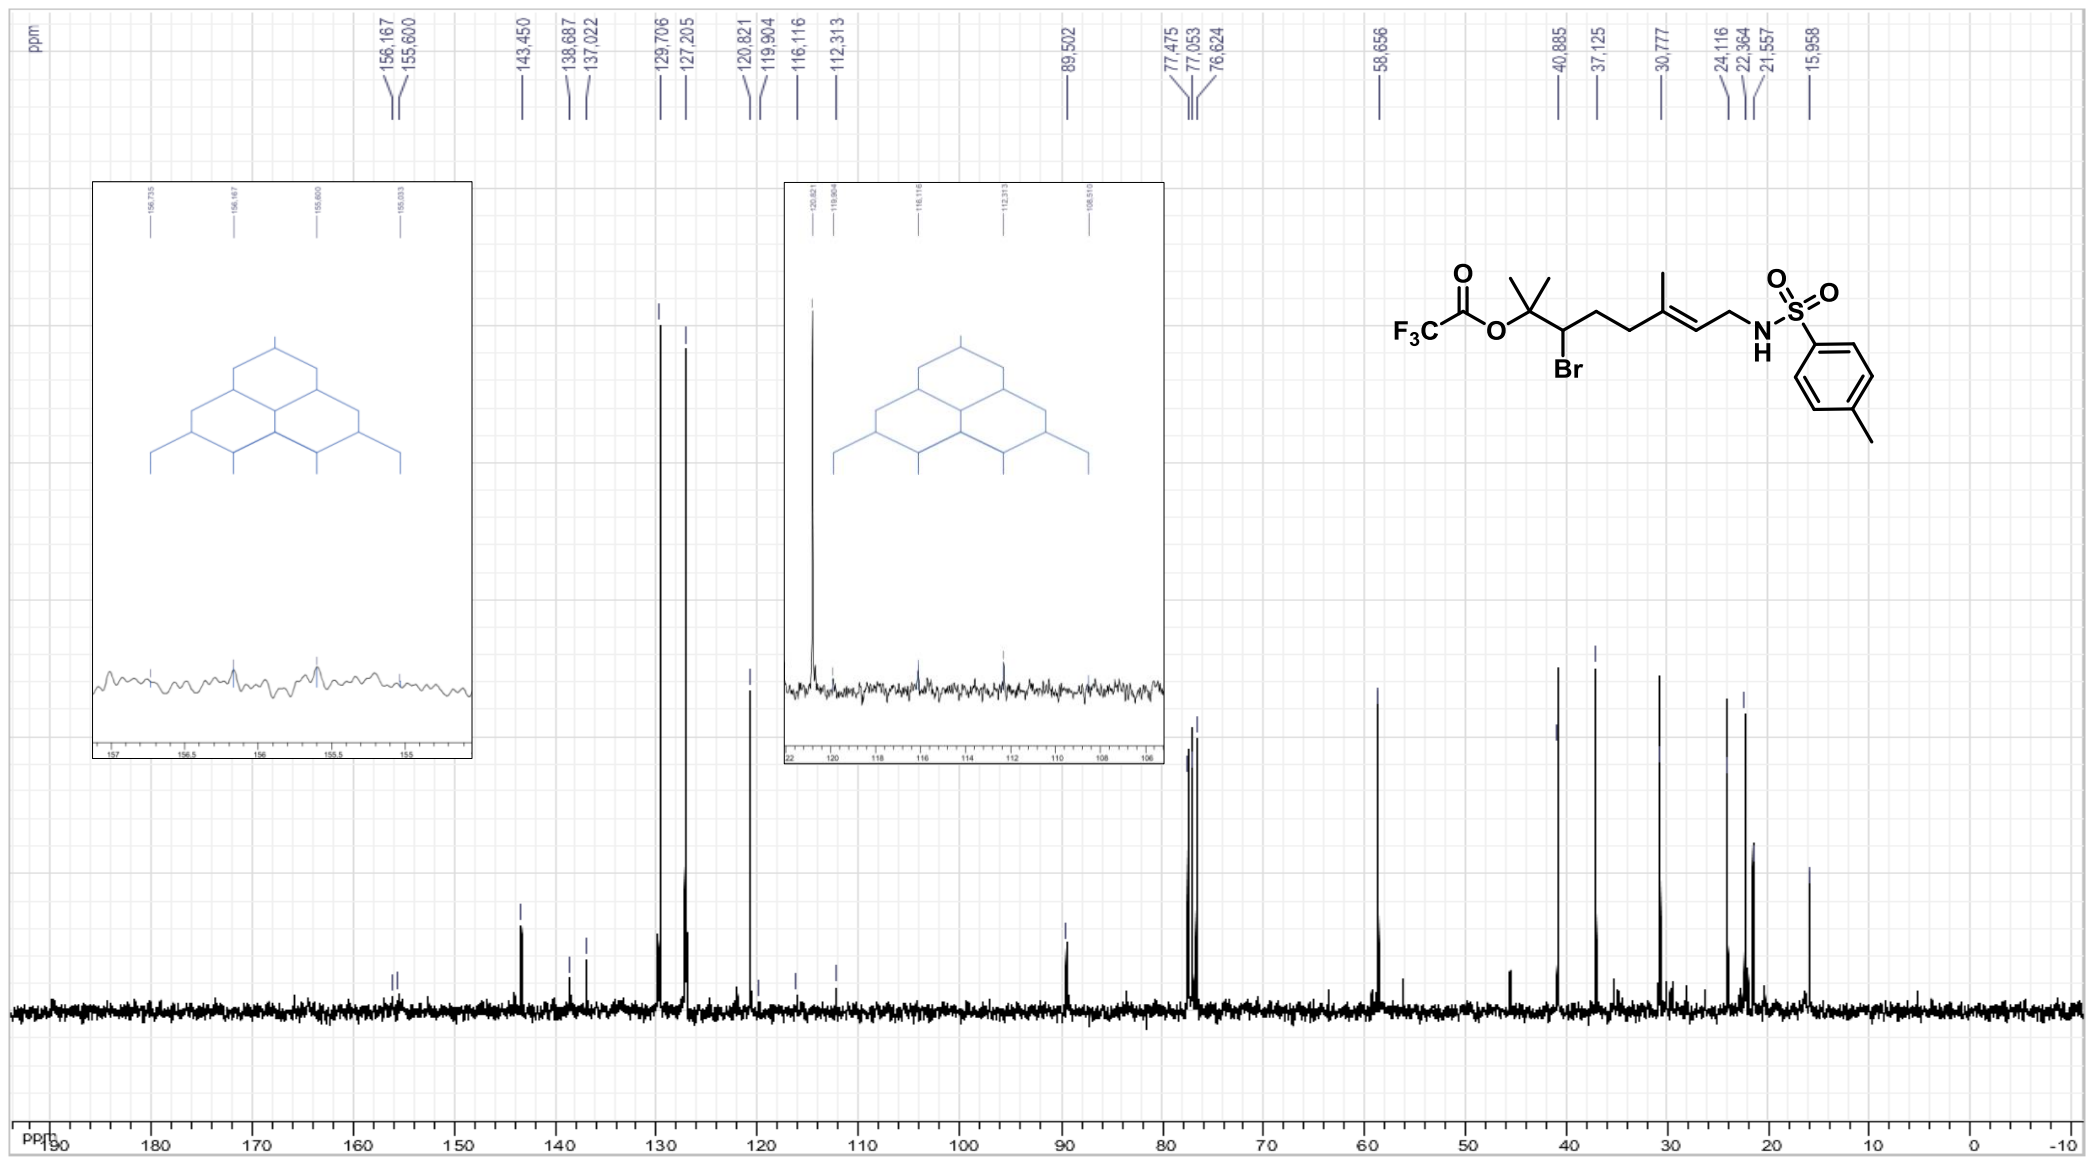

3-Bromo-2-methyl-6-methyleneoct-7-en-2-yl 2,2,2-trifluoroacetate (3e)

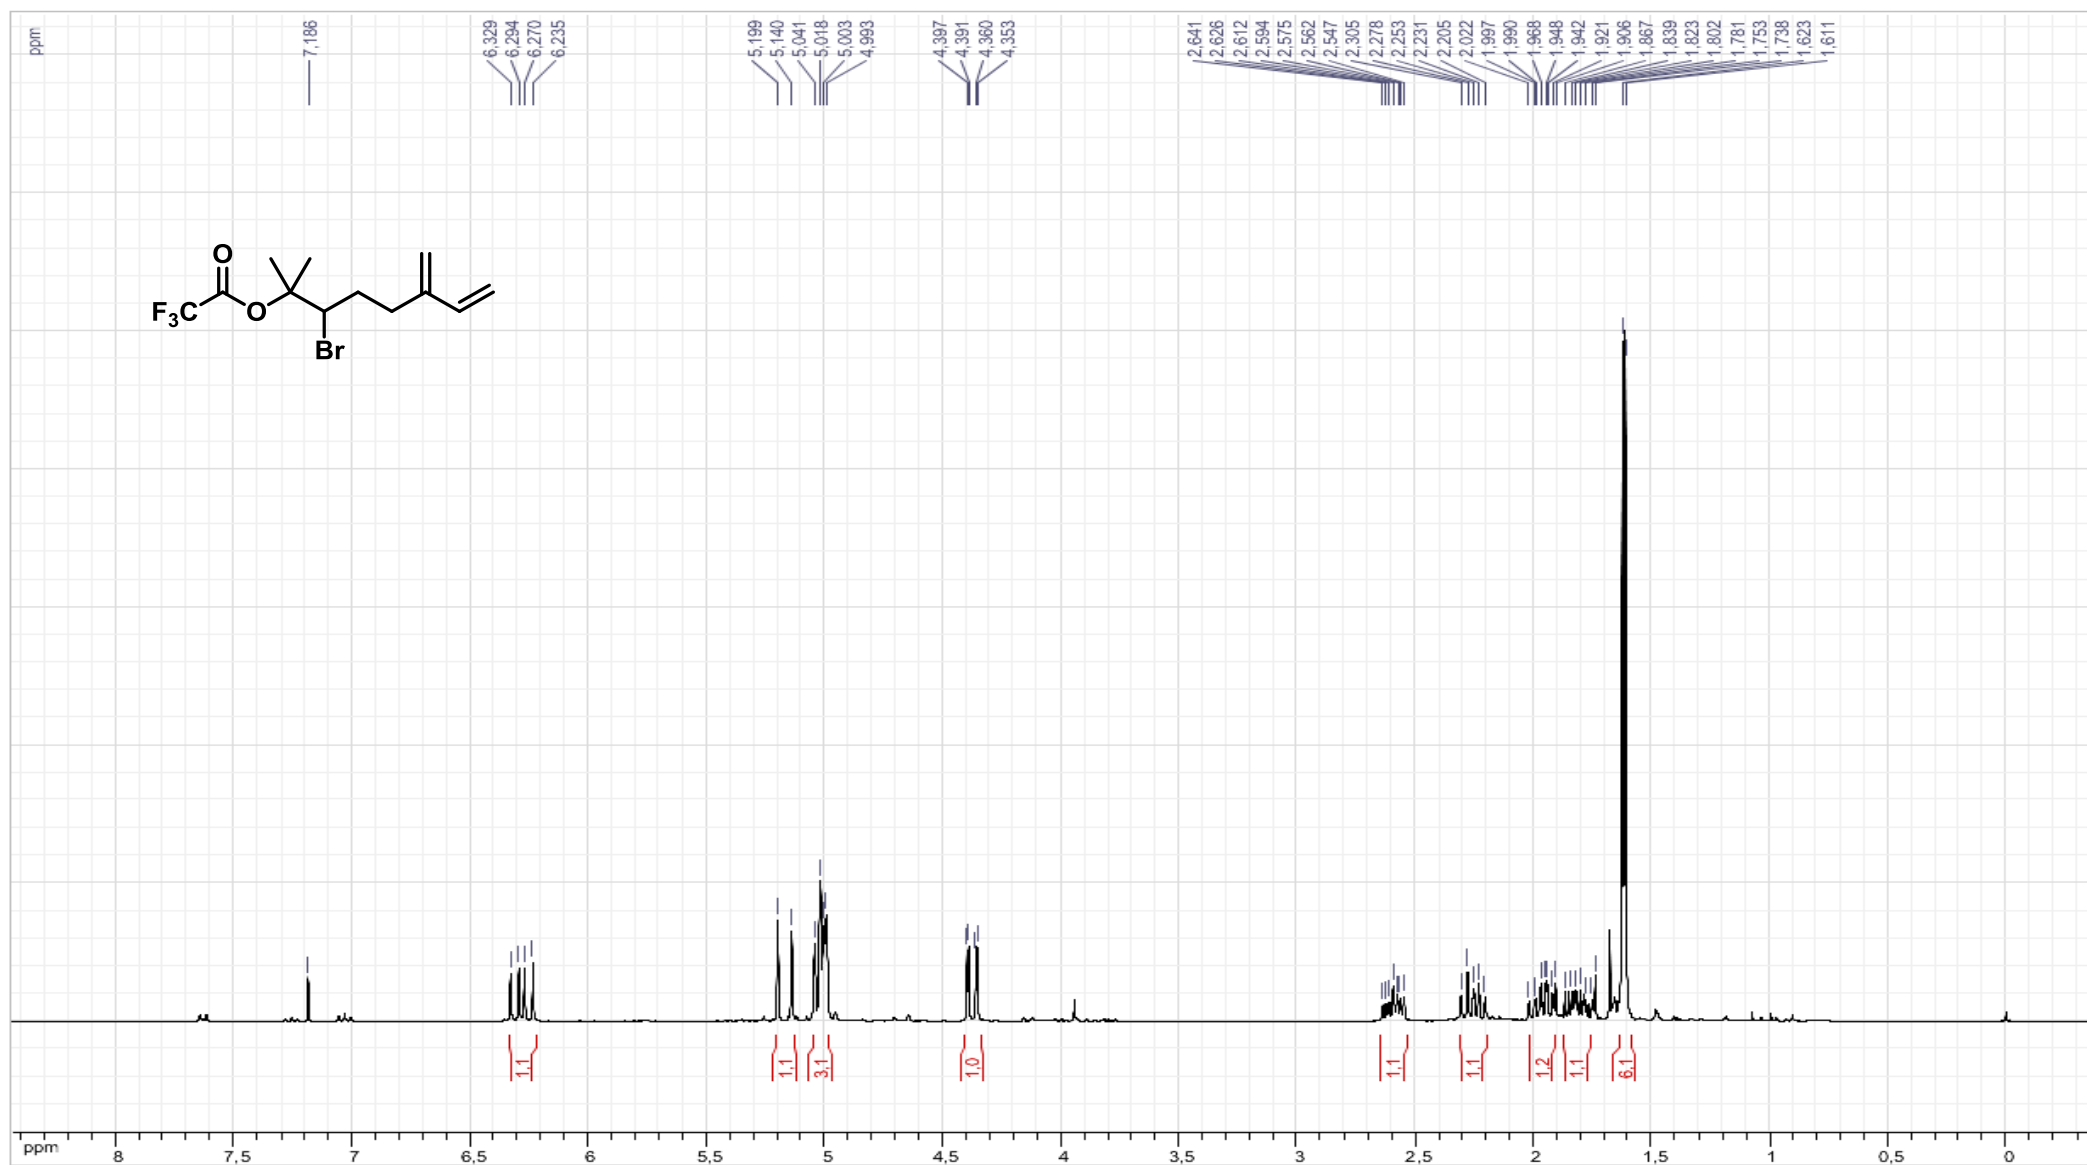

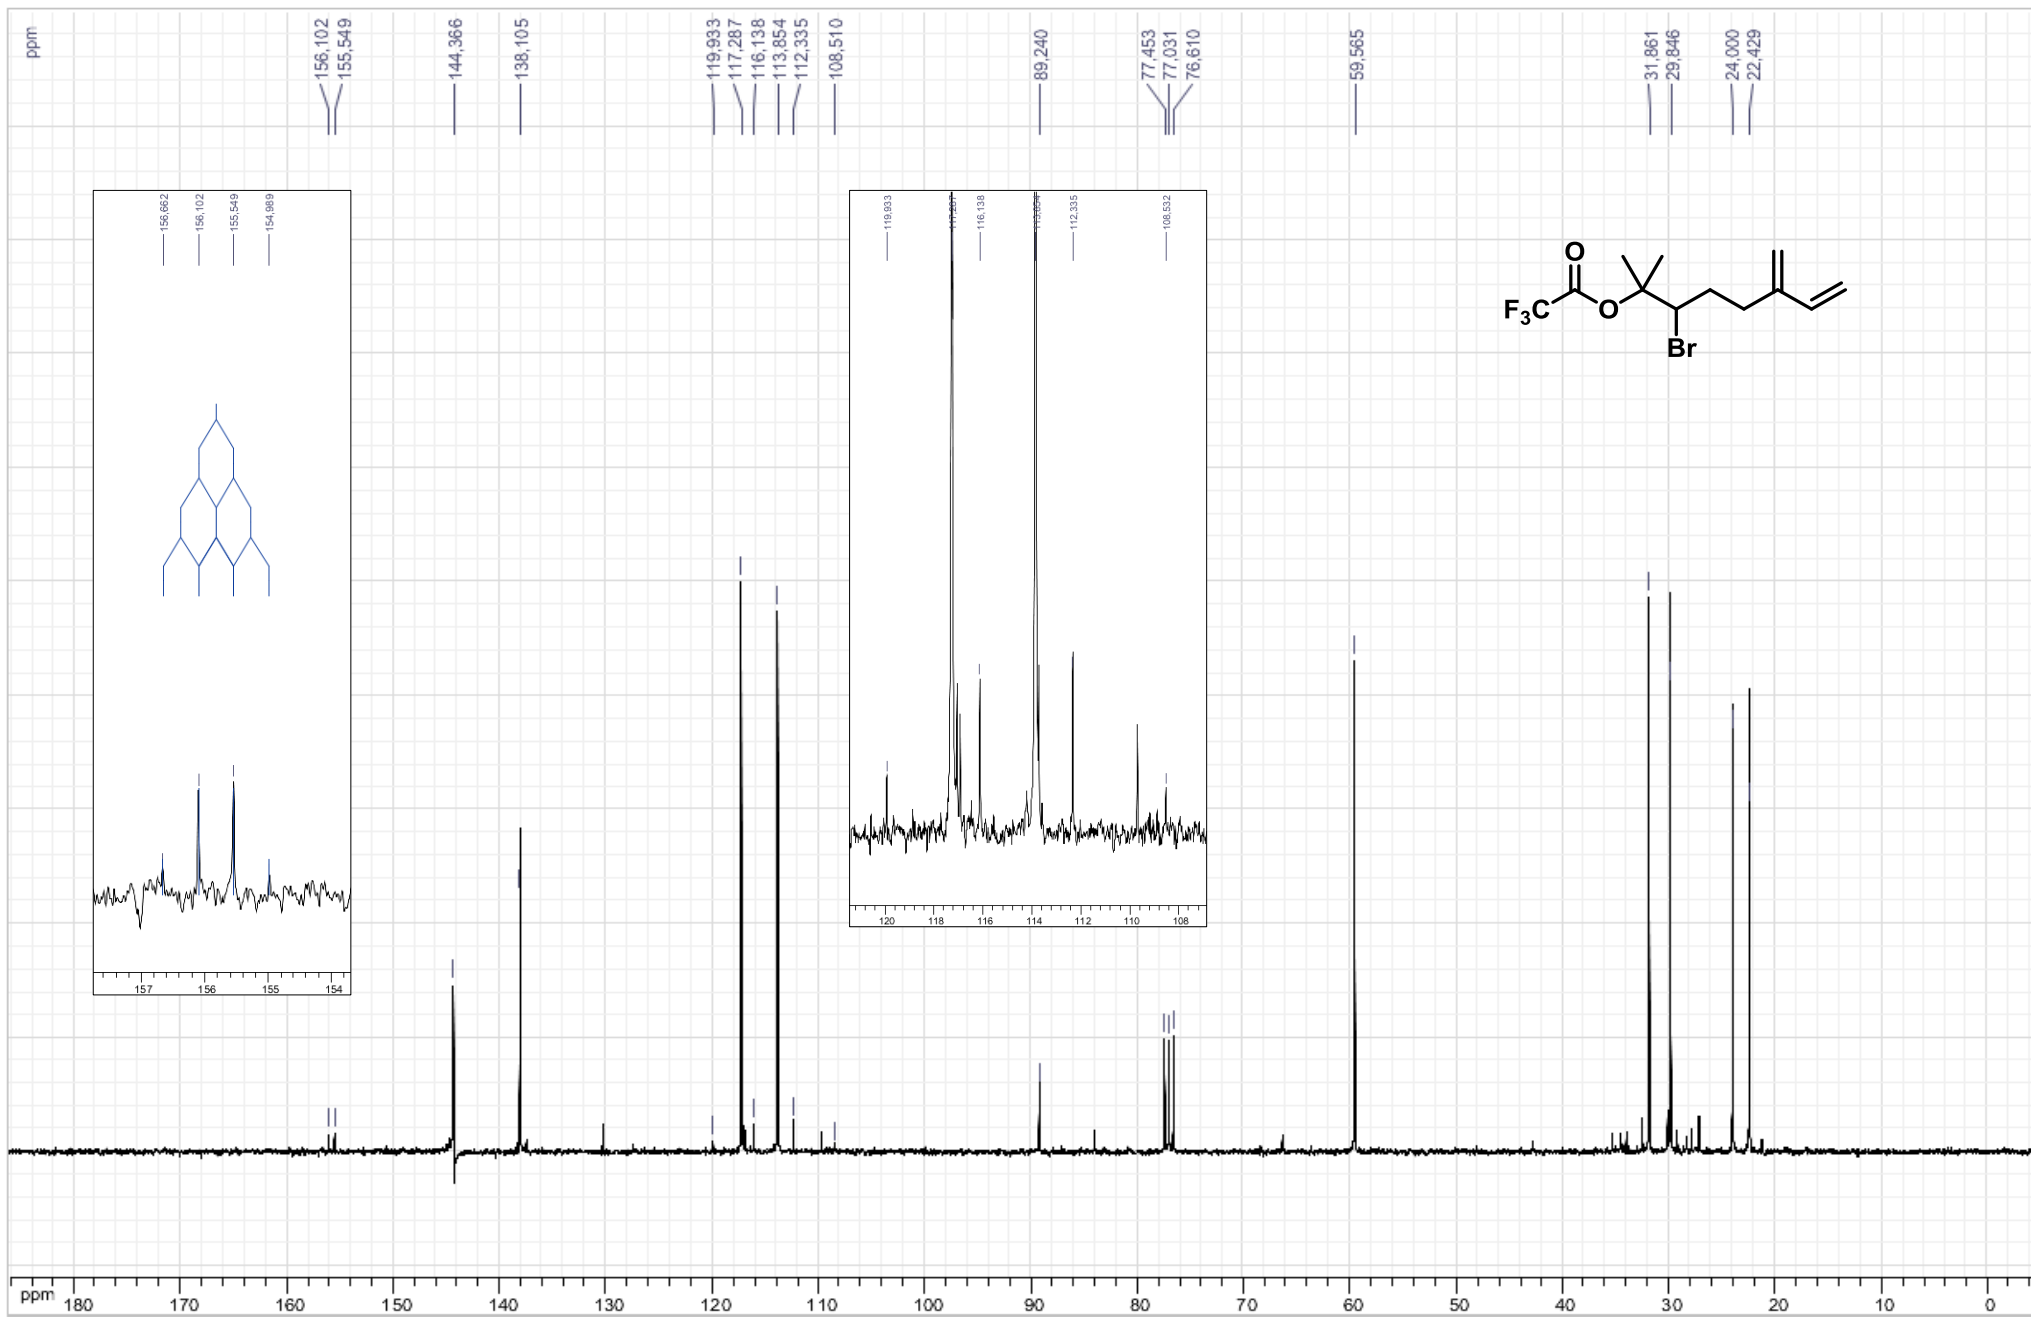

**(E)-6-Bromo-7-hydroxy-3,7-dimethyloct-2-en-1-yl acetate (4a)**

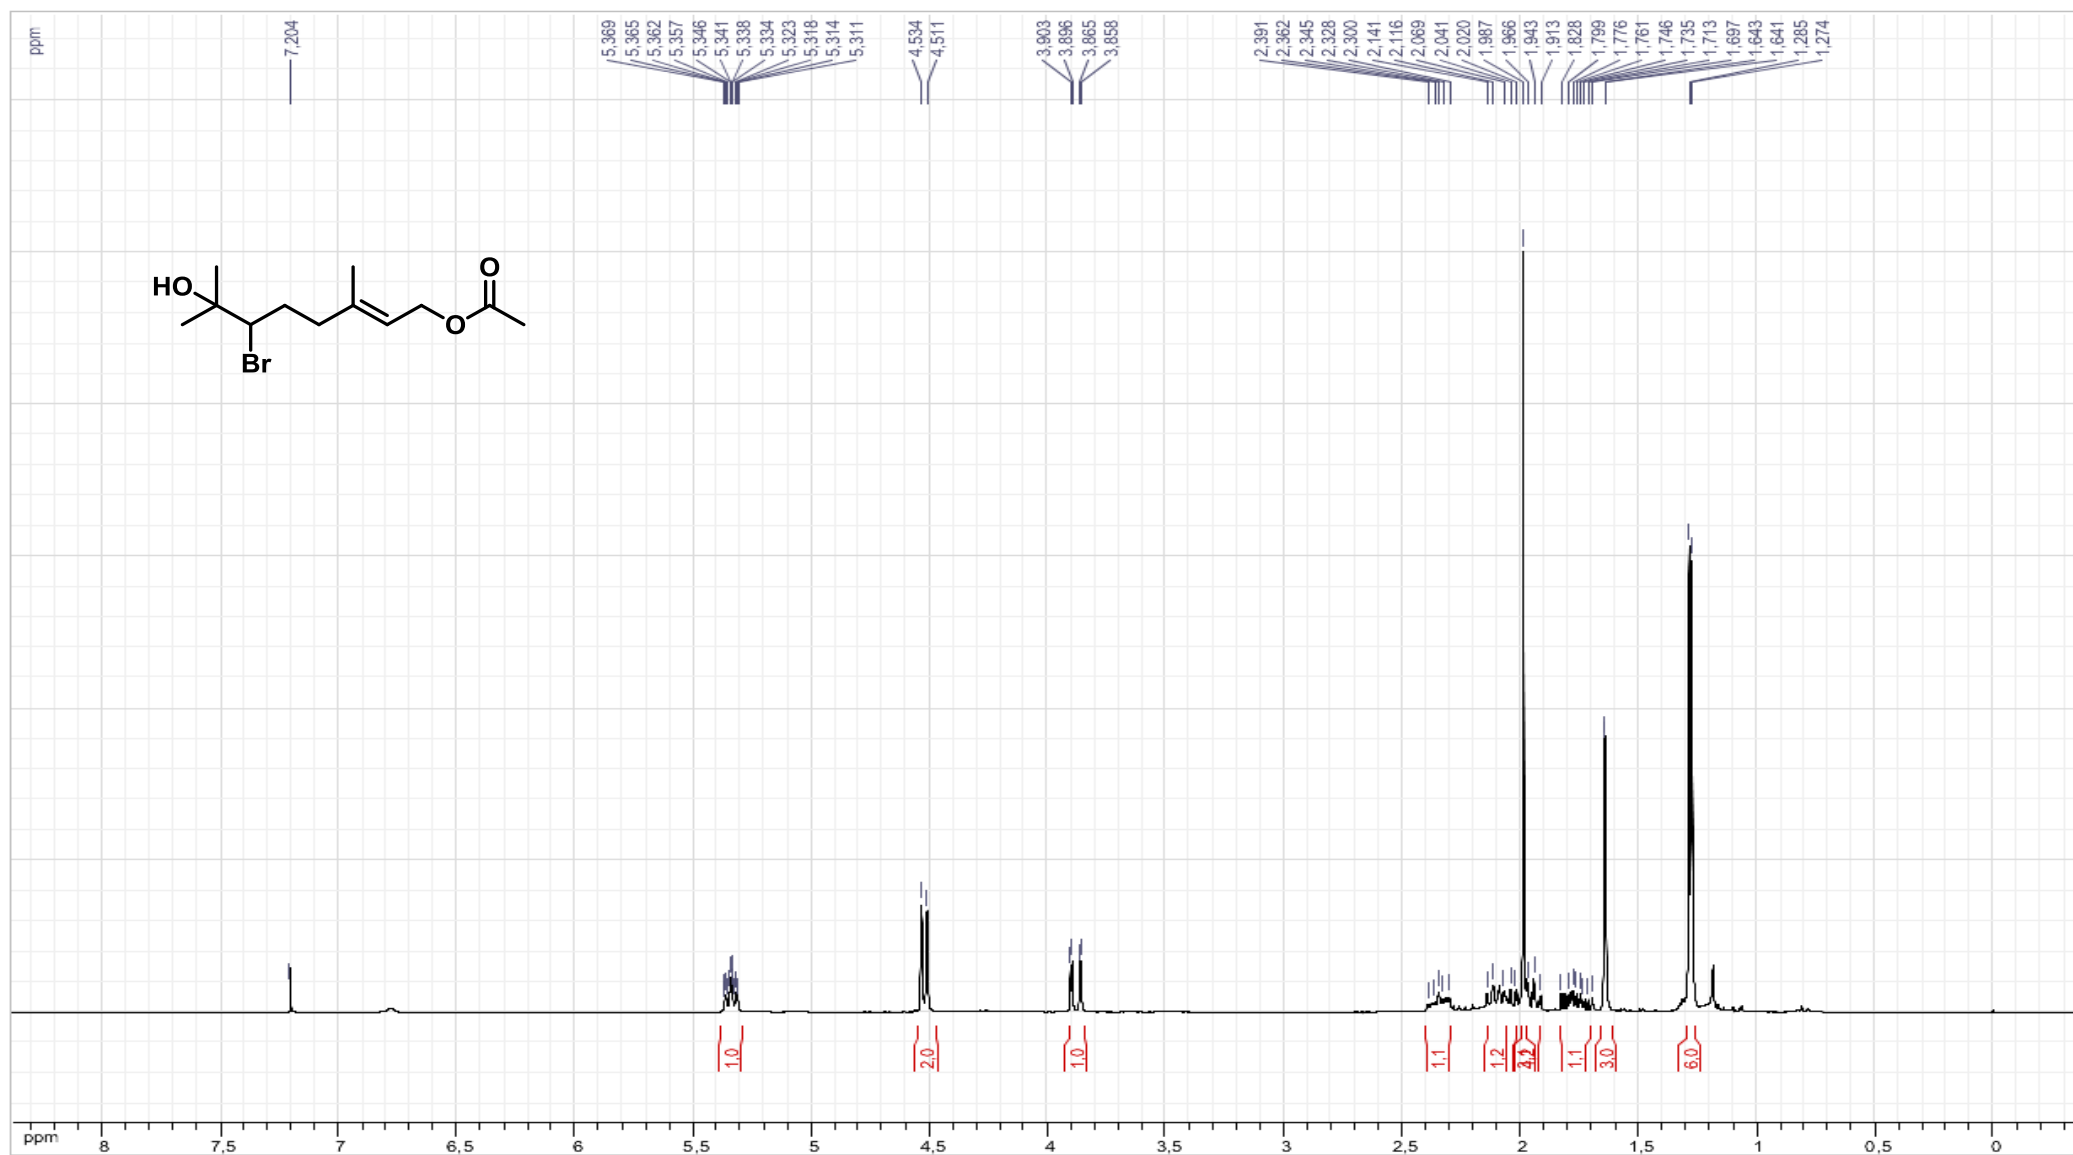



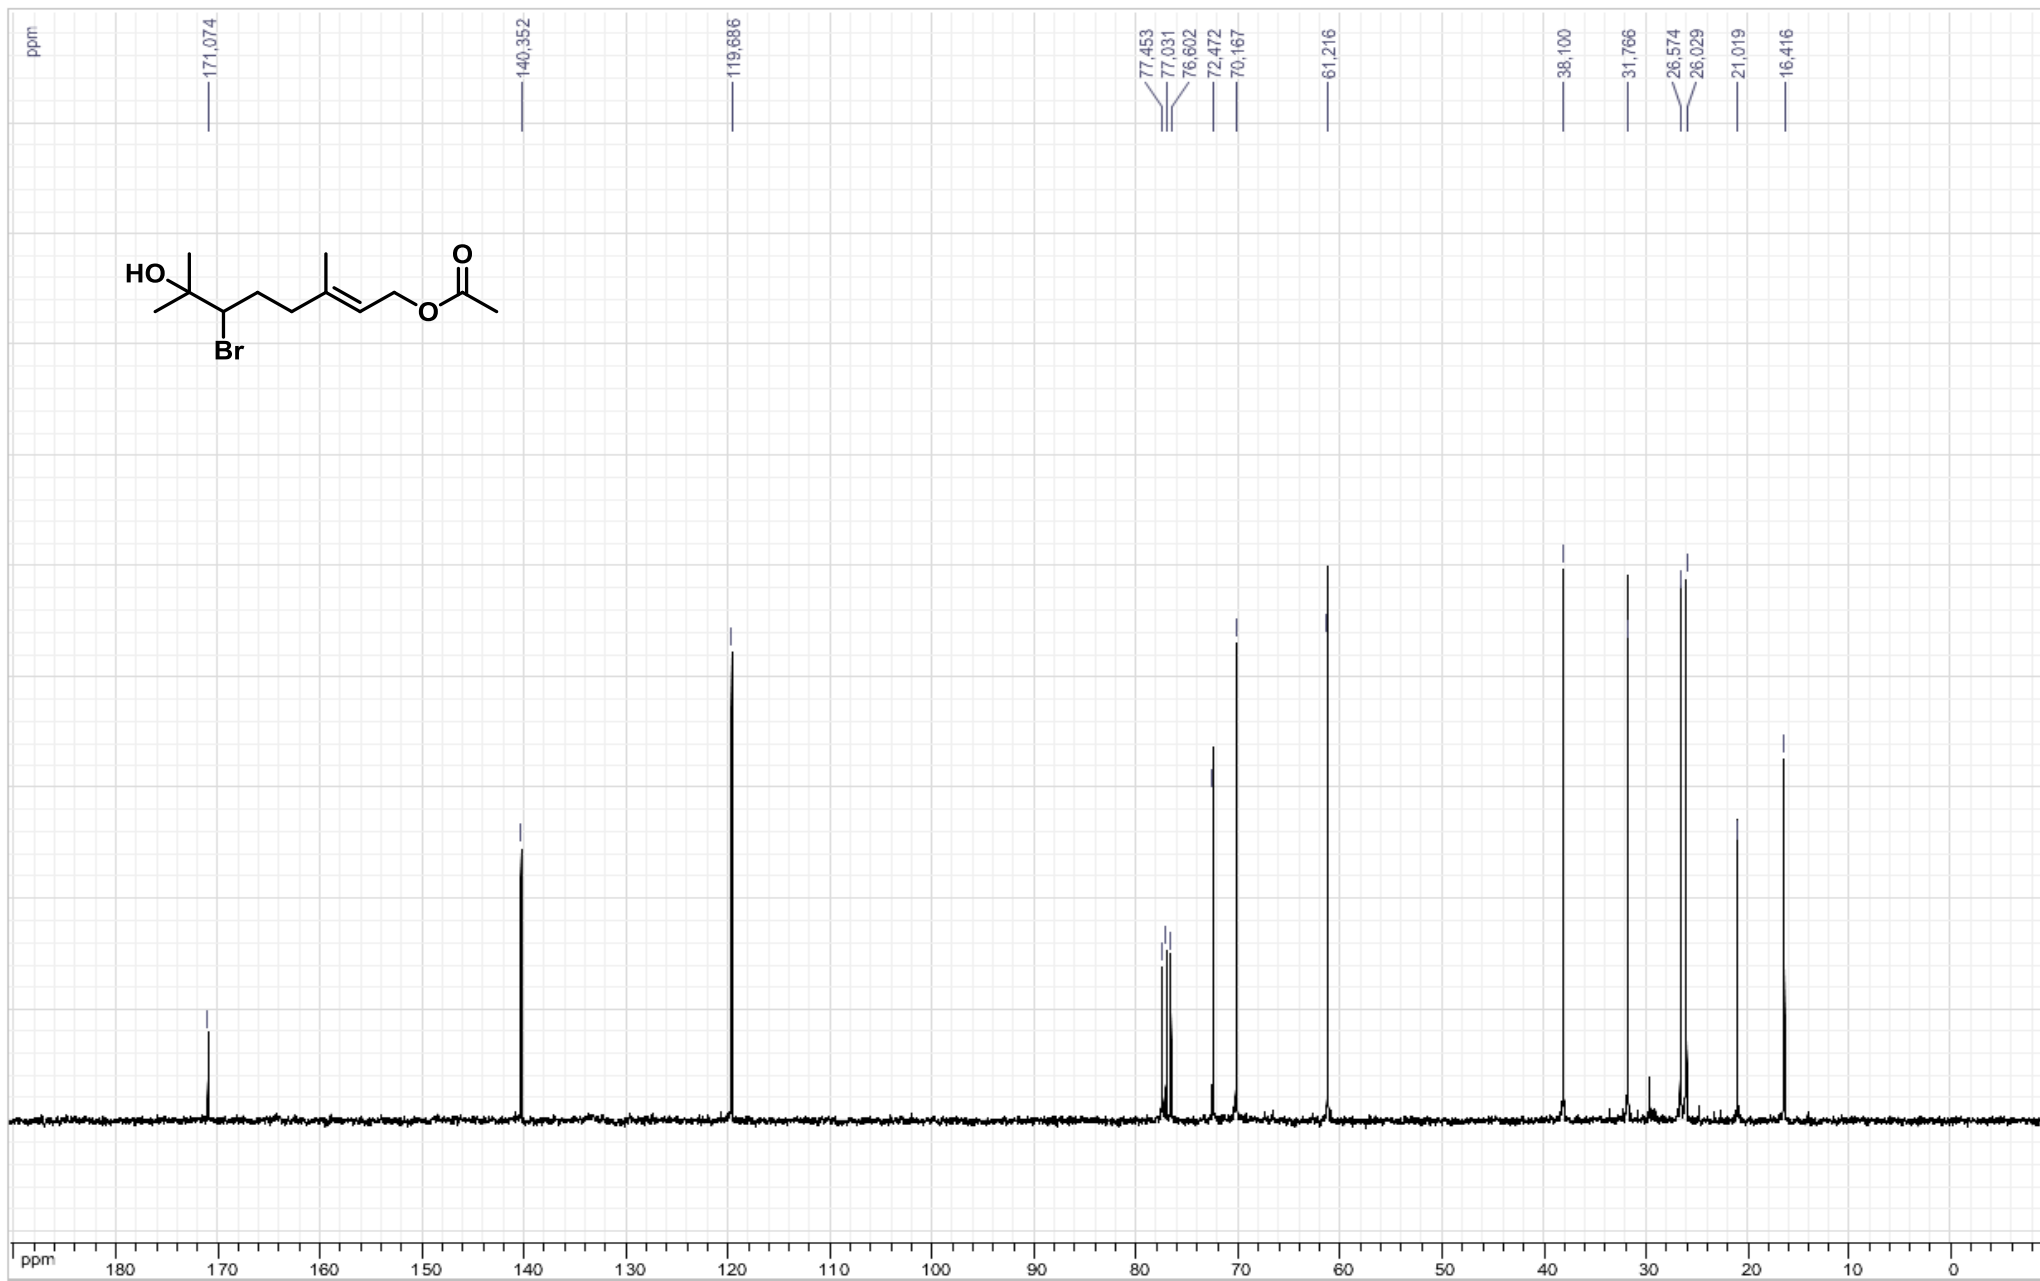

**(Z)-6-Bromo-7-hydroxy-3,7-dimethyloct-2-en-1-yl acetate (4b)**

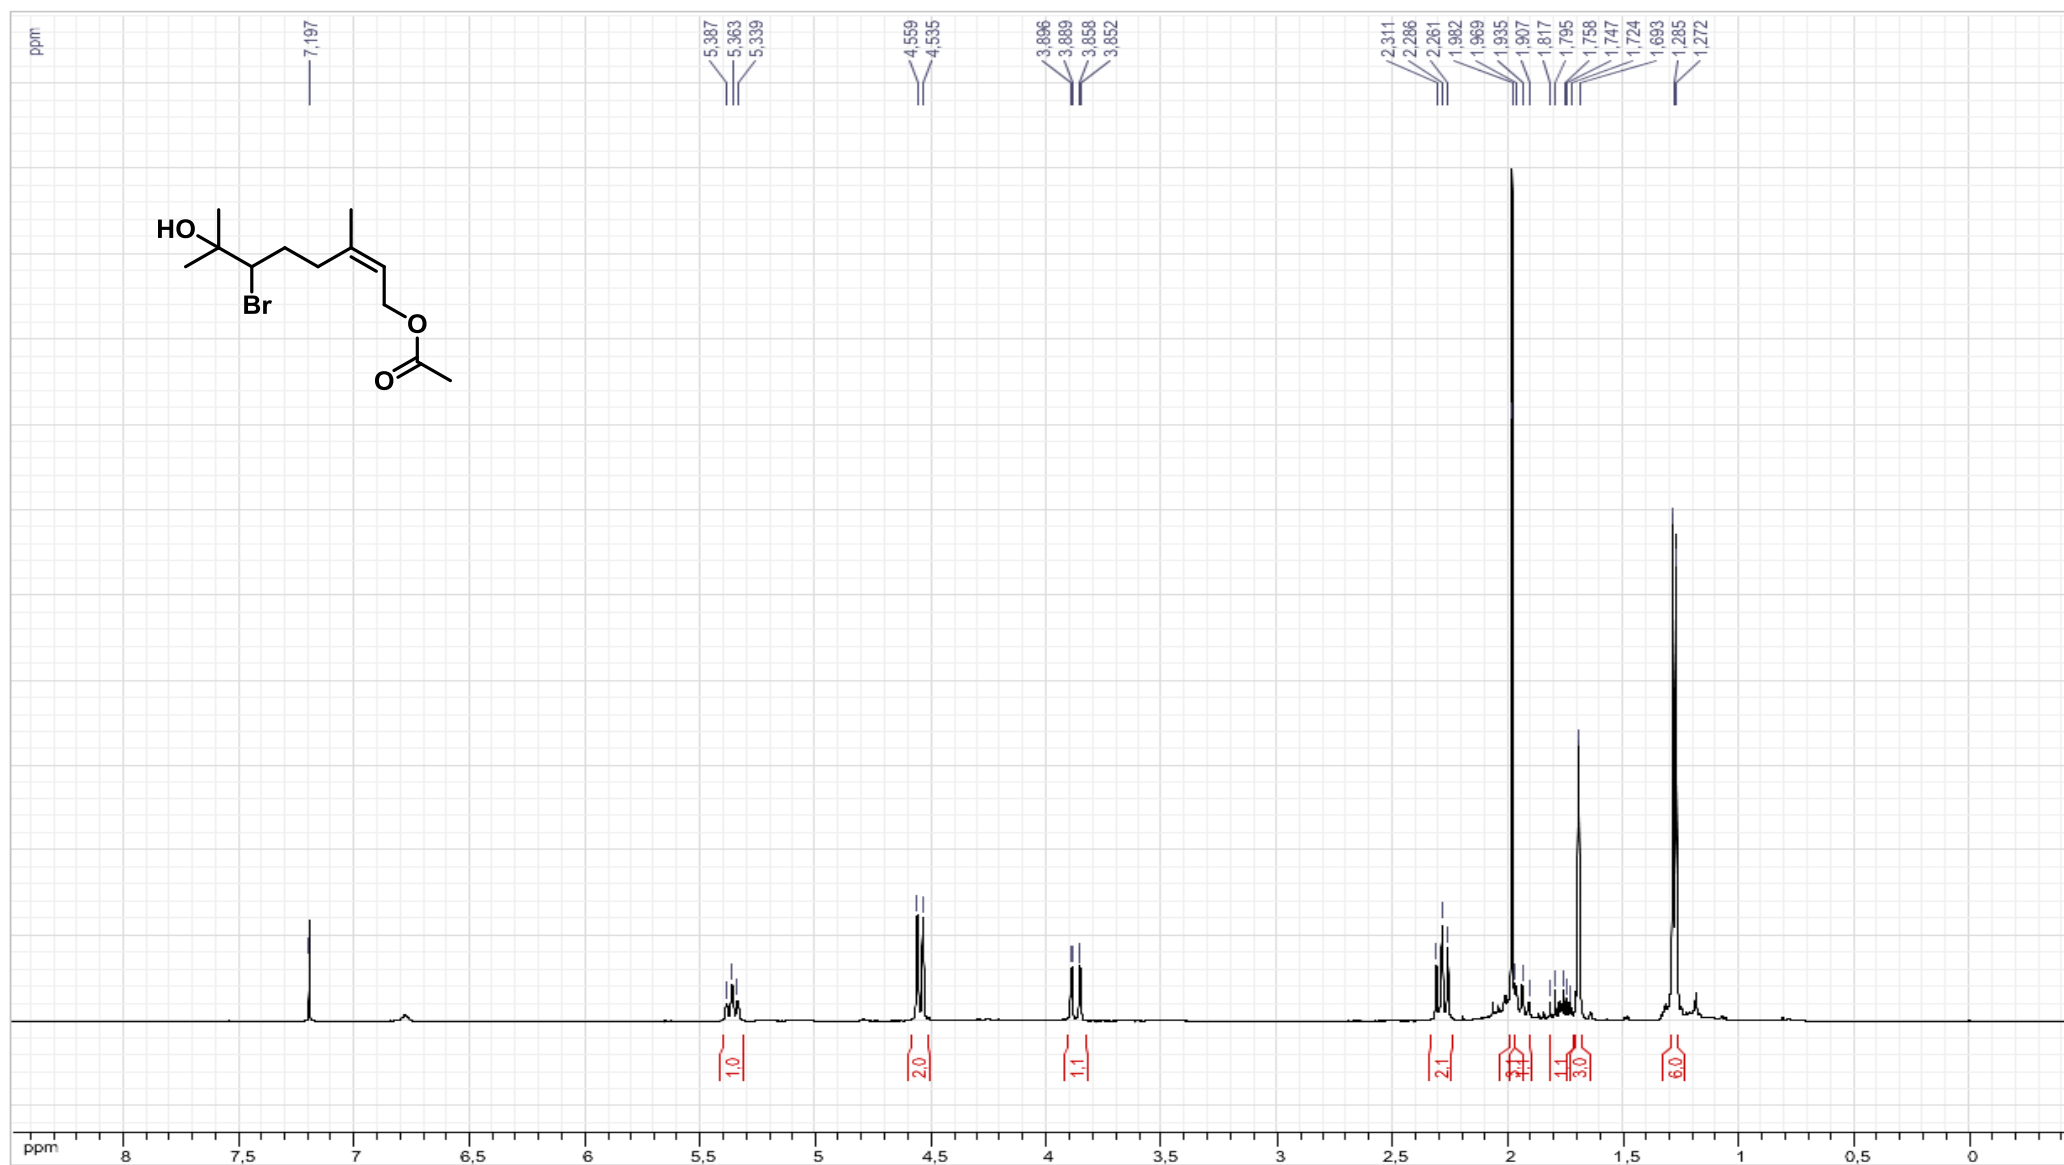

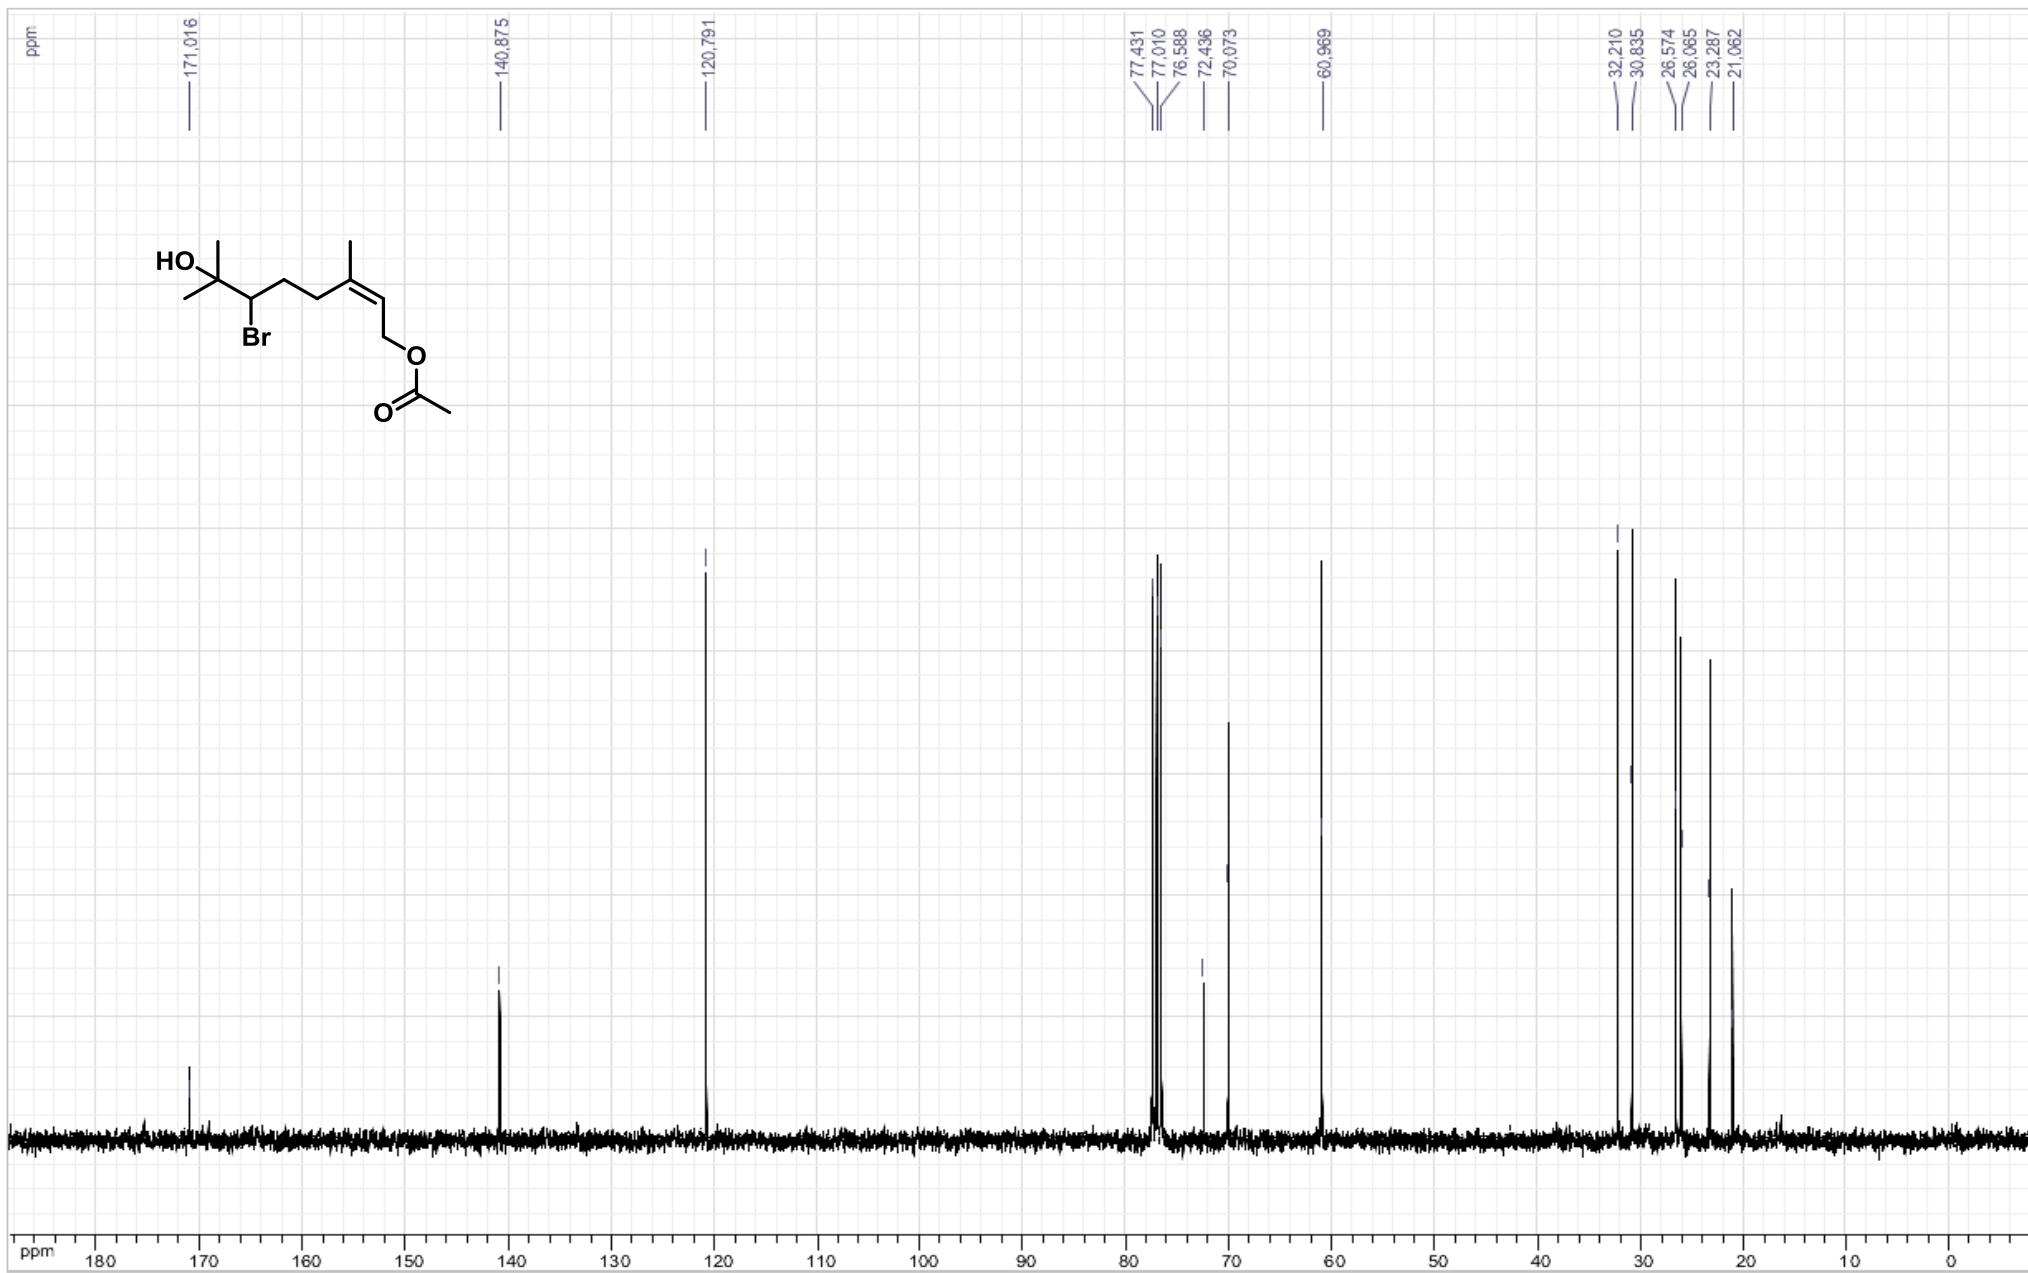

**(E)-6-Bromo-3,7-dimethyloct-2-ene-1,7-diol (4c)**

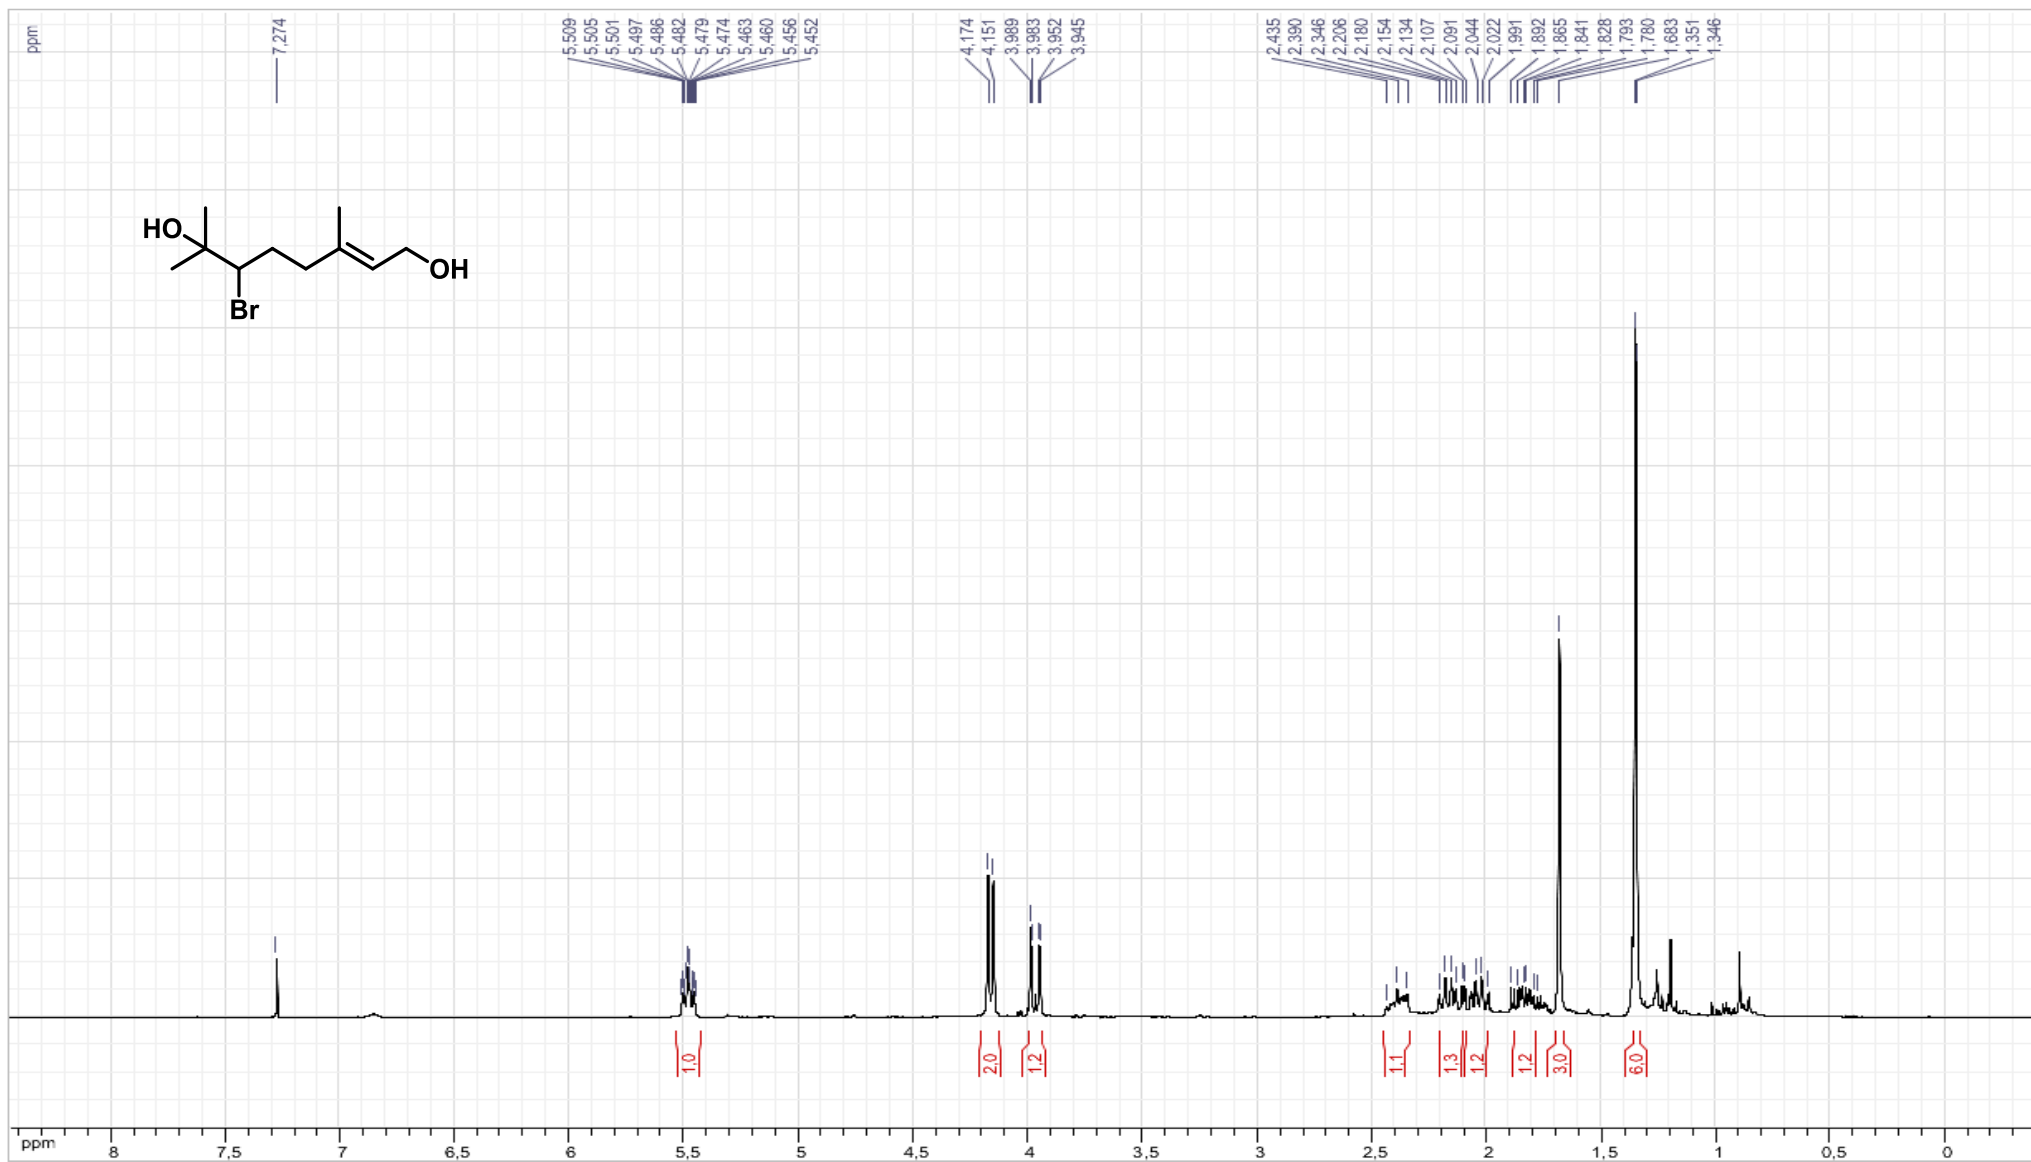

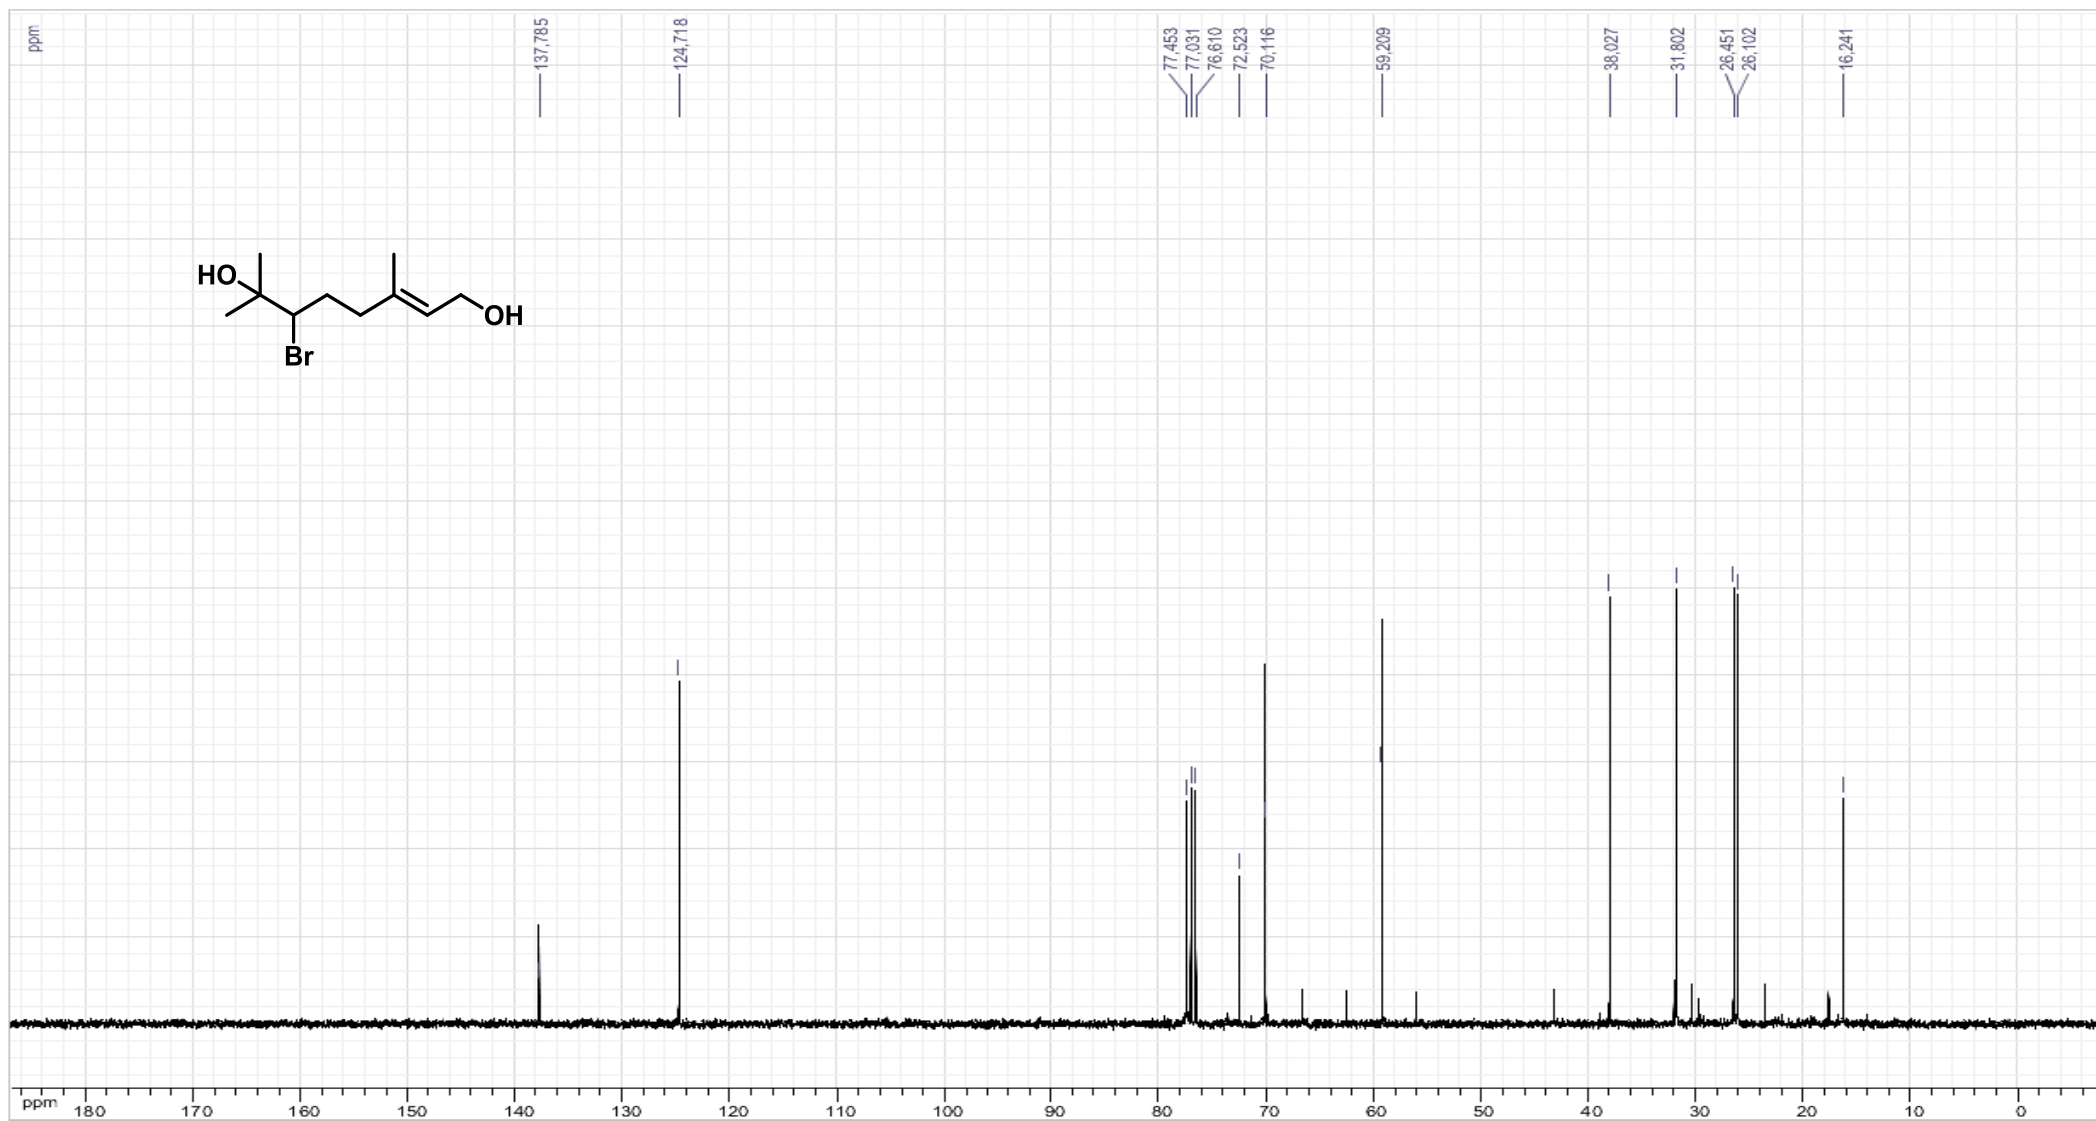

**(E)-N-(6-Bromo-7-hydroxy-3,7-dimethyloct-2-en-1-yl)-4-methylbenzenesulfonamide (4d)**

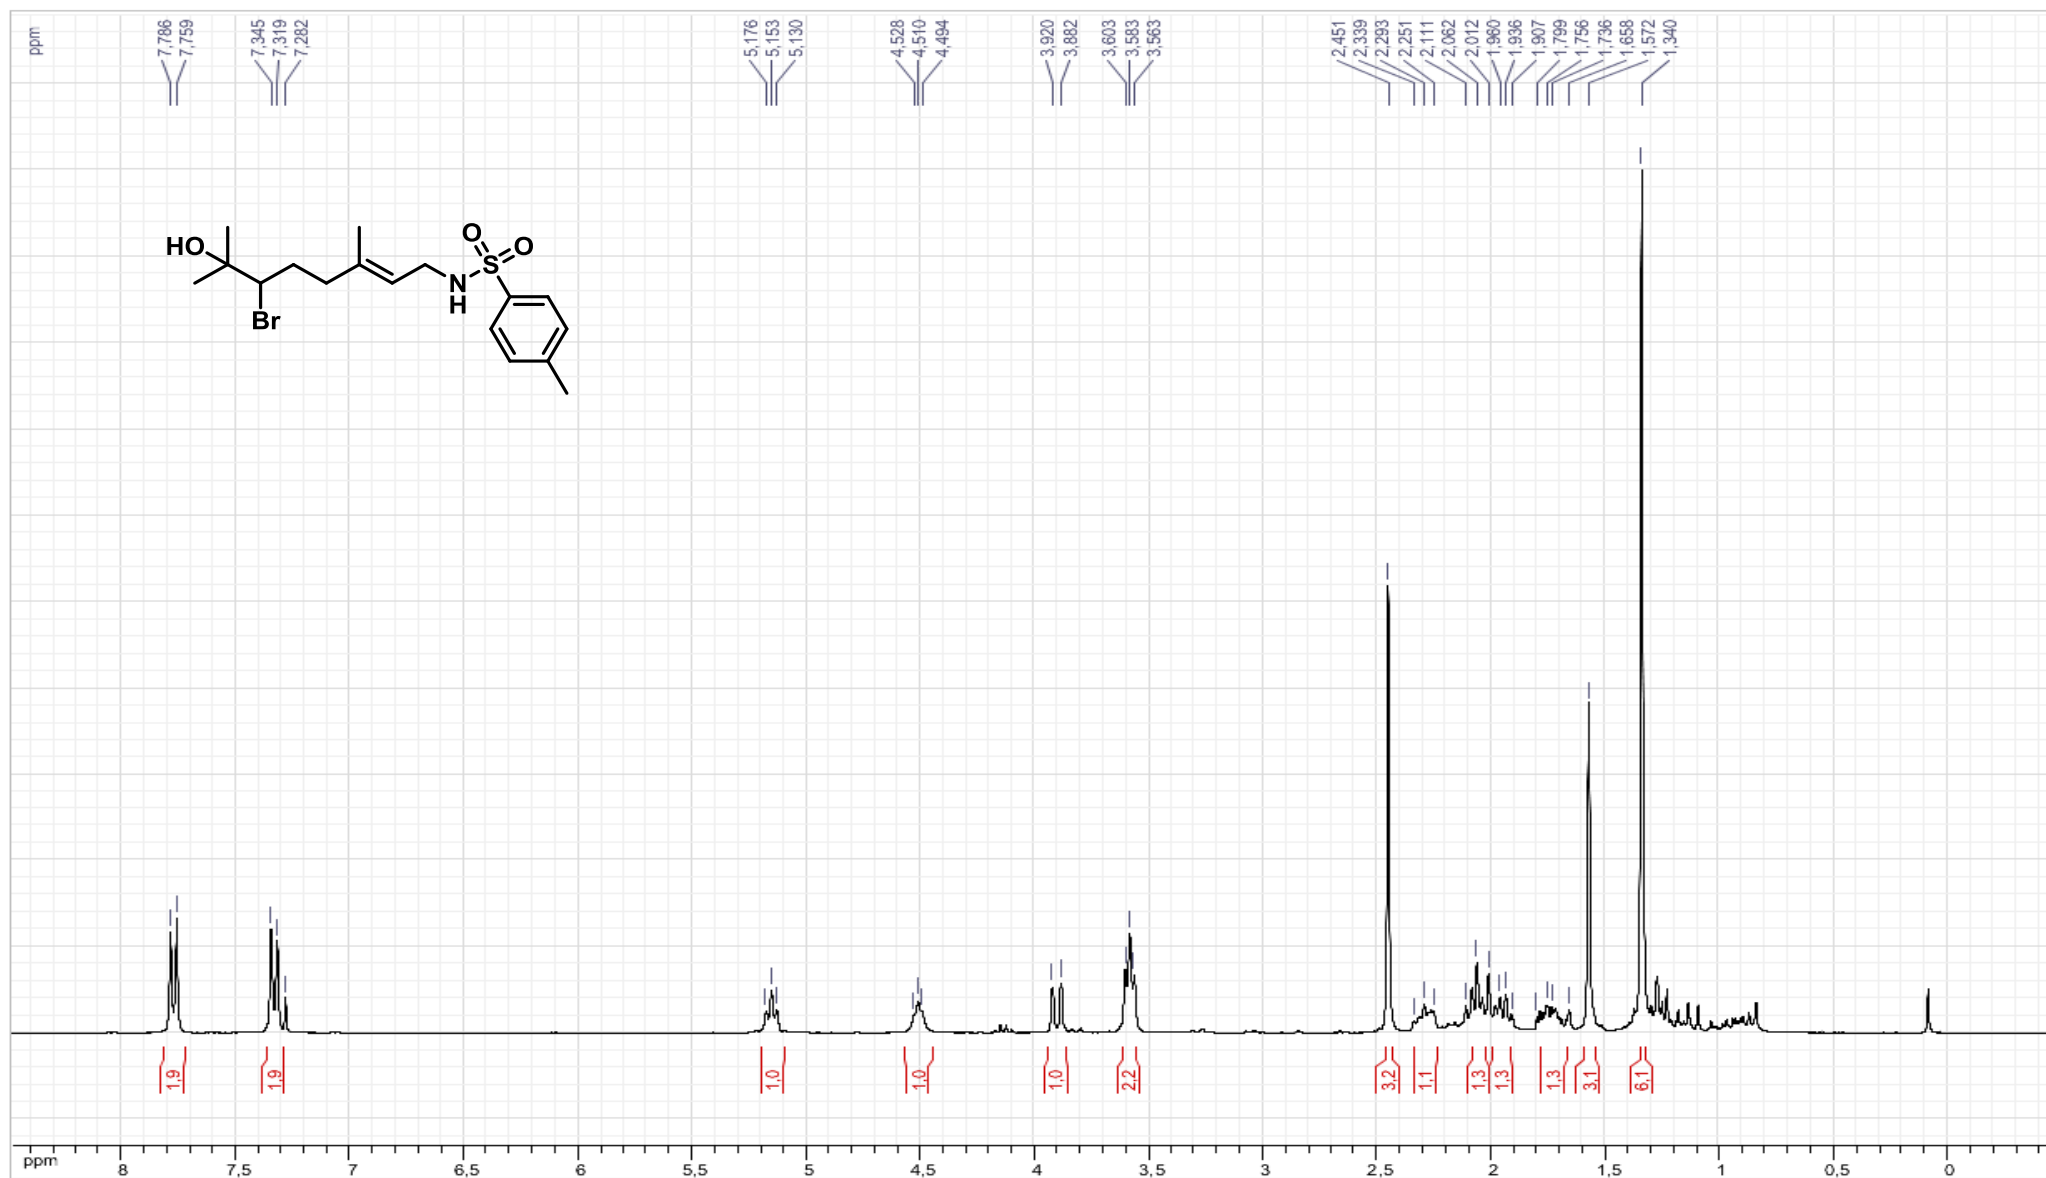

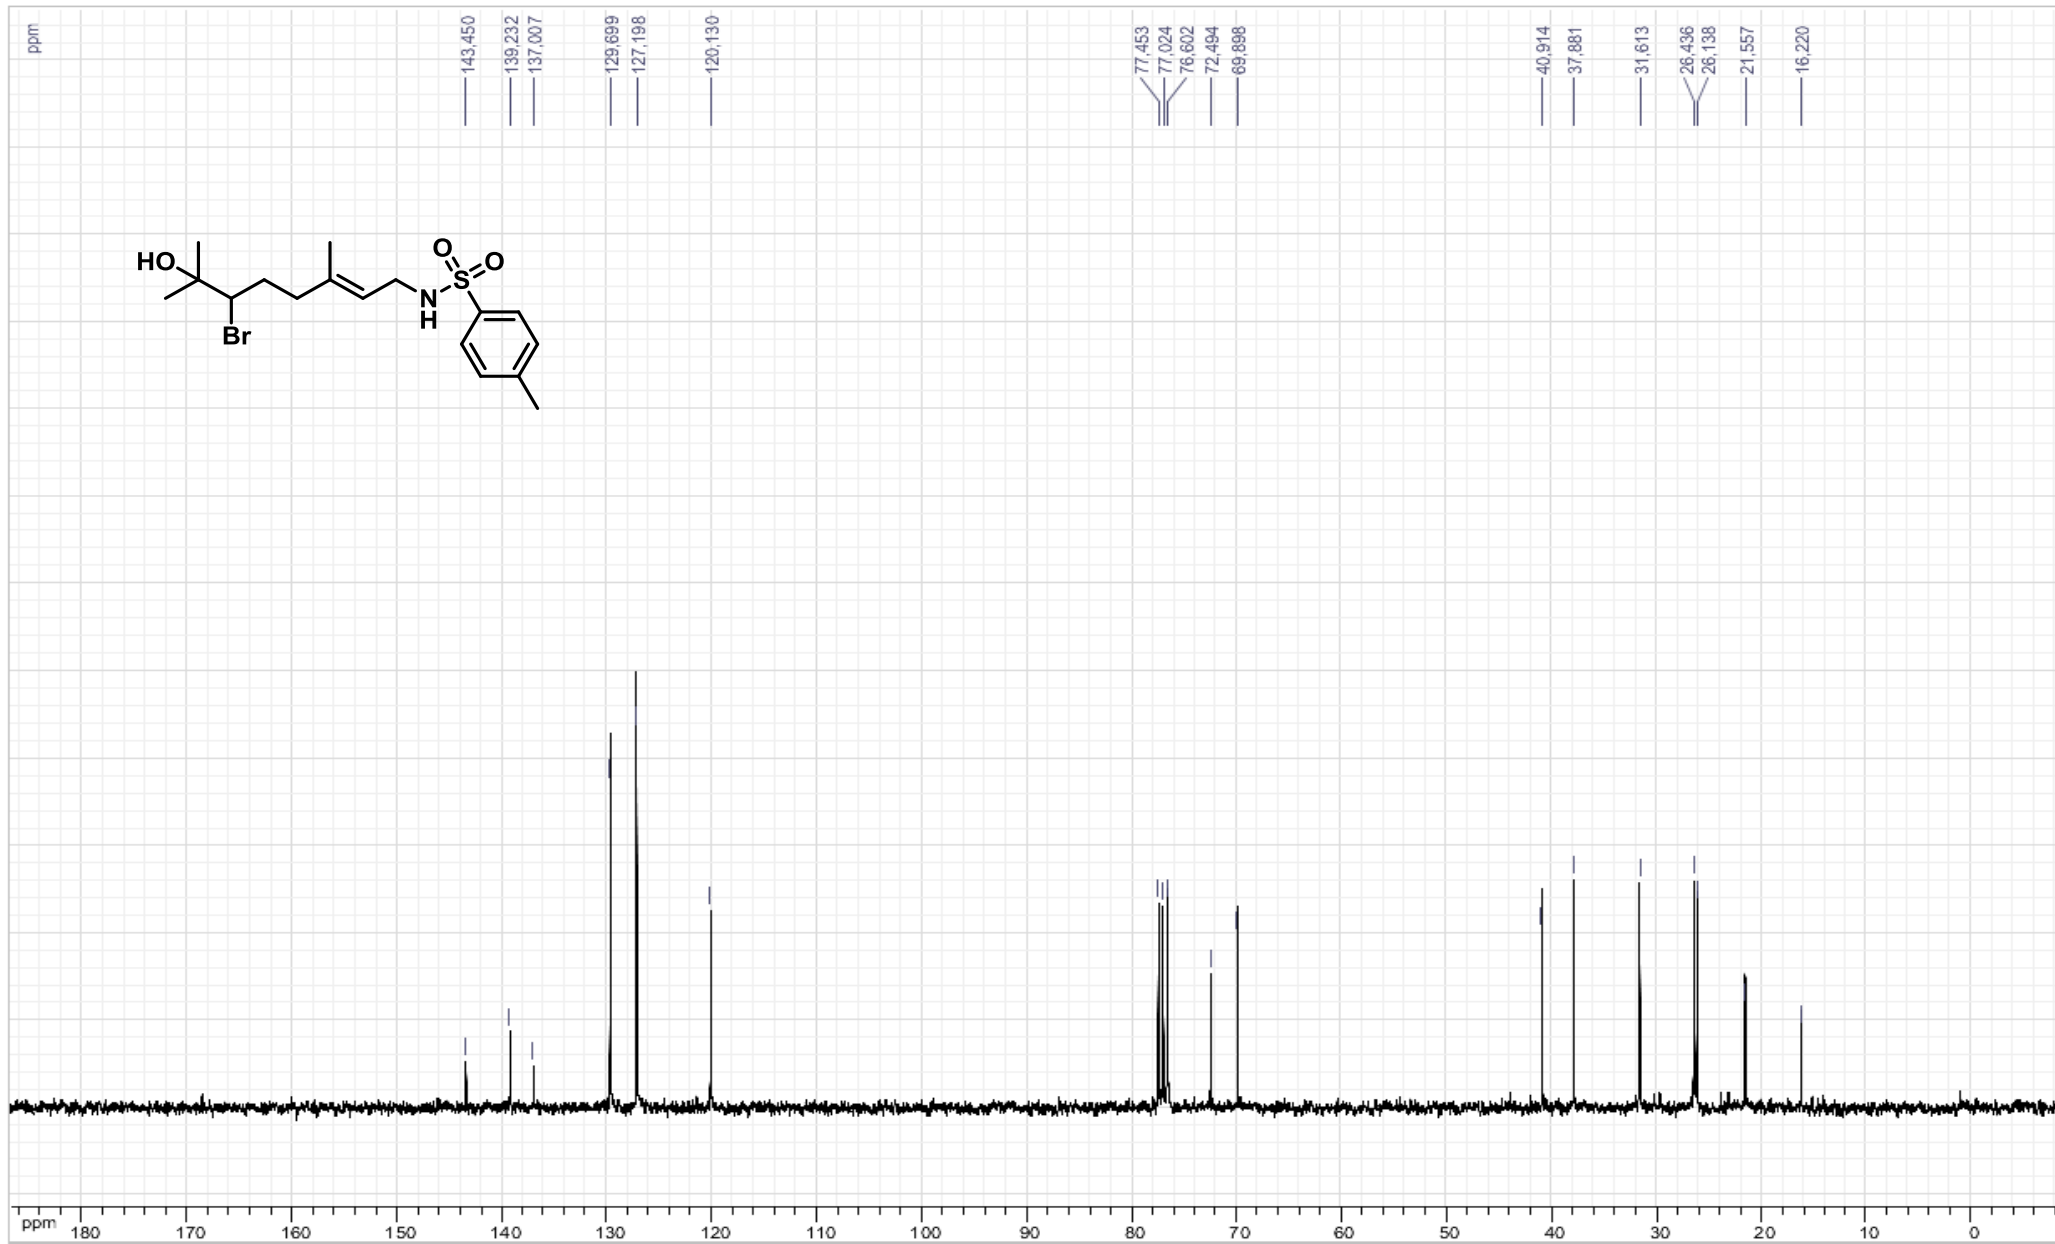

3-Bromo-2-methyl-6-methyleneoct-7-en-2-ol (4e)

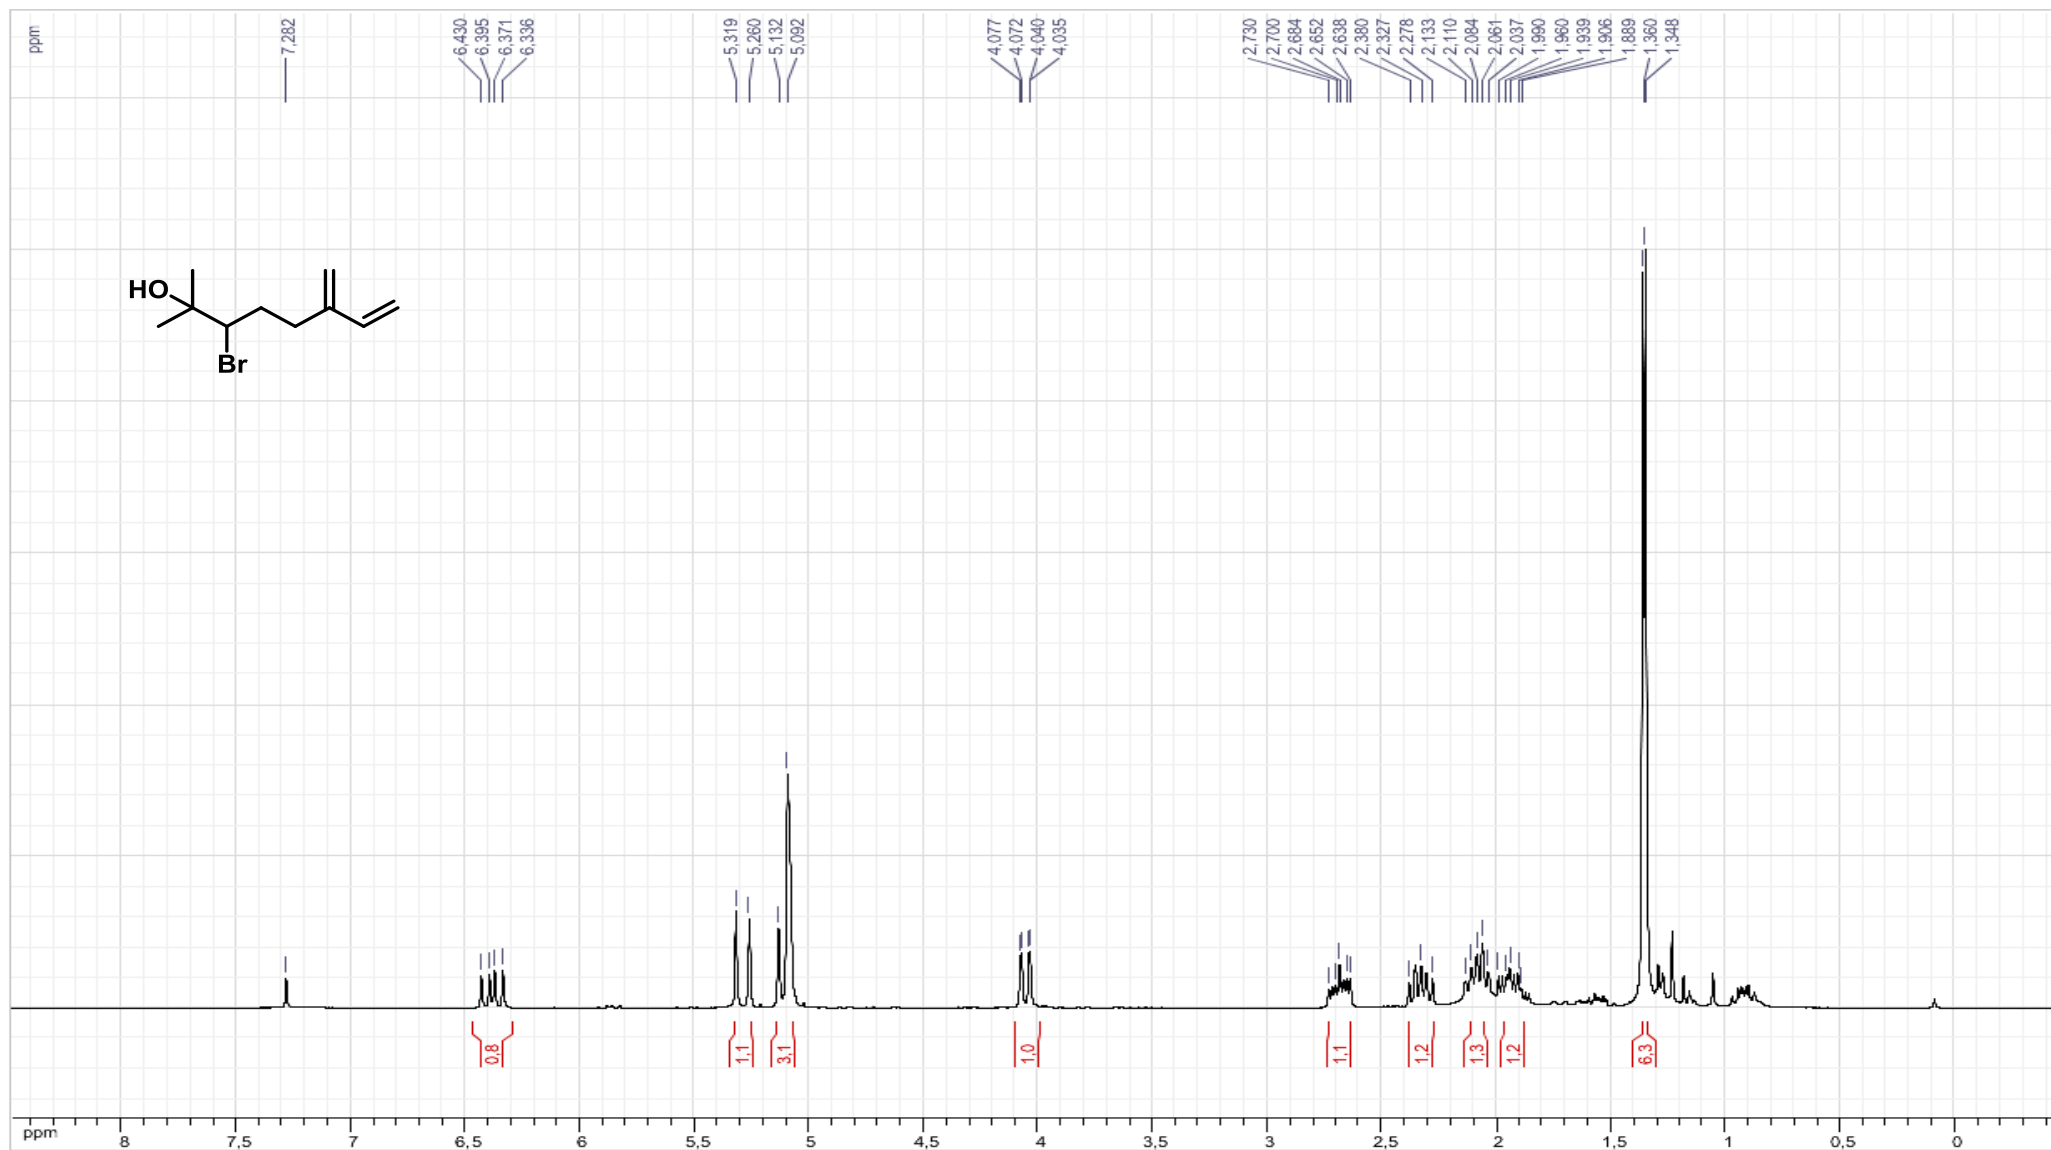



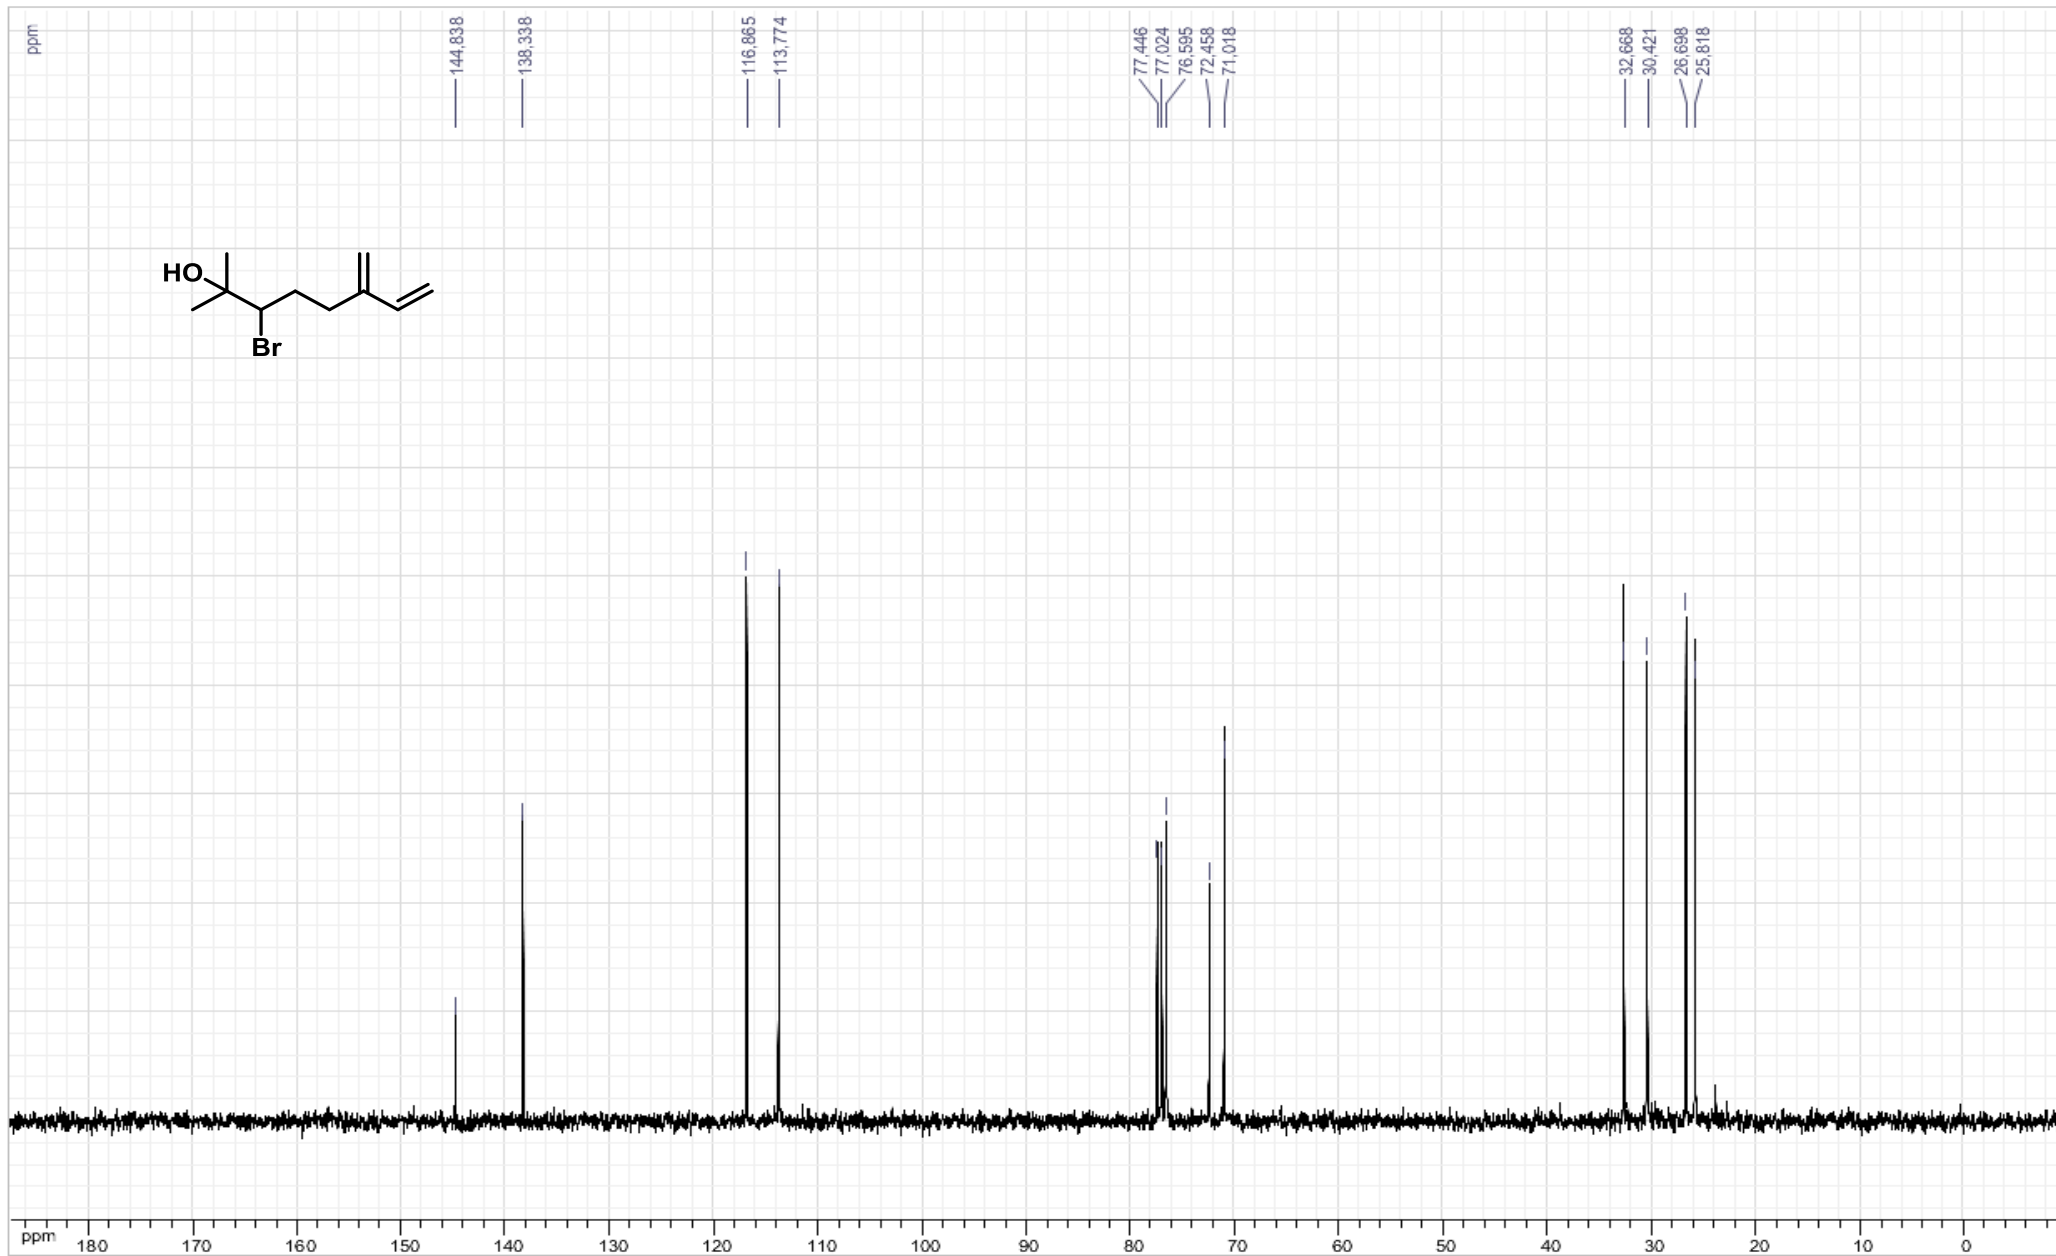

**(E)-8-Acetoxy-3-iodo-2,6-dimethyloct-6-en-2-yl 2,2,2-trifluoroacetate (5a)**

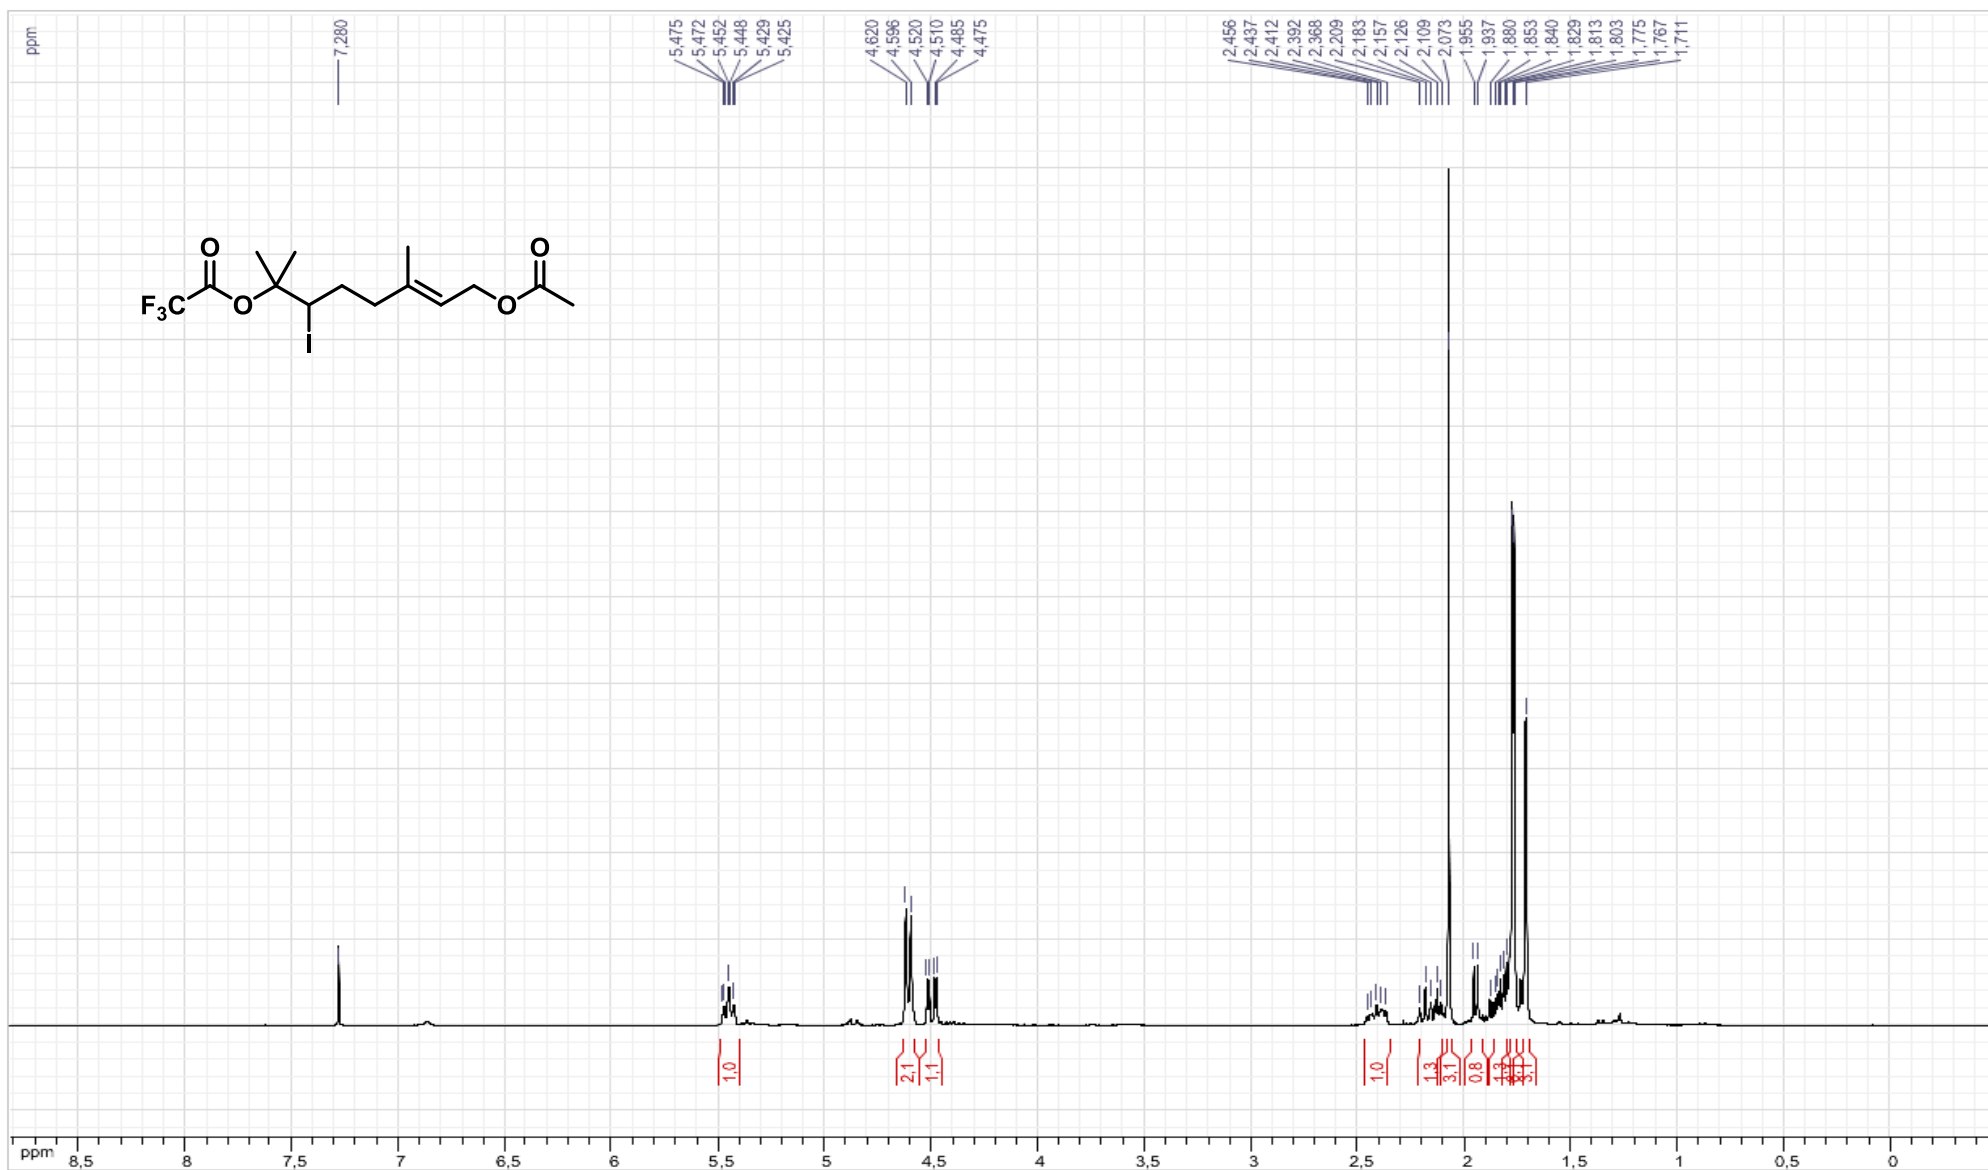

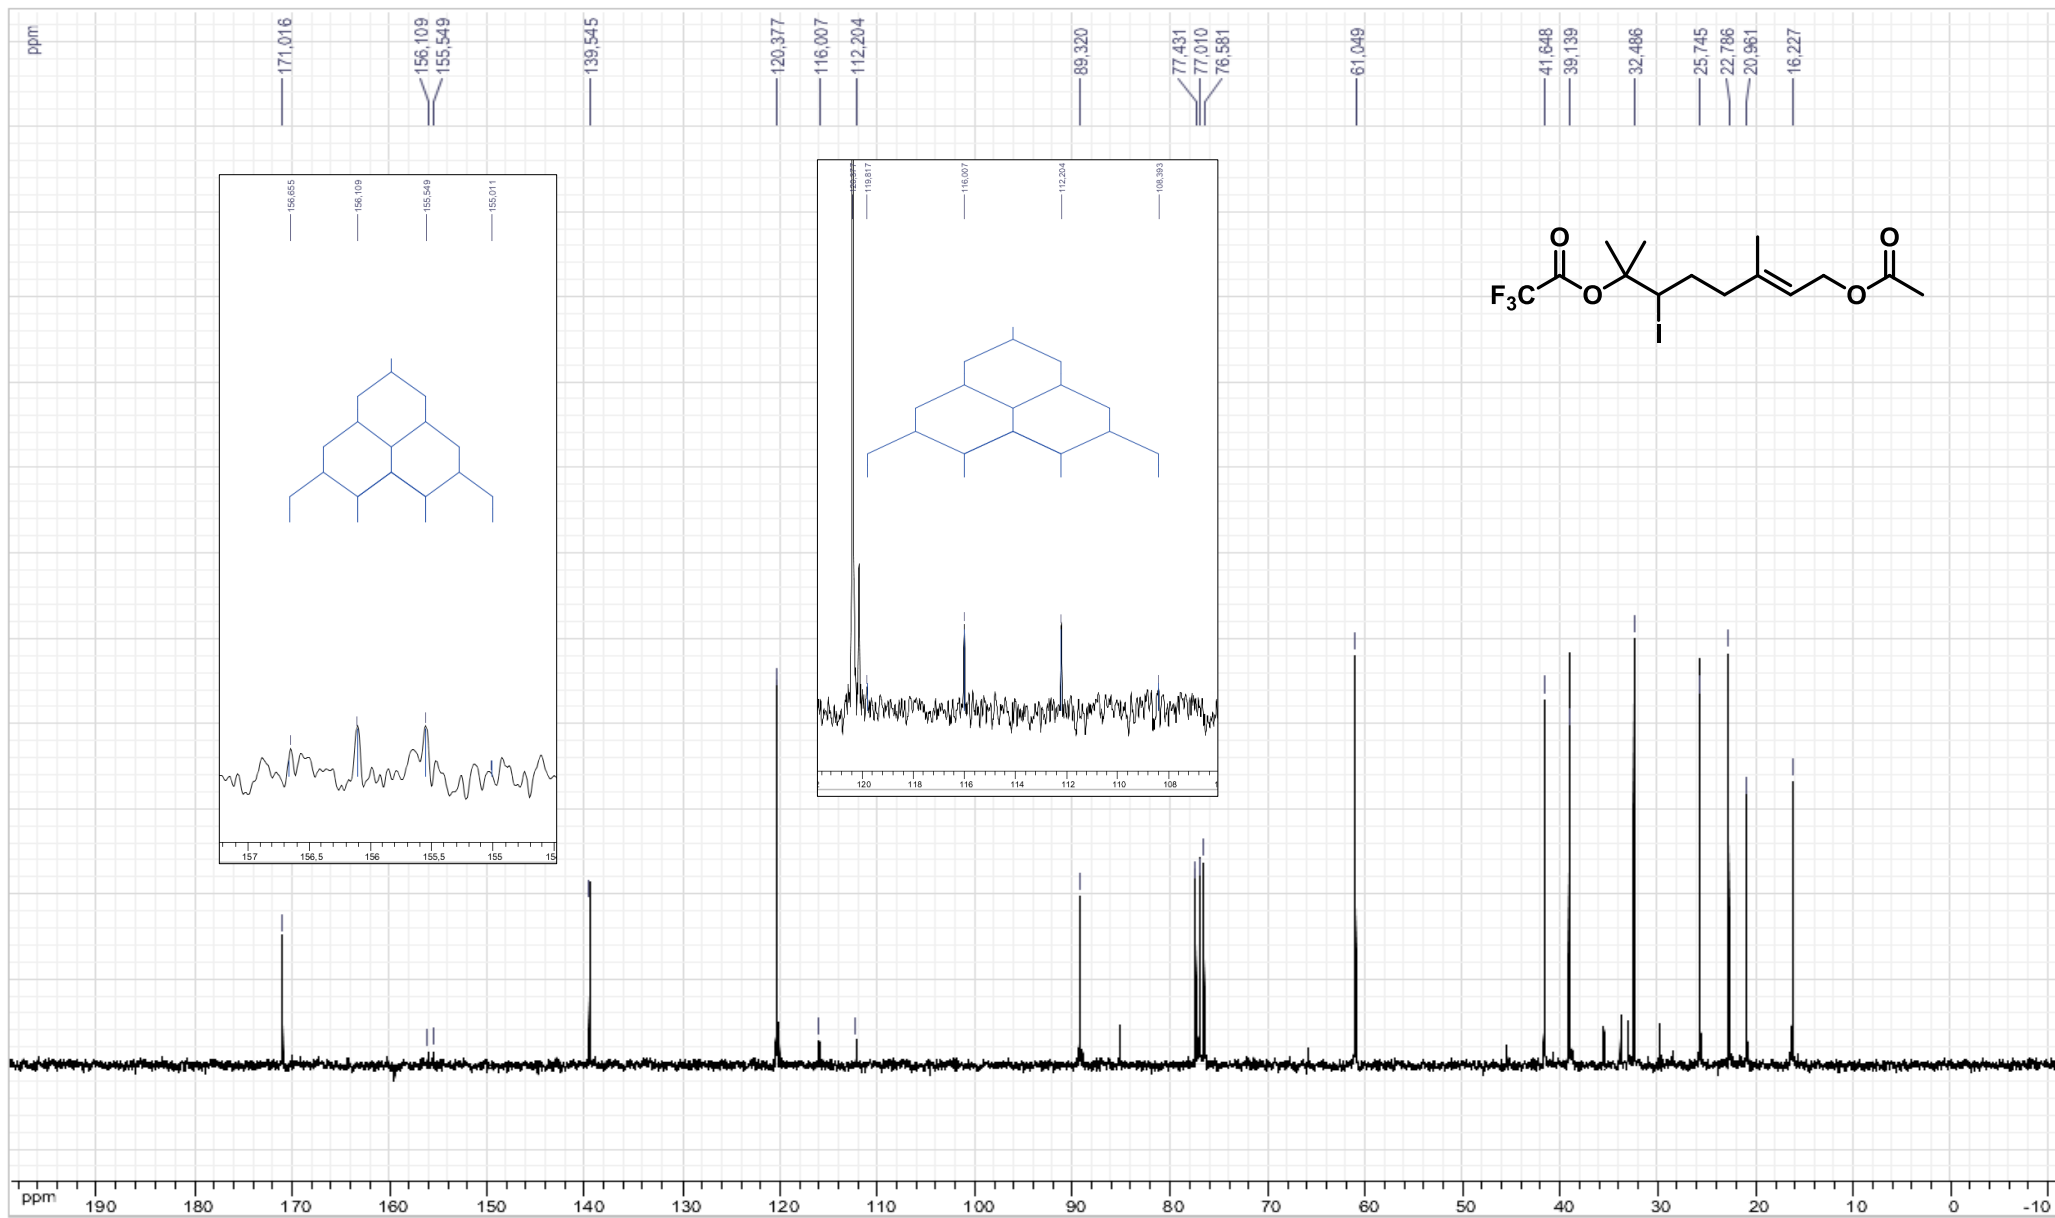

**(Z)-8-Acetoxy-3-iodo-2,6-dimethyloct-6-en-2-yl 2,2,2-trifluoroacetate (5b)**

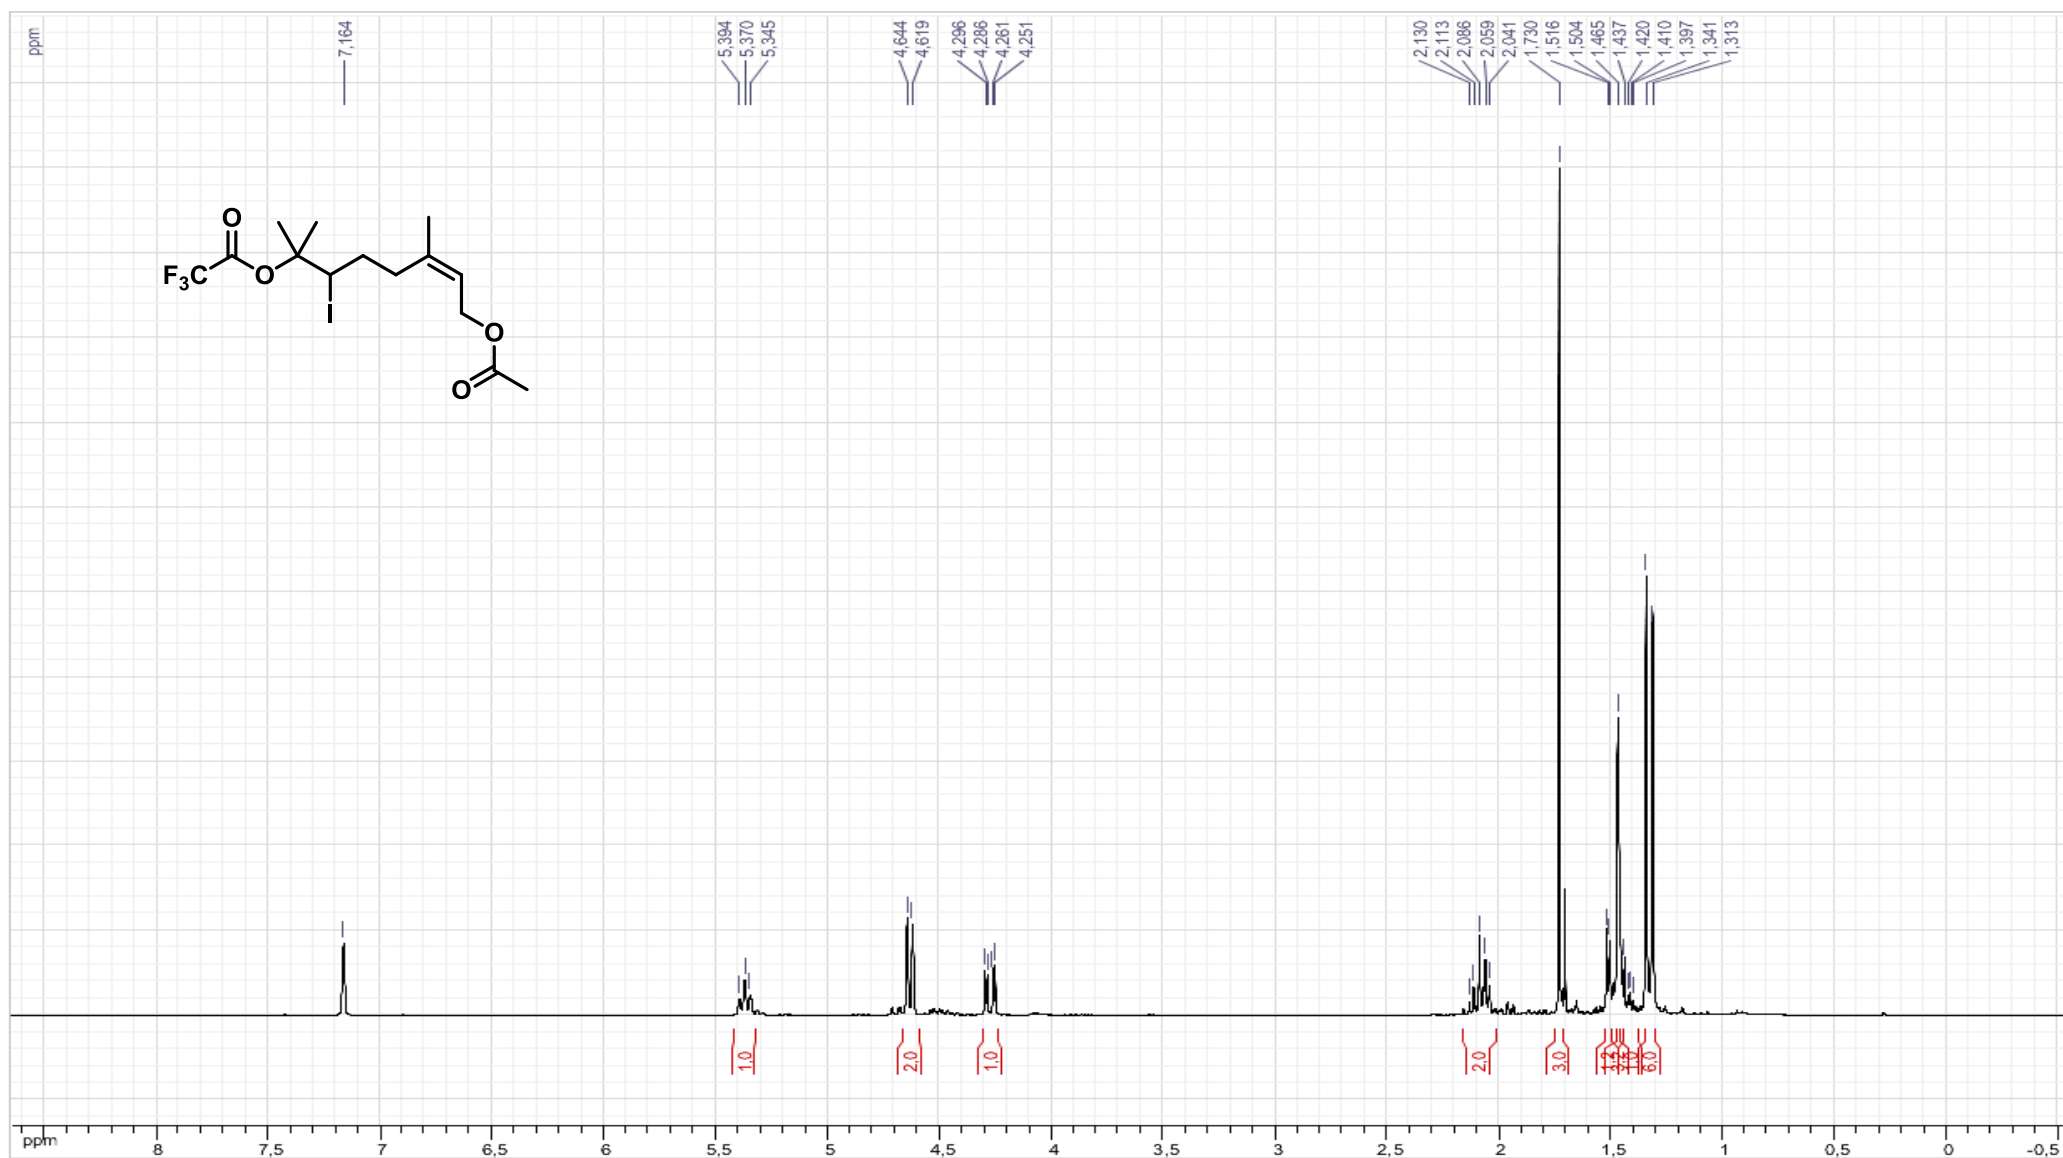

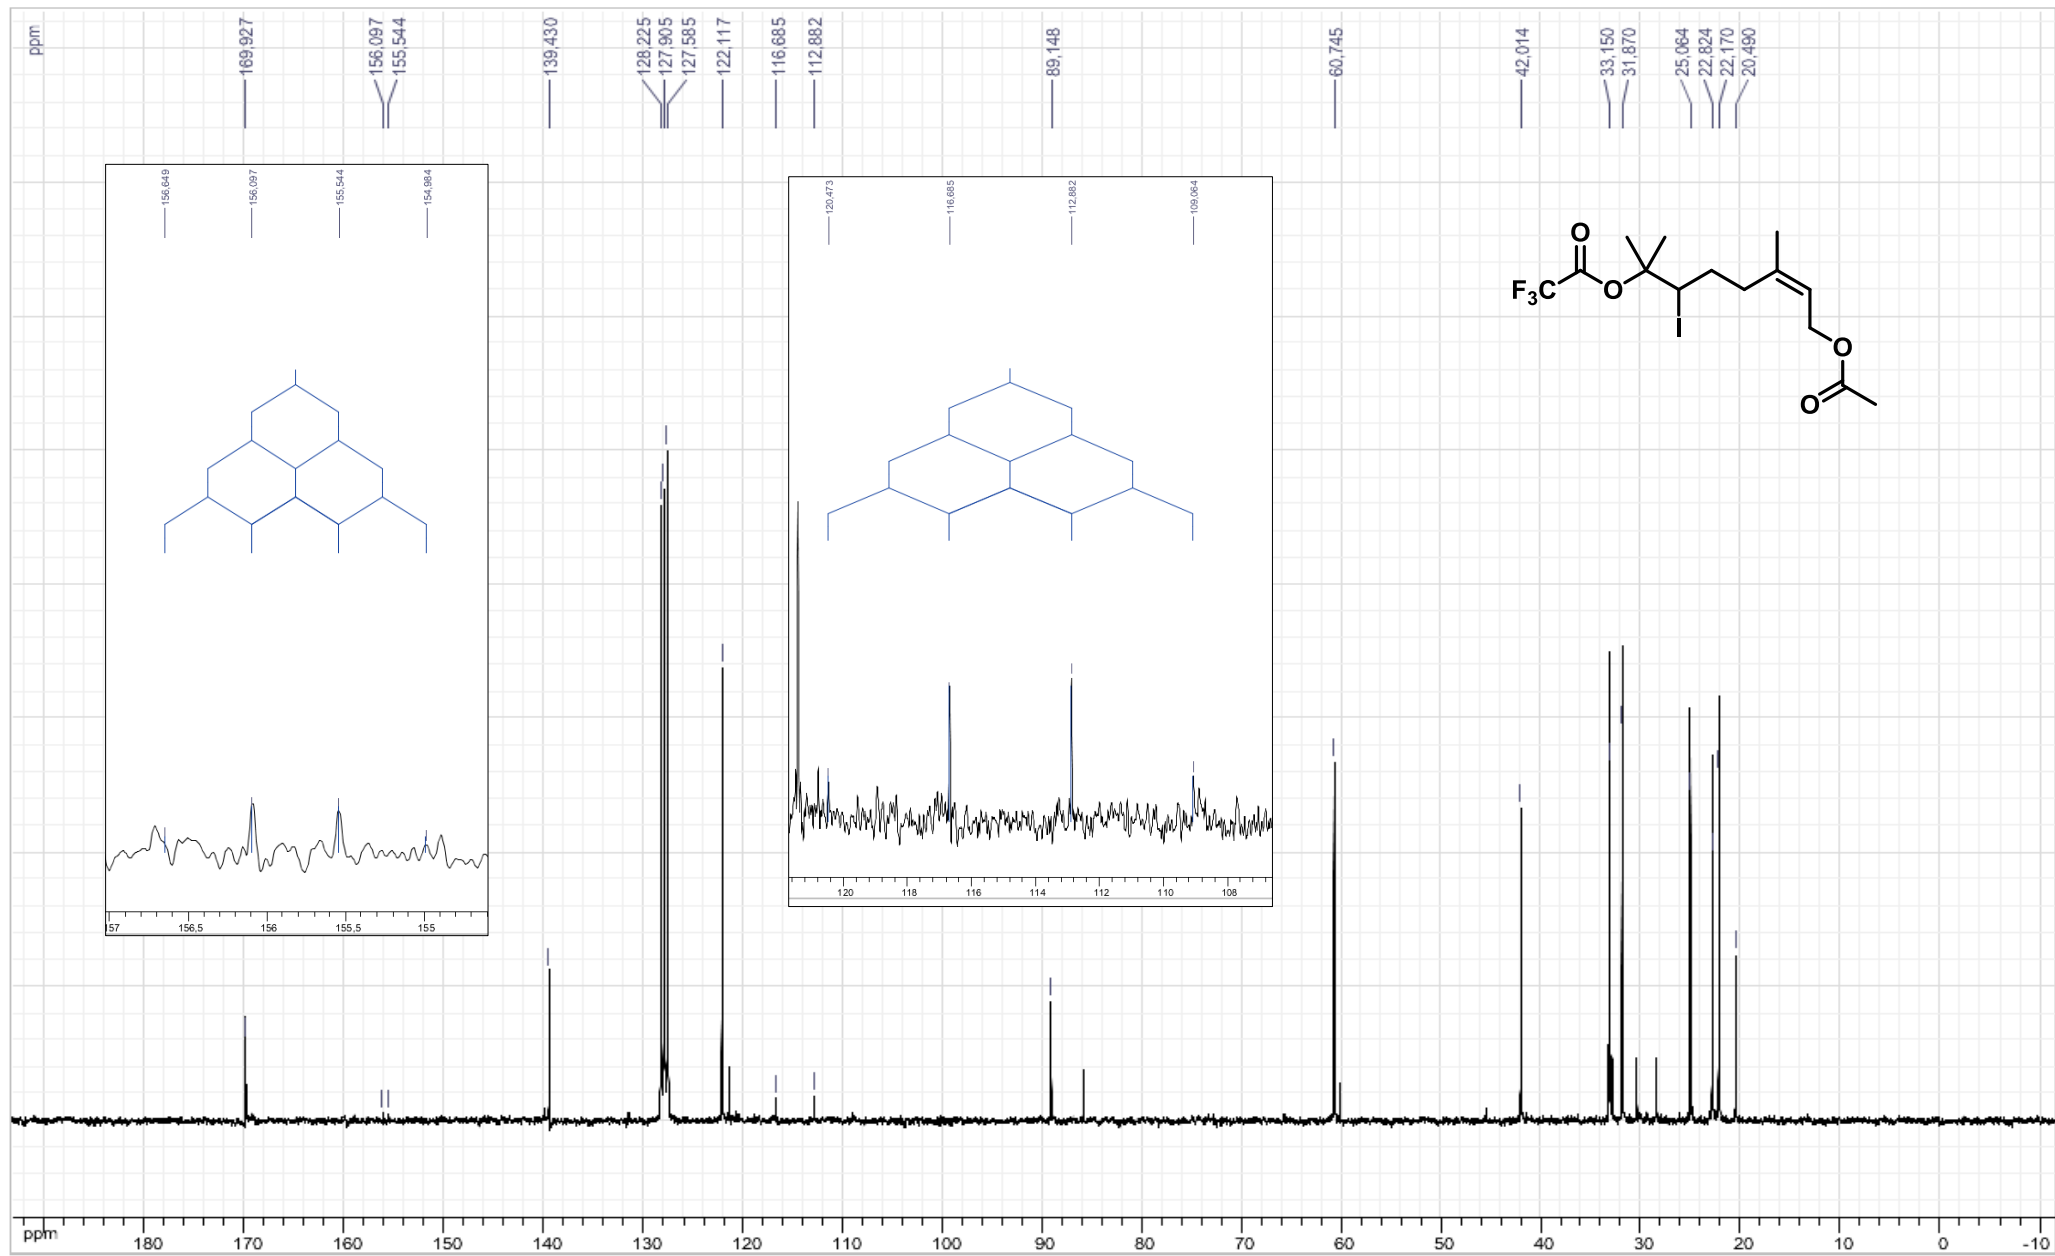

**(E)-8-Hydroxy-3-iodo-2,6-dimethyloct-6-en-2-yl 2,2,2-trifluoroacetate (5c)**

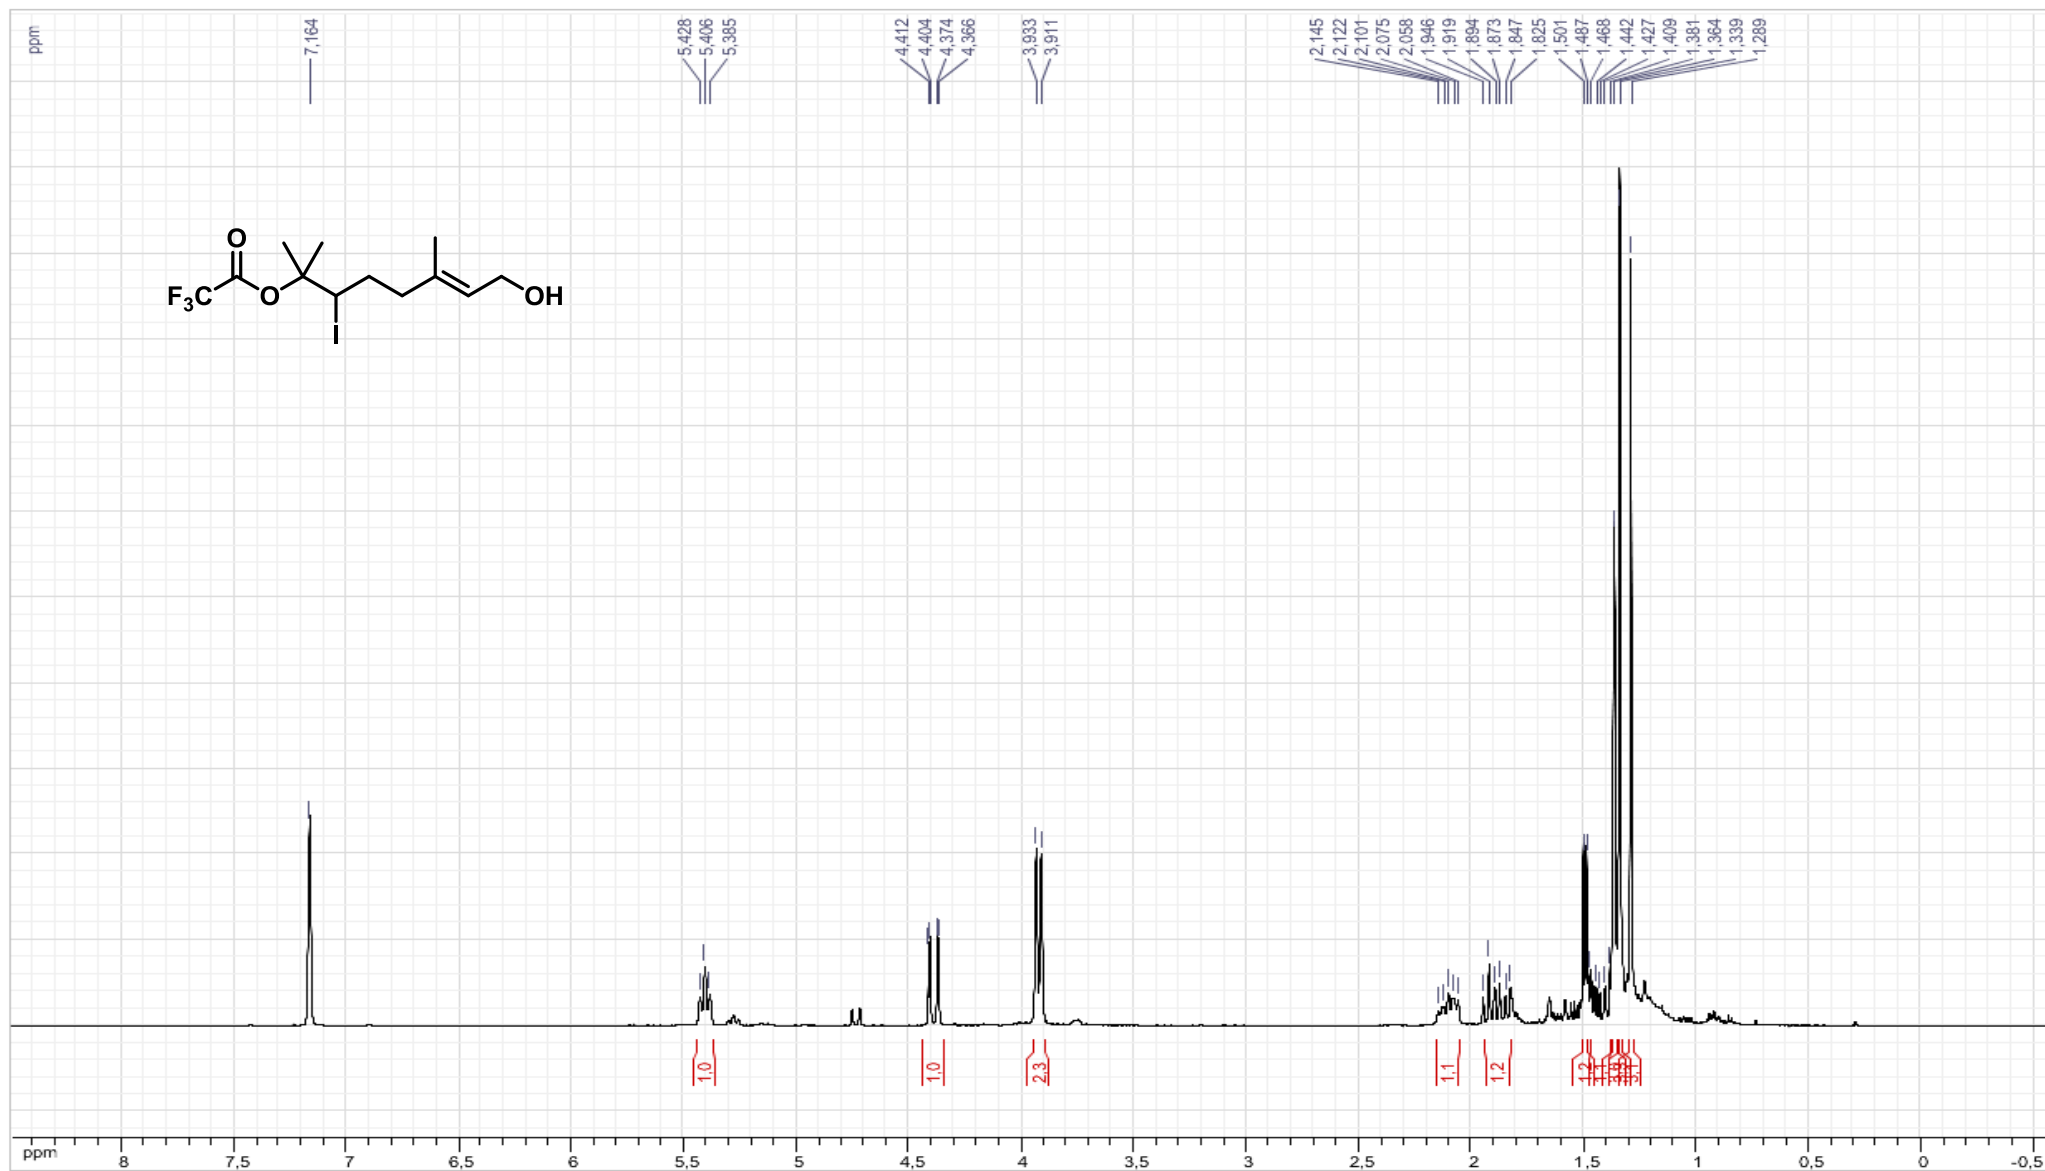

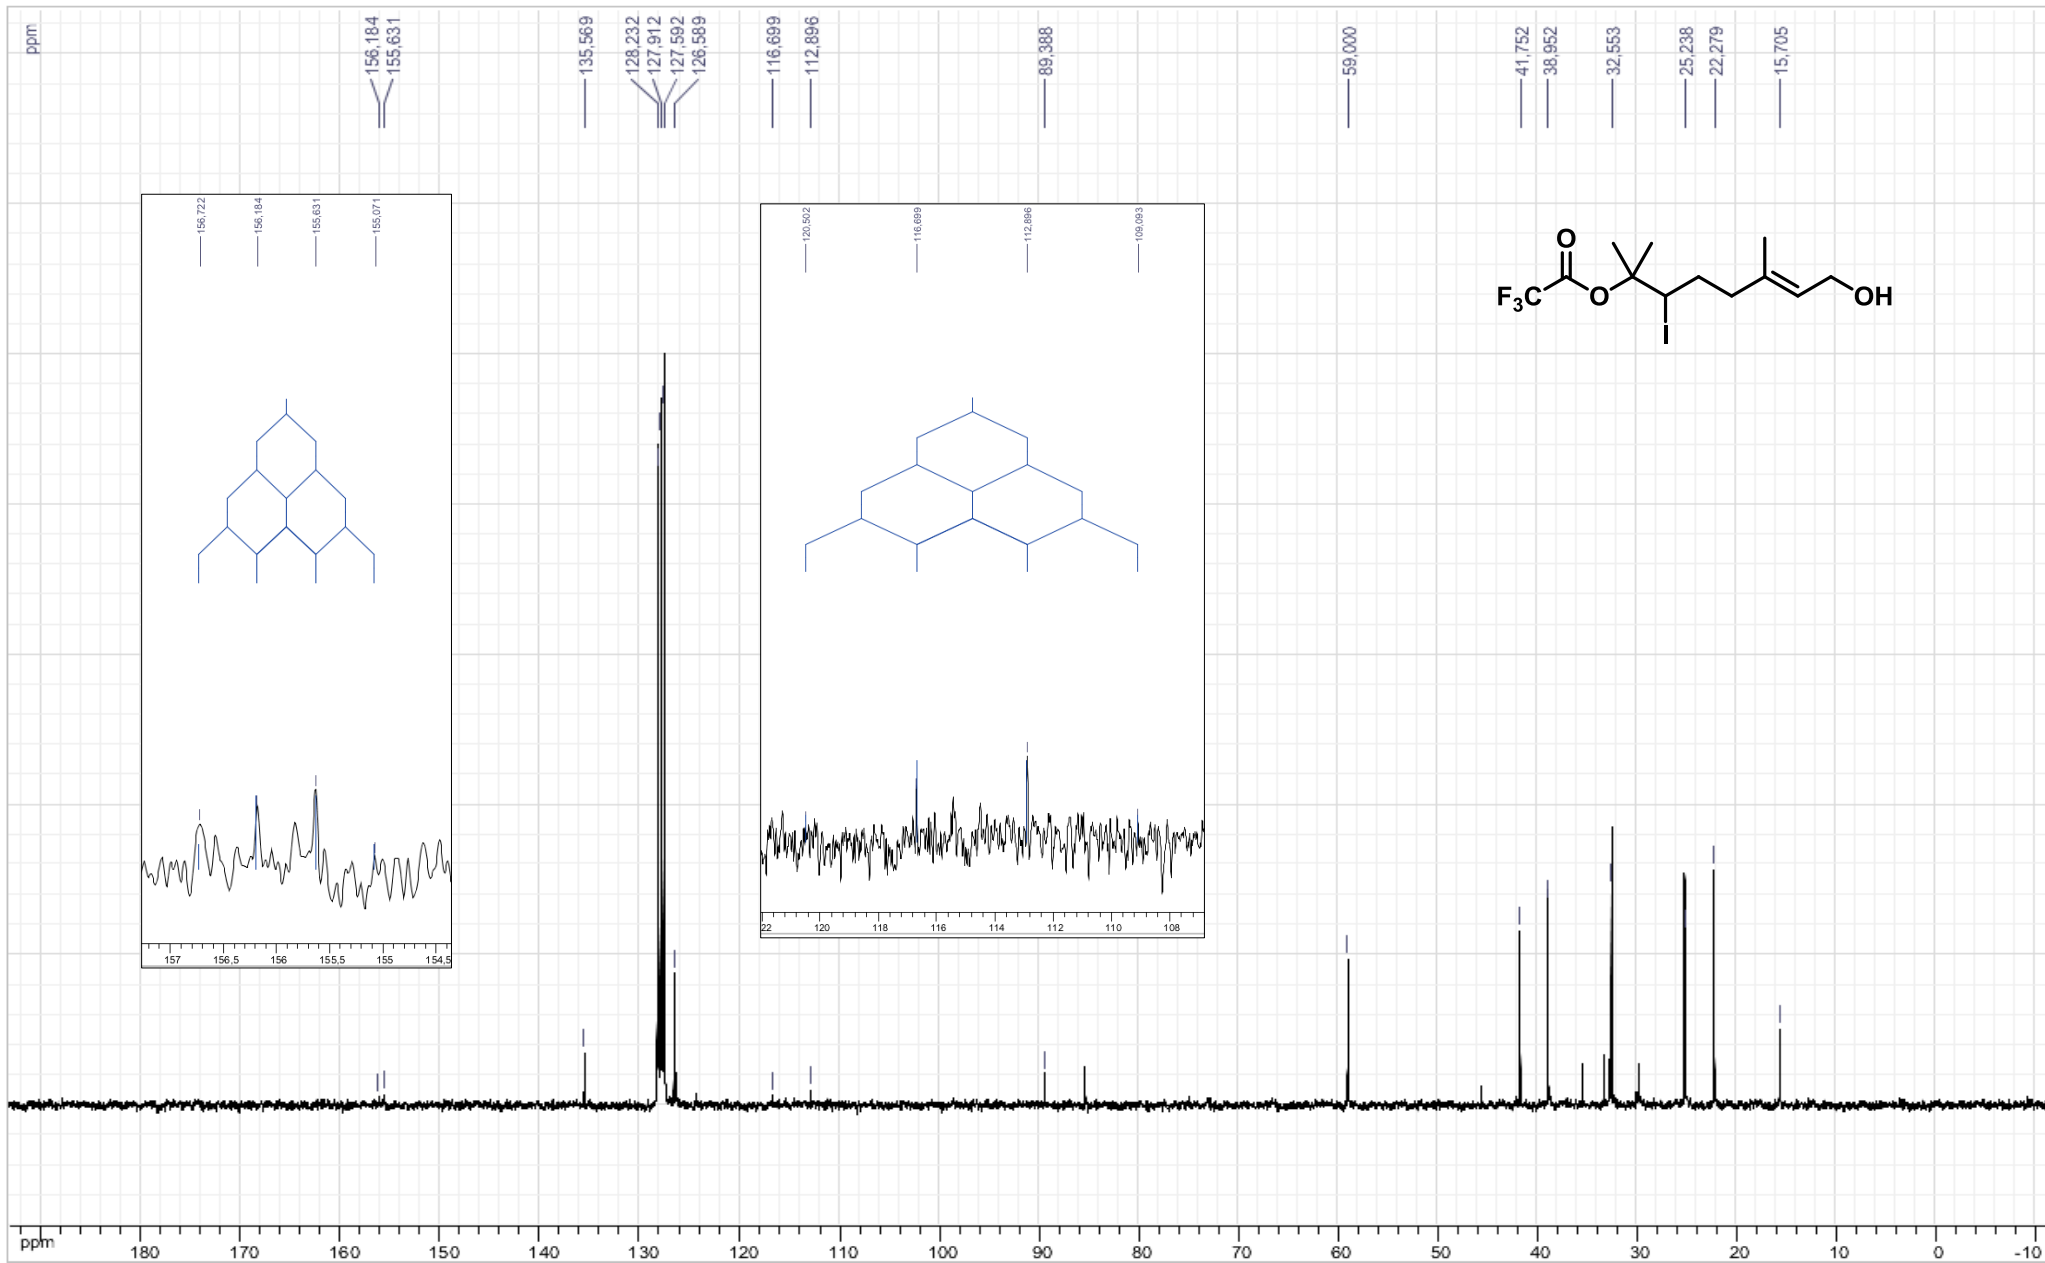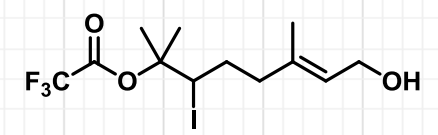

**(E)-3-Iodo-2,6-dimethyl-8-((4-methylphenyl)sulfonamido)oct-6-en-2-yl 2,2,2-trifluoroacetate (5d)**

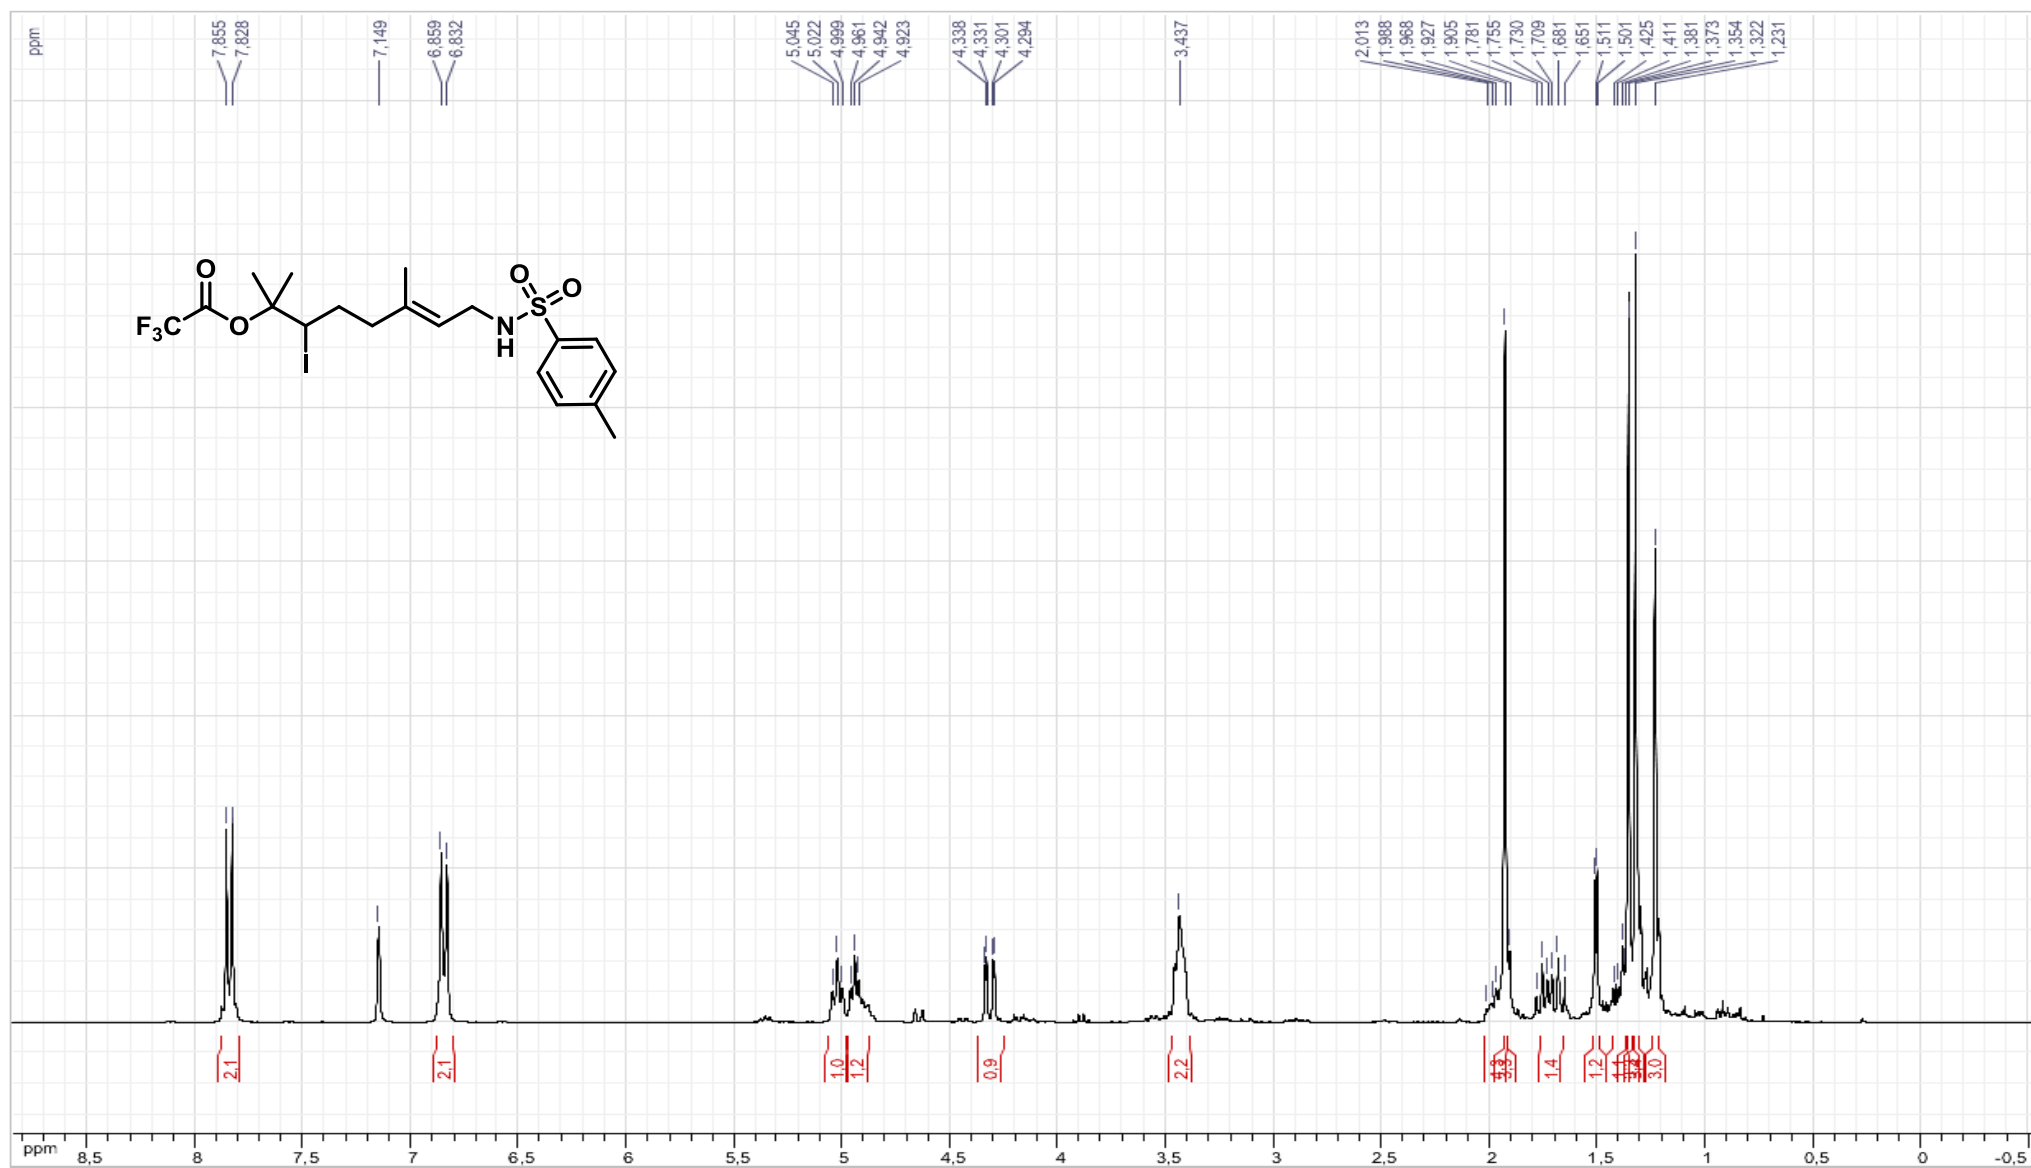



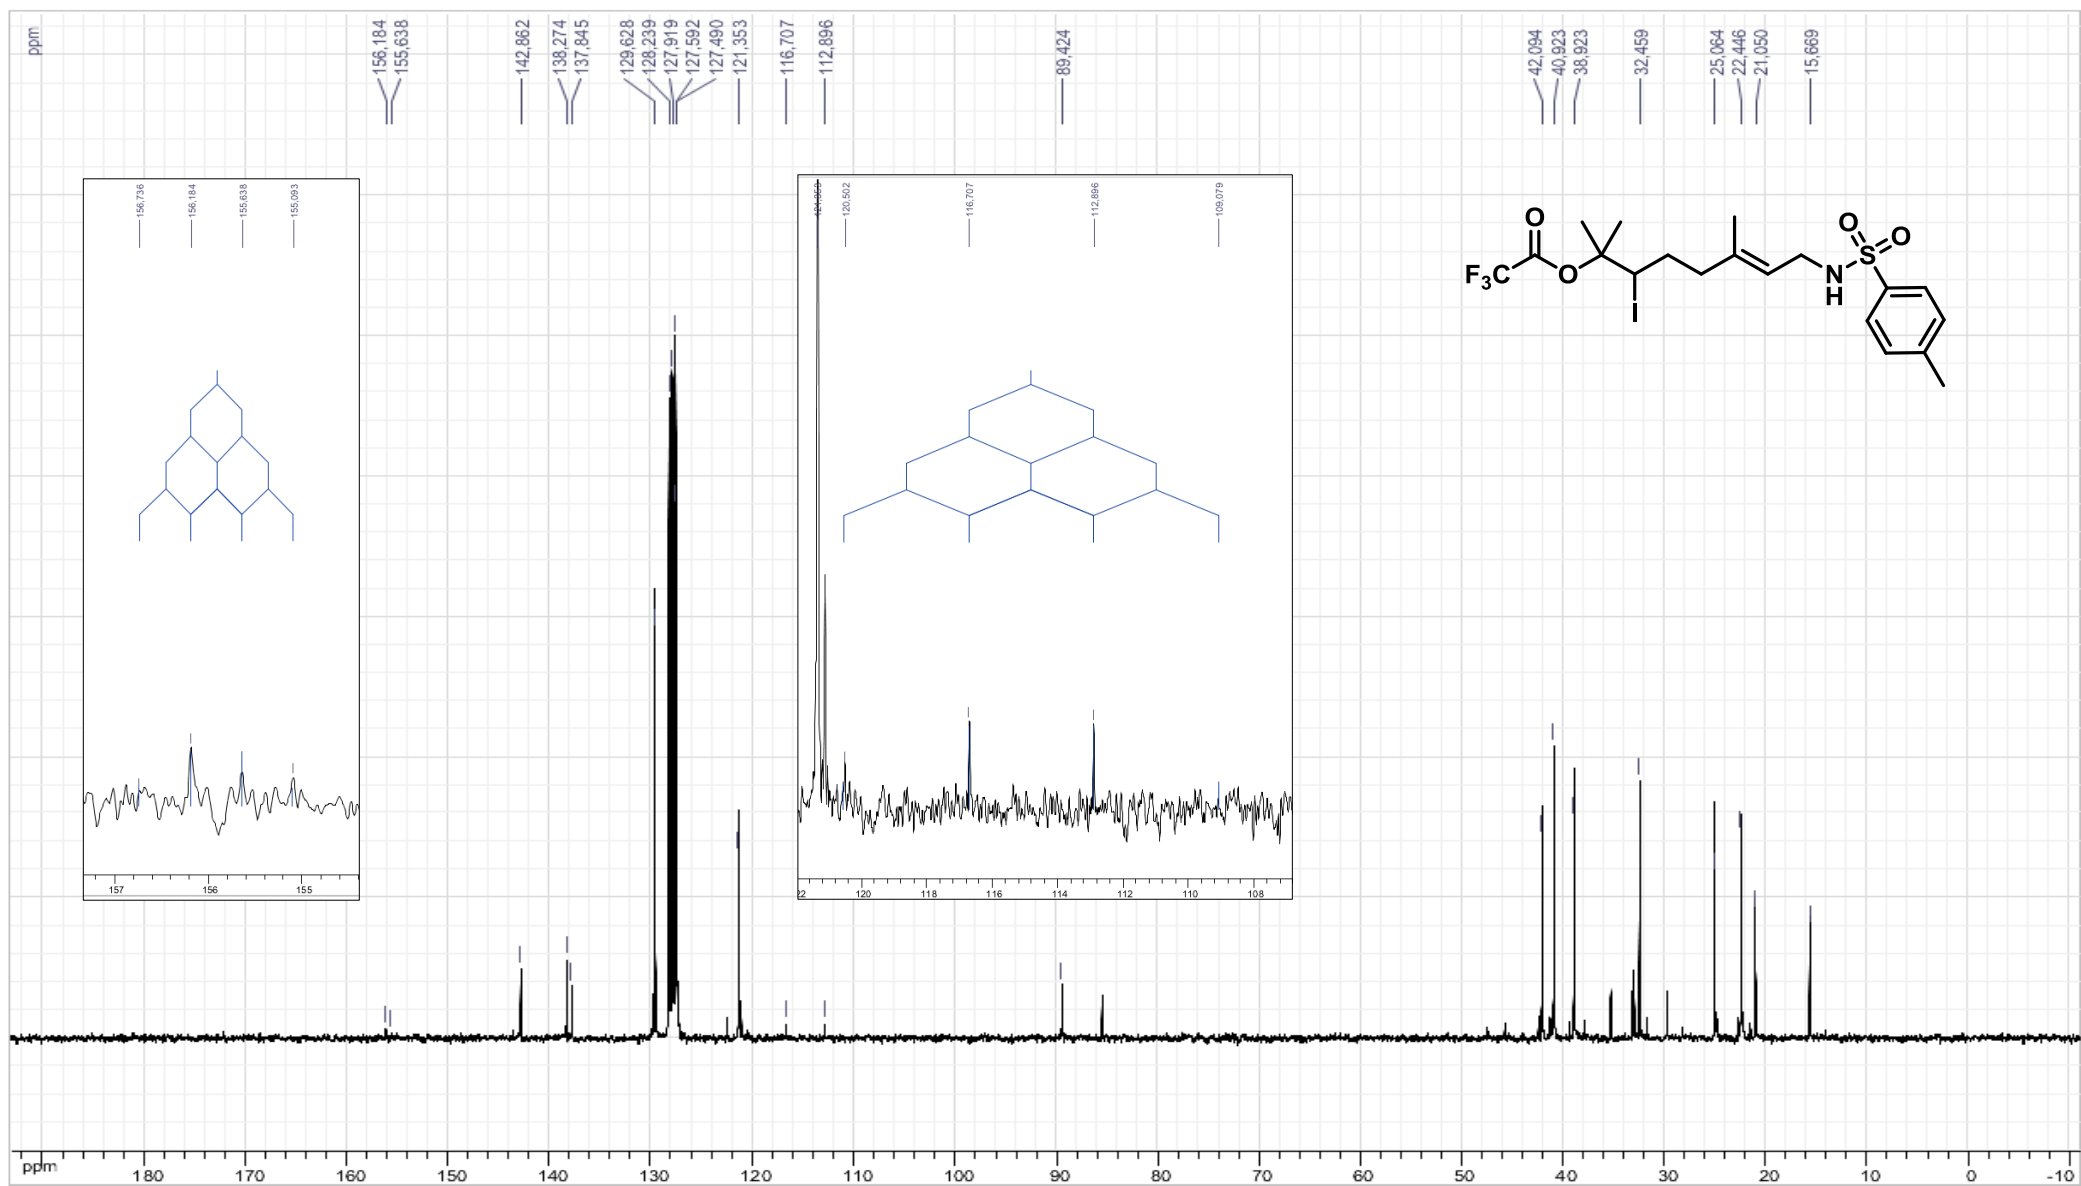

**3-Iodo-2-methyl-6-methyleneoct-7-en-2-yl 2,2,2-trifluoroacetate (5e)**

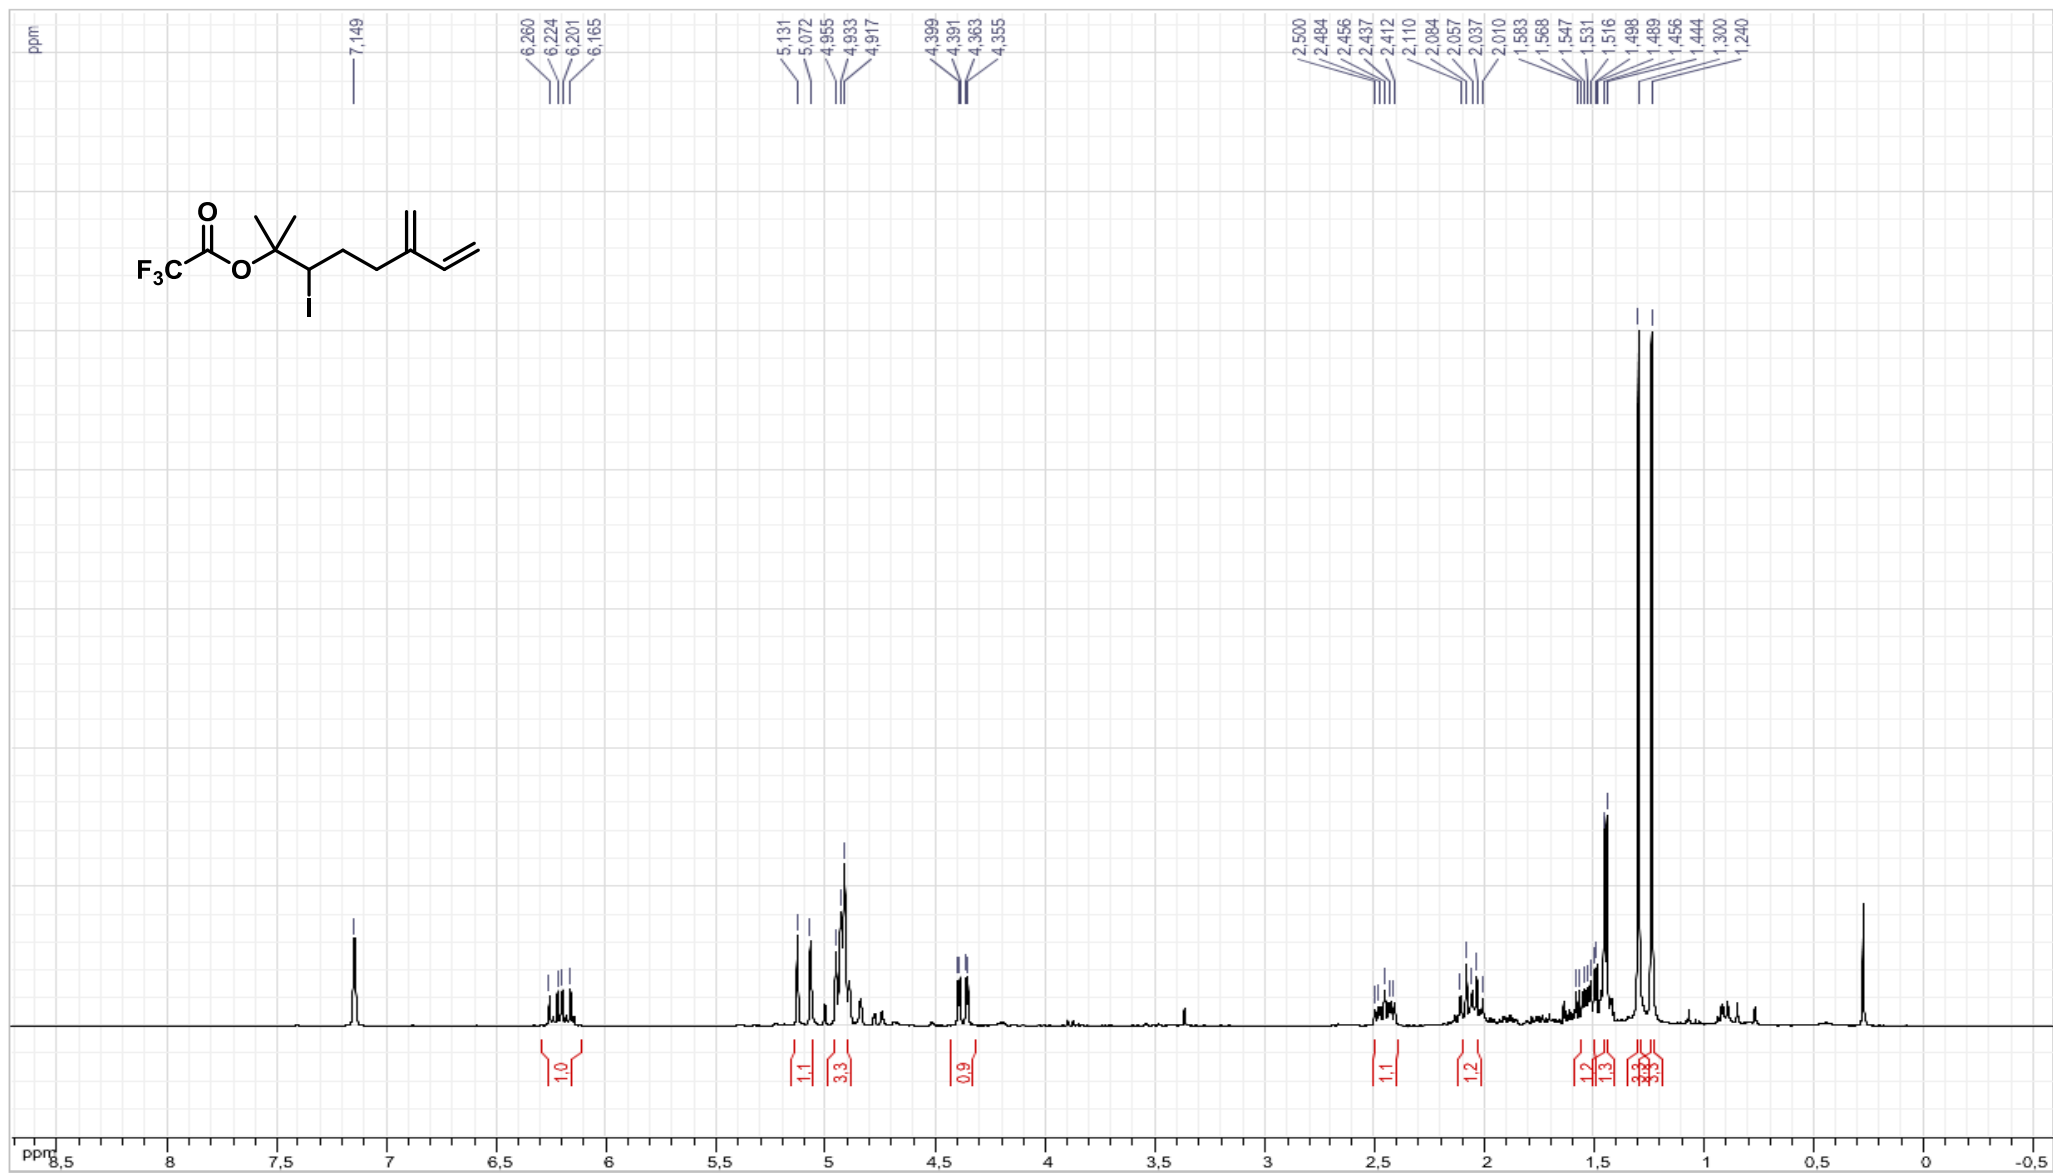

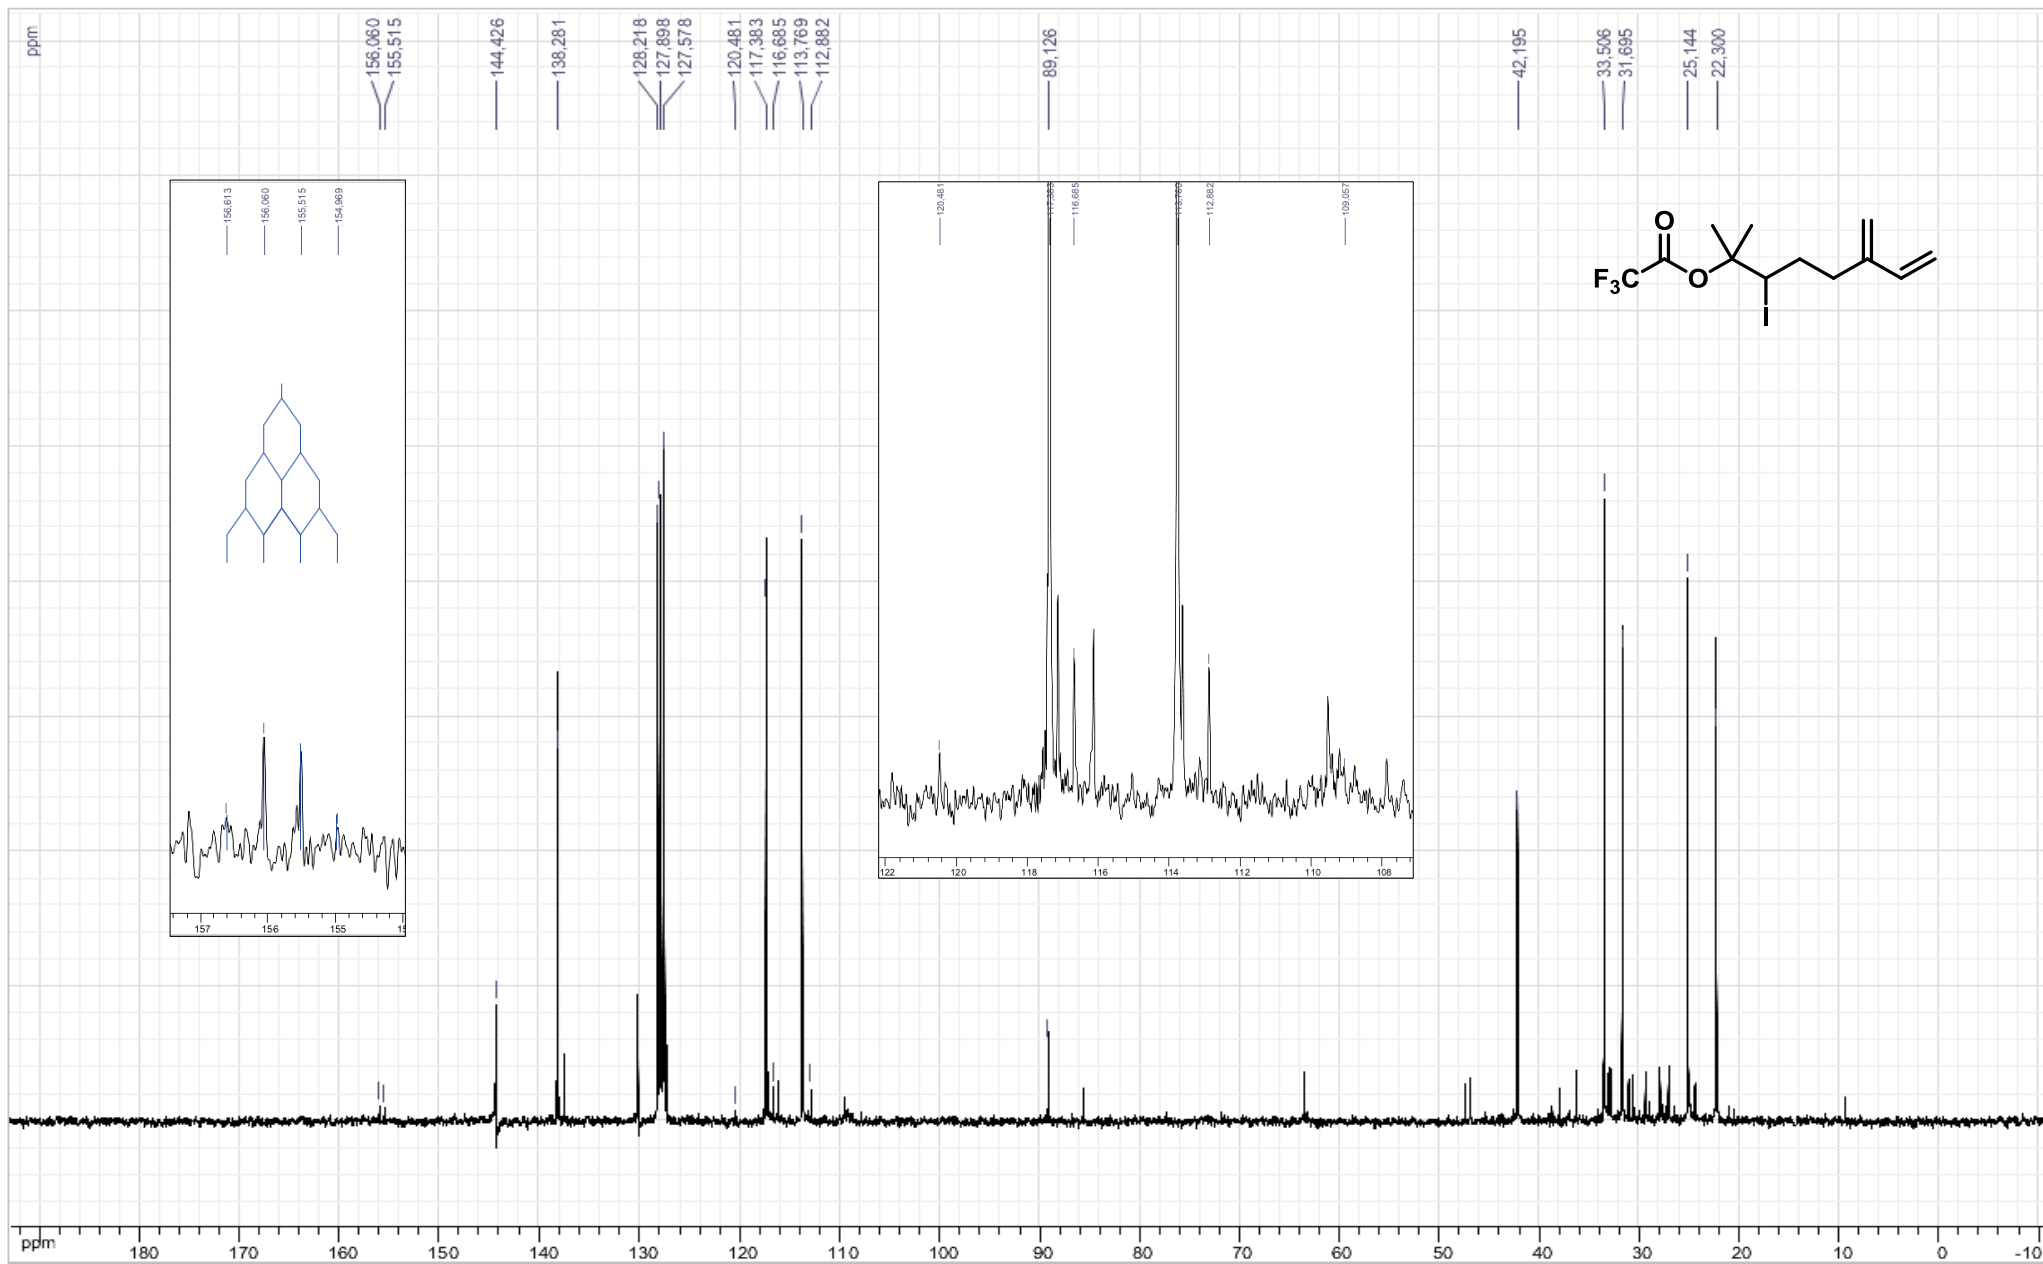

**(E)-6-Chloro-3,7-dimethylocta-2,7-dien-1-yl acetate (6a)**

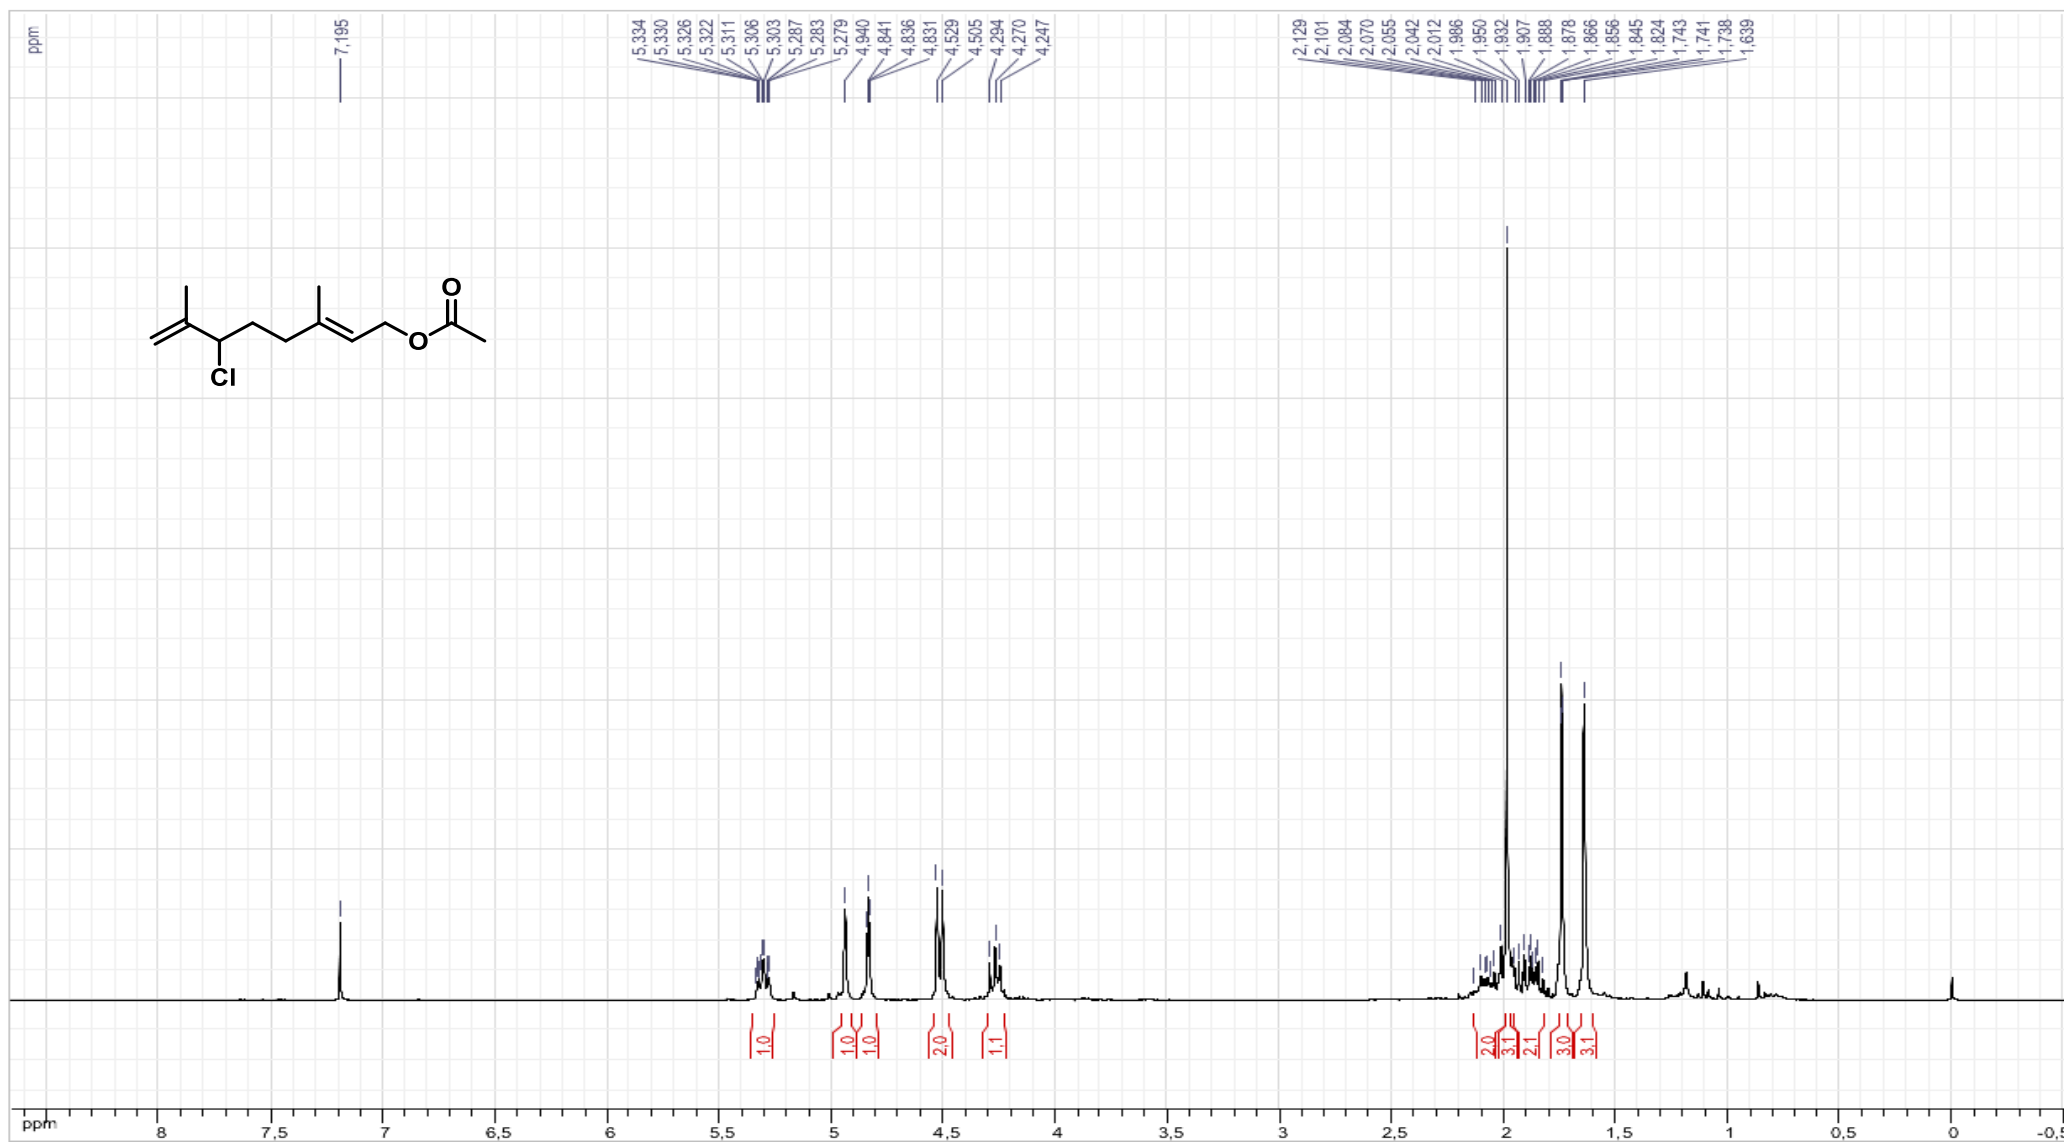

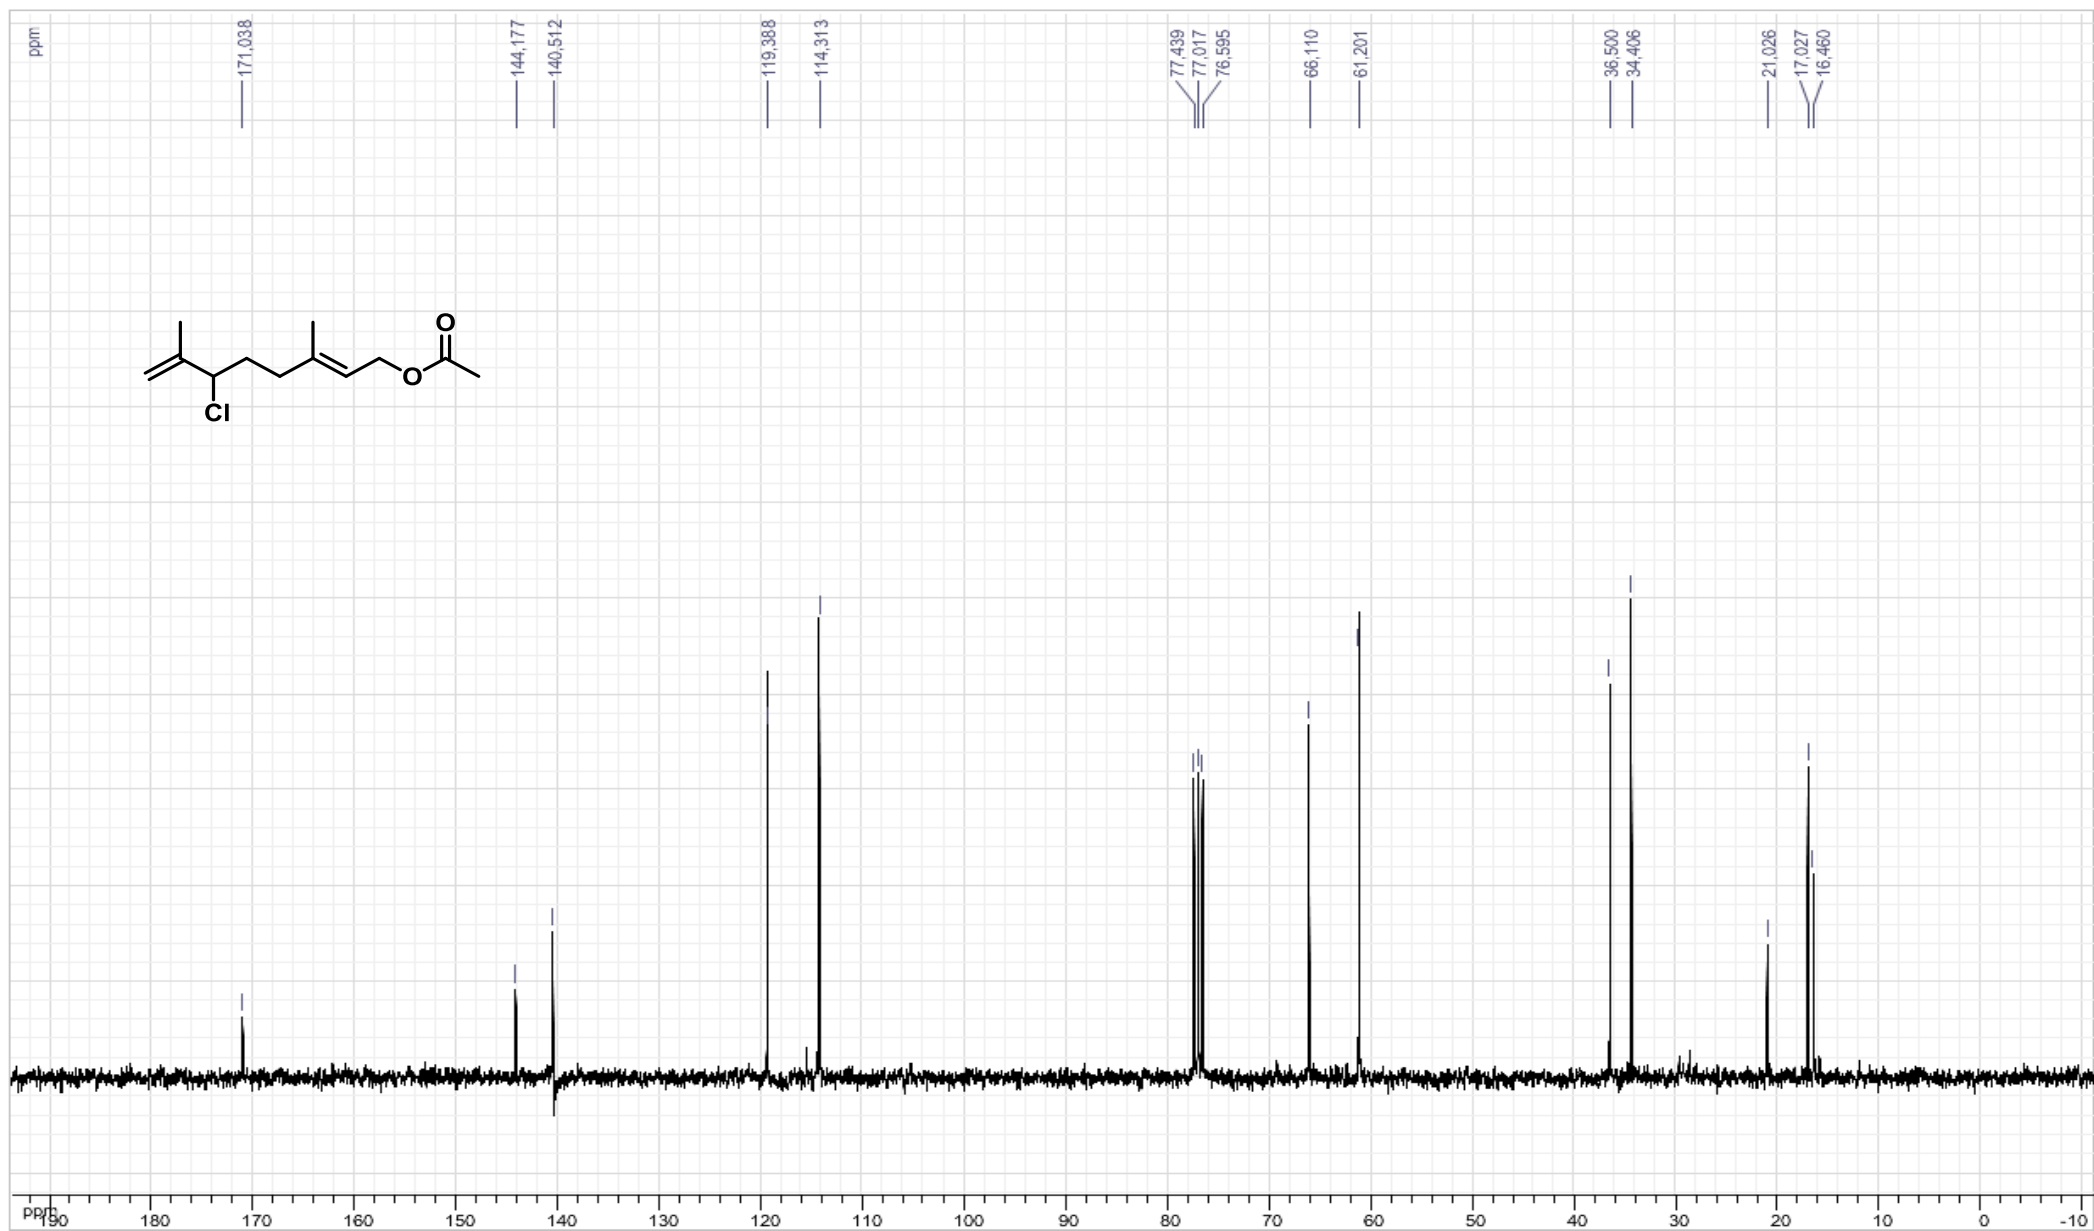

**(Z)-6-Chloro-3,7-dimethylocta-2,7-dien-1-yl acetate (6b)**

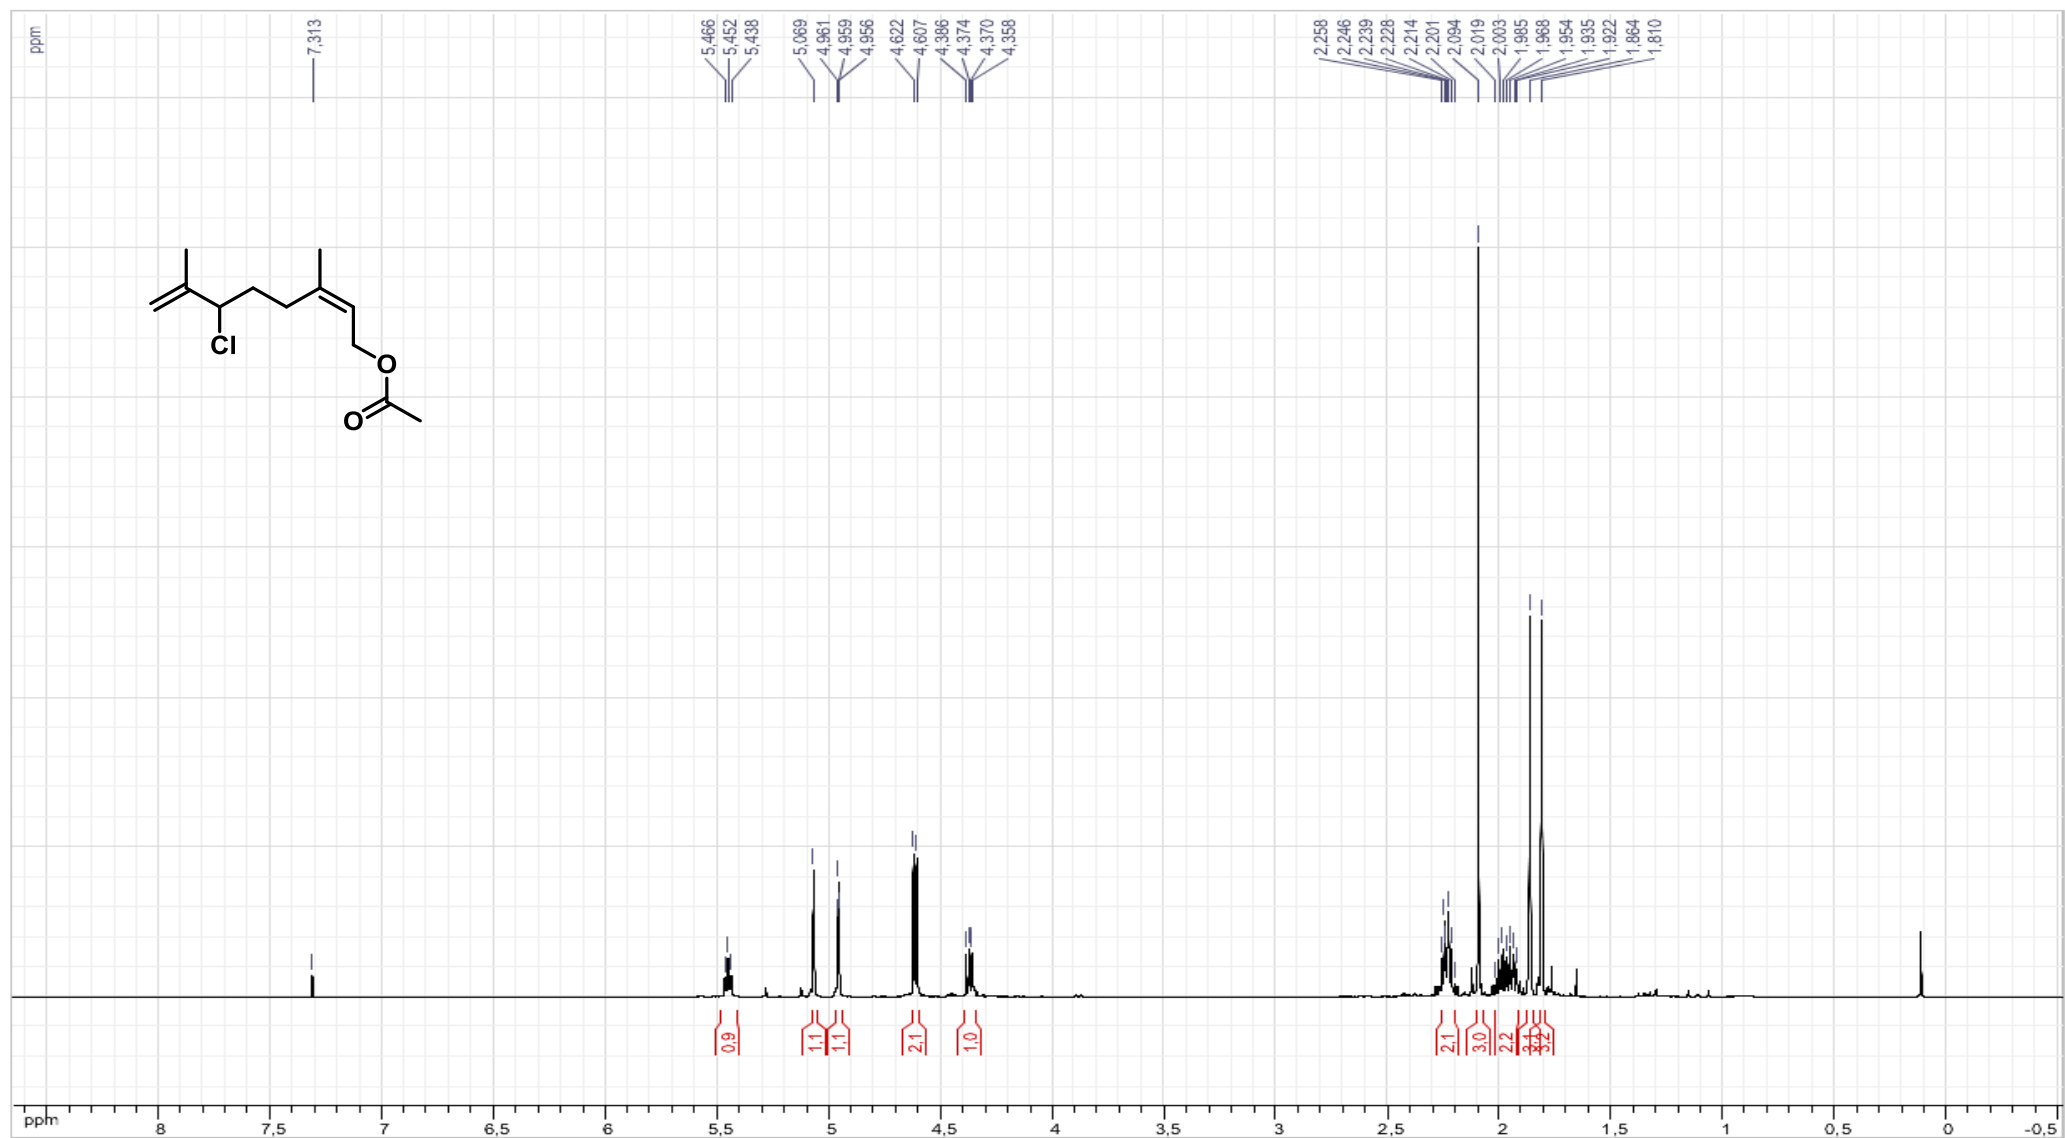

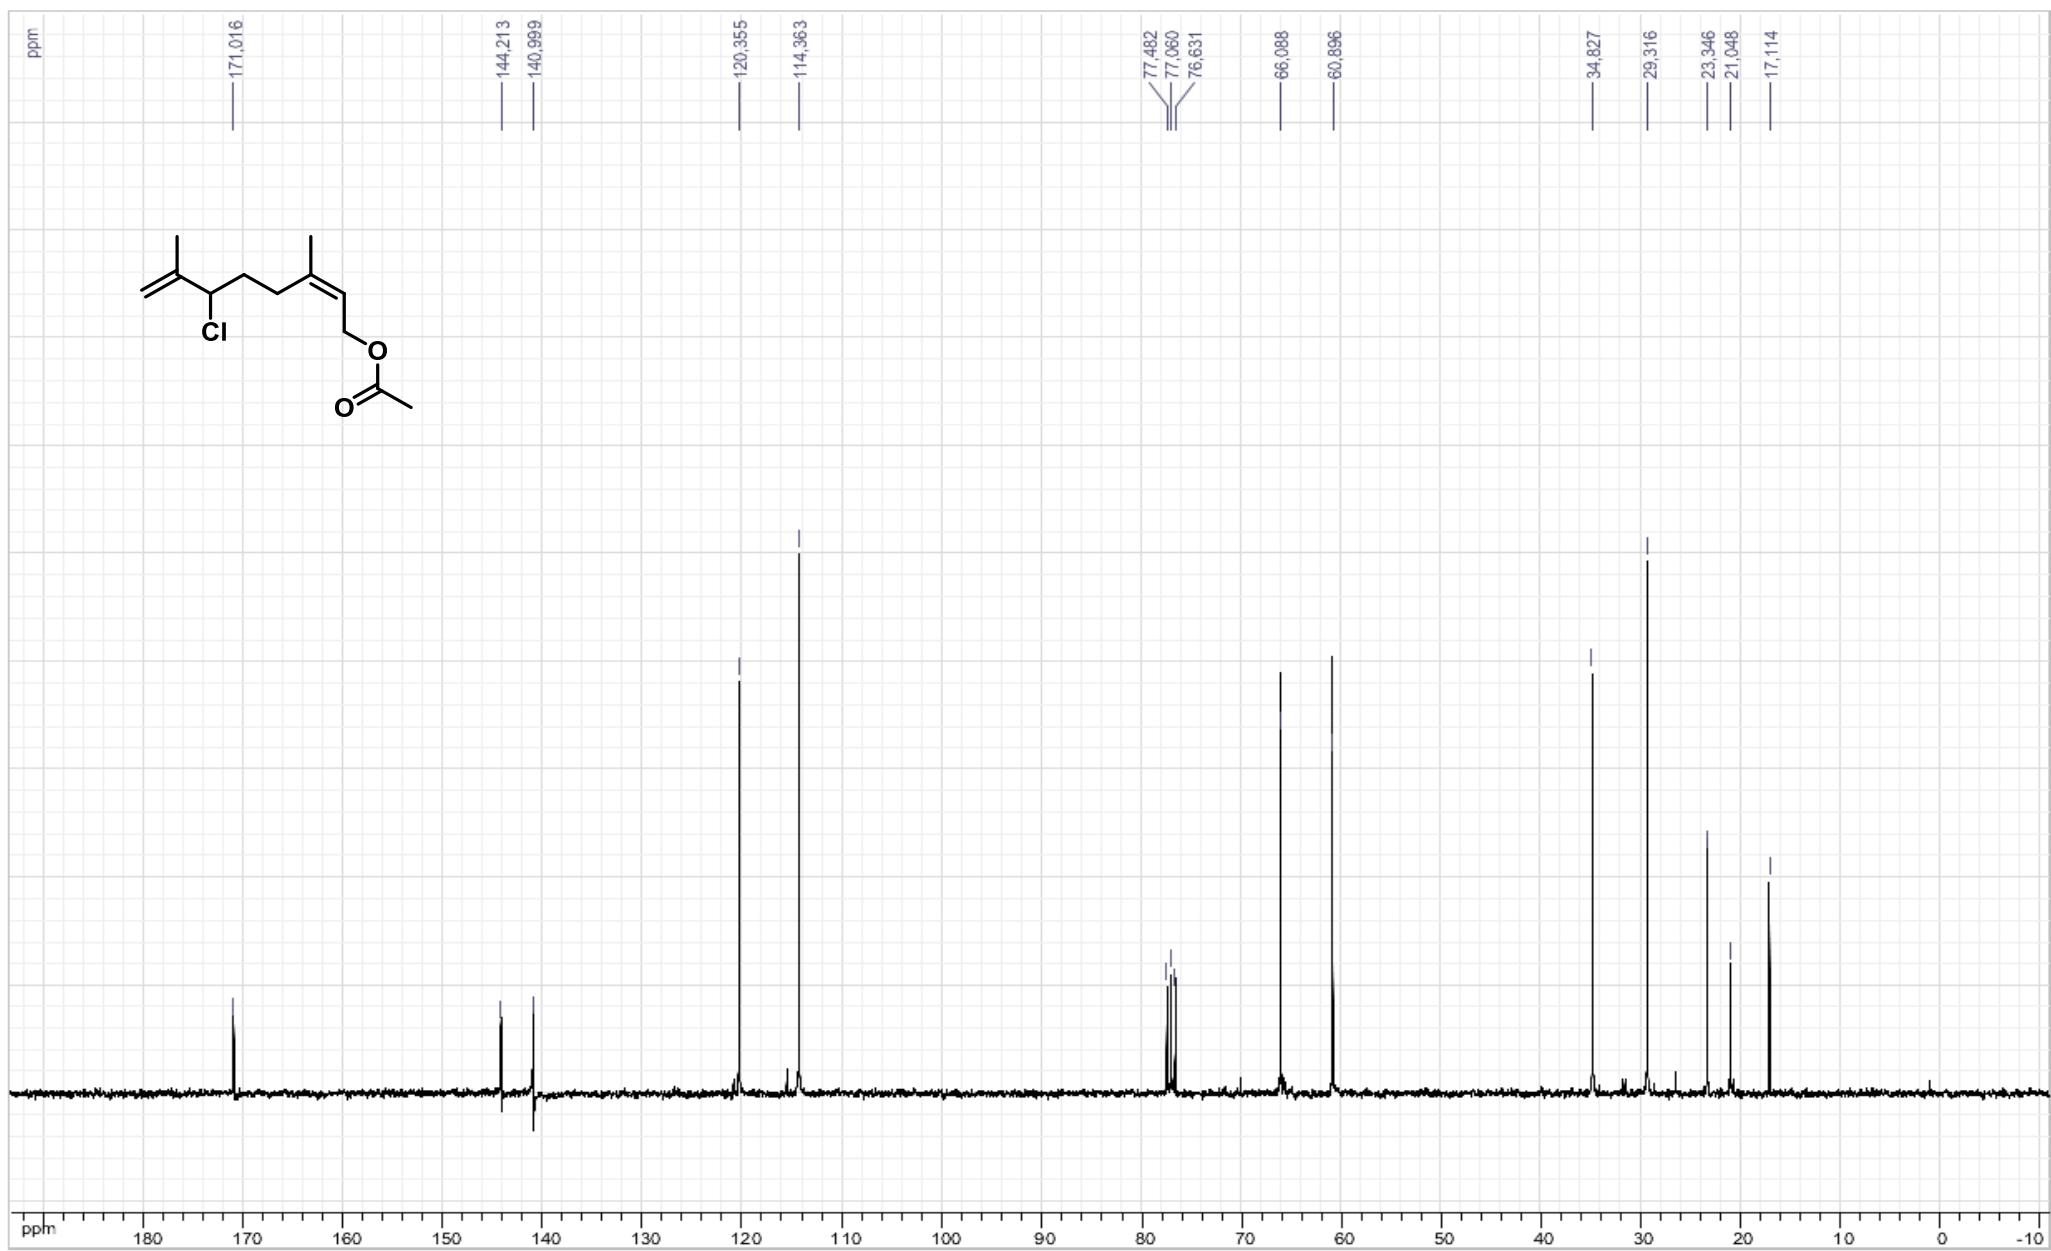

**(E)-6-Chloro-3,7-dimethylocta-2,7-dien-1-ol (6c)**

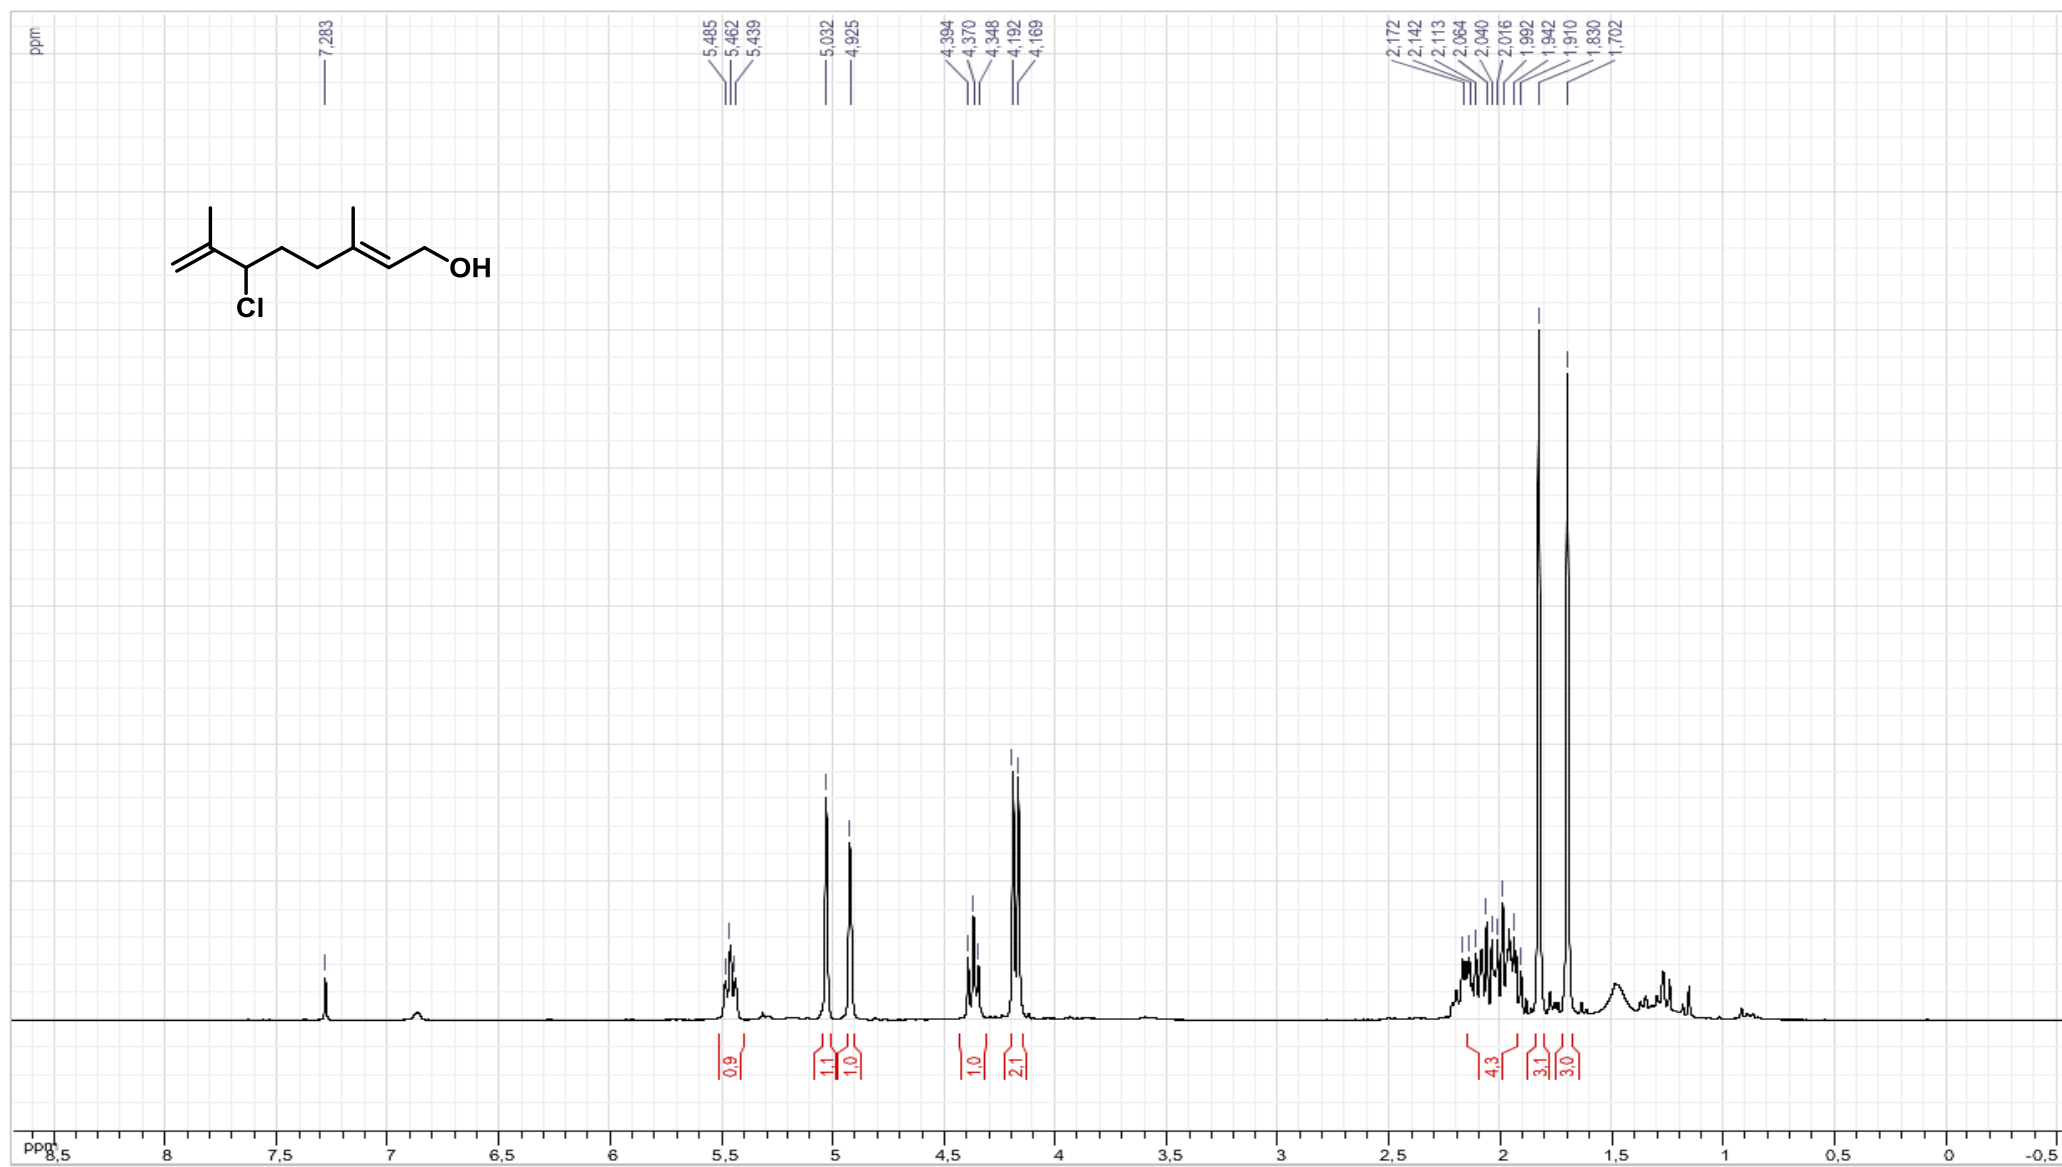



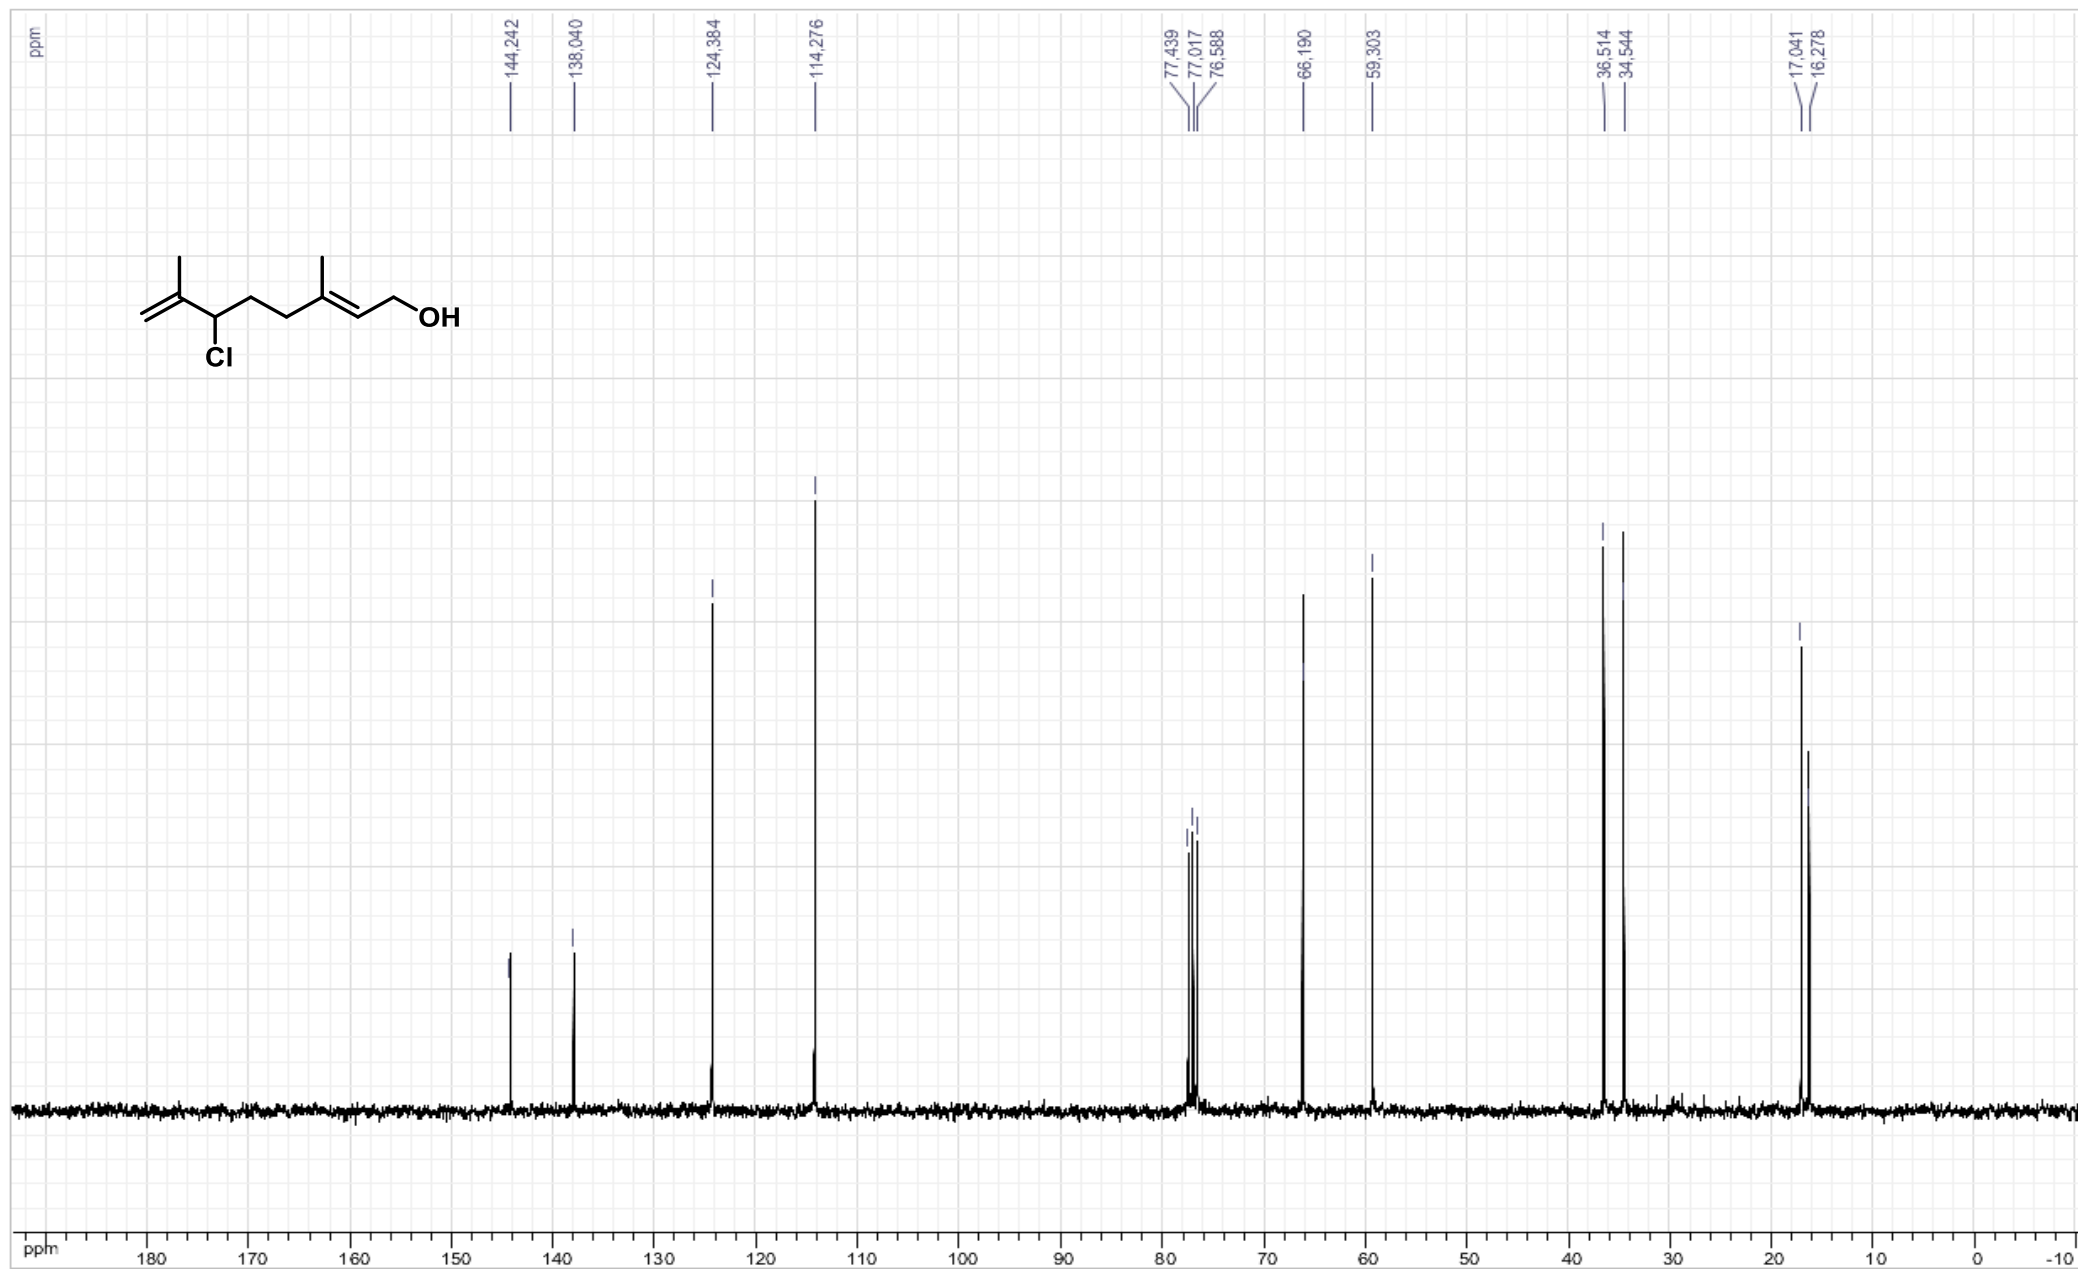

**(E)-N-(6-Chloro-3,7-dimethylocta-2,7-dien-1-yl)-4-methylbenzenesulfonamide (6d)**

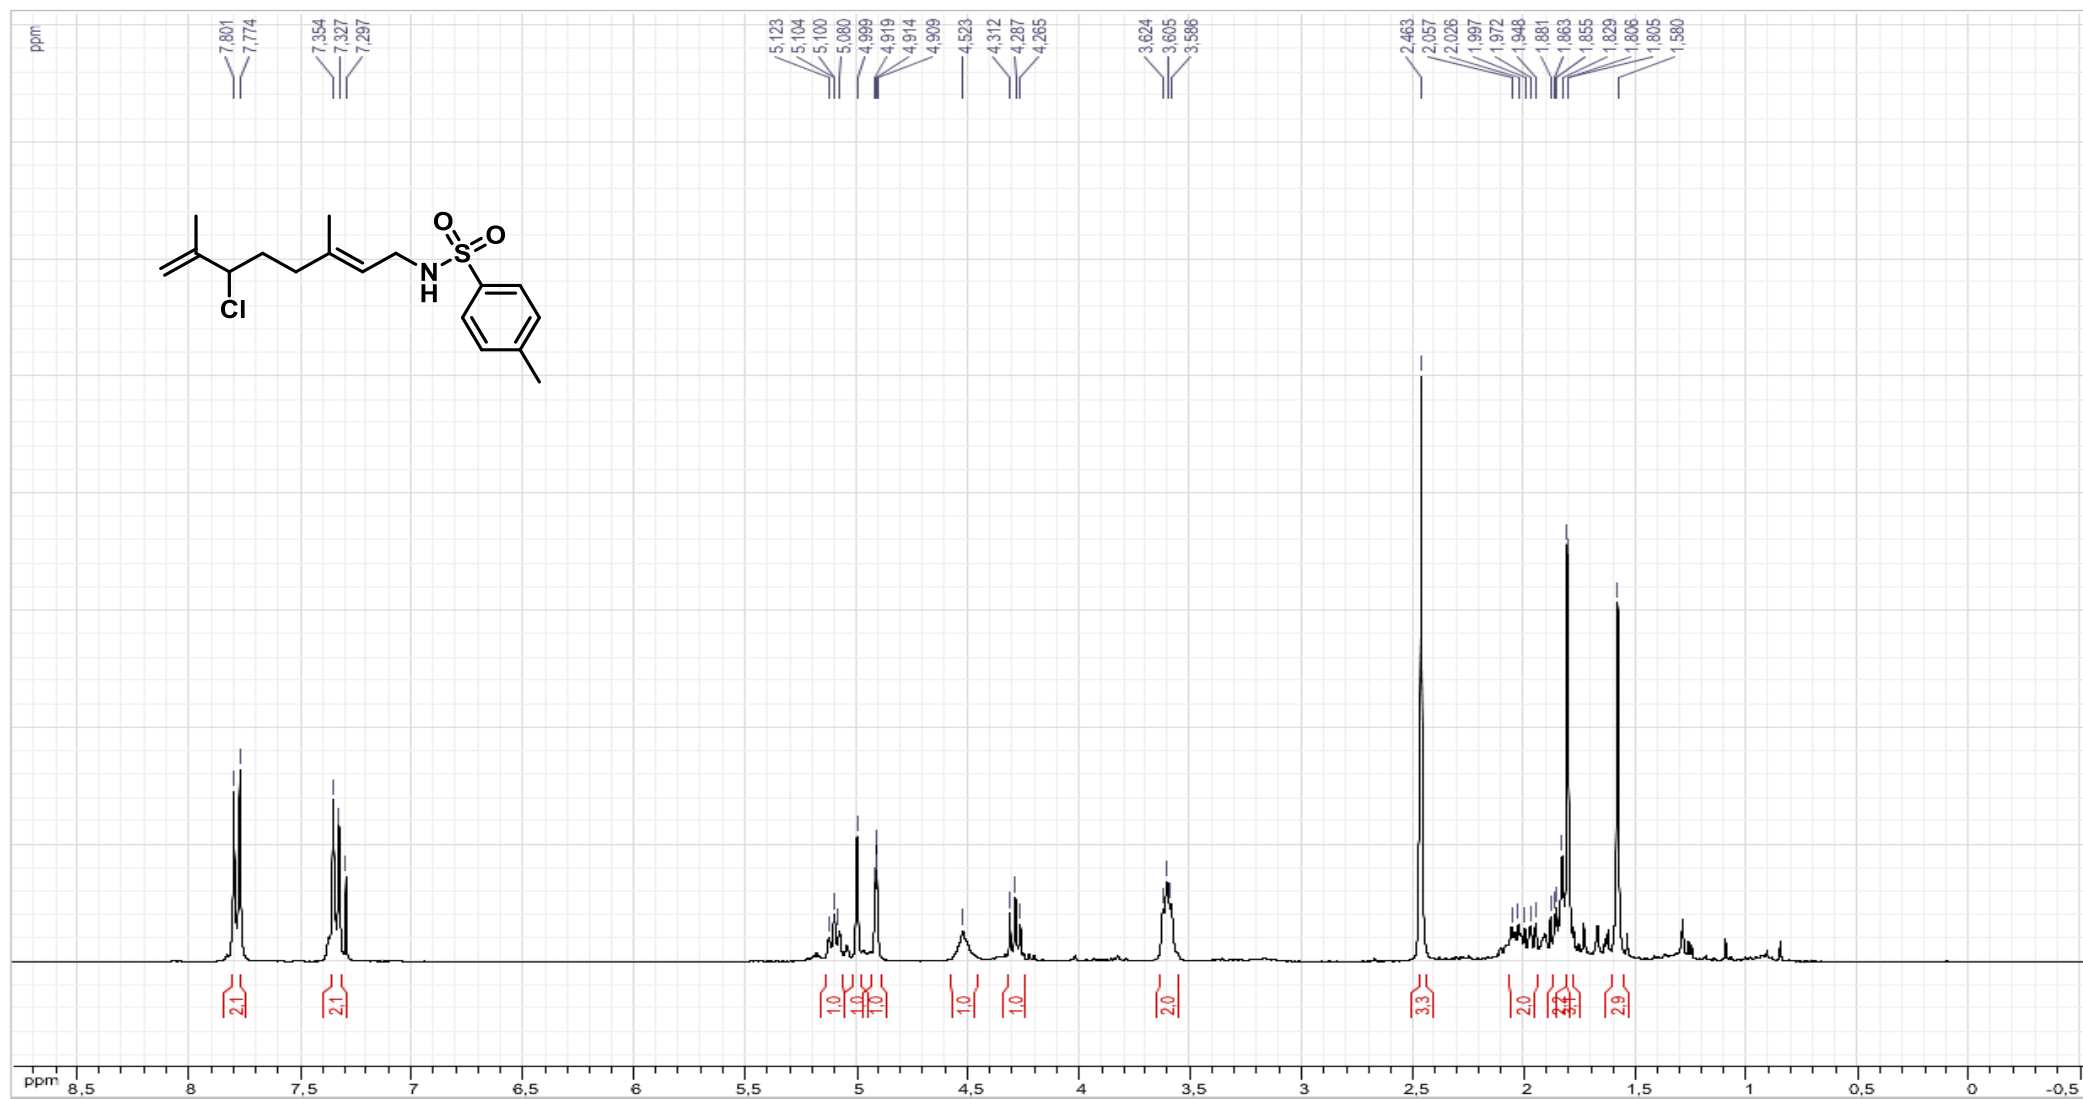

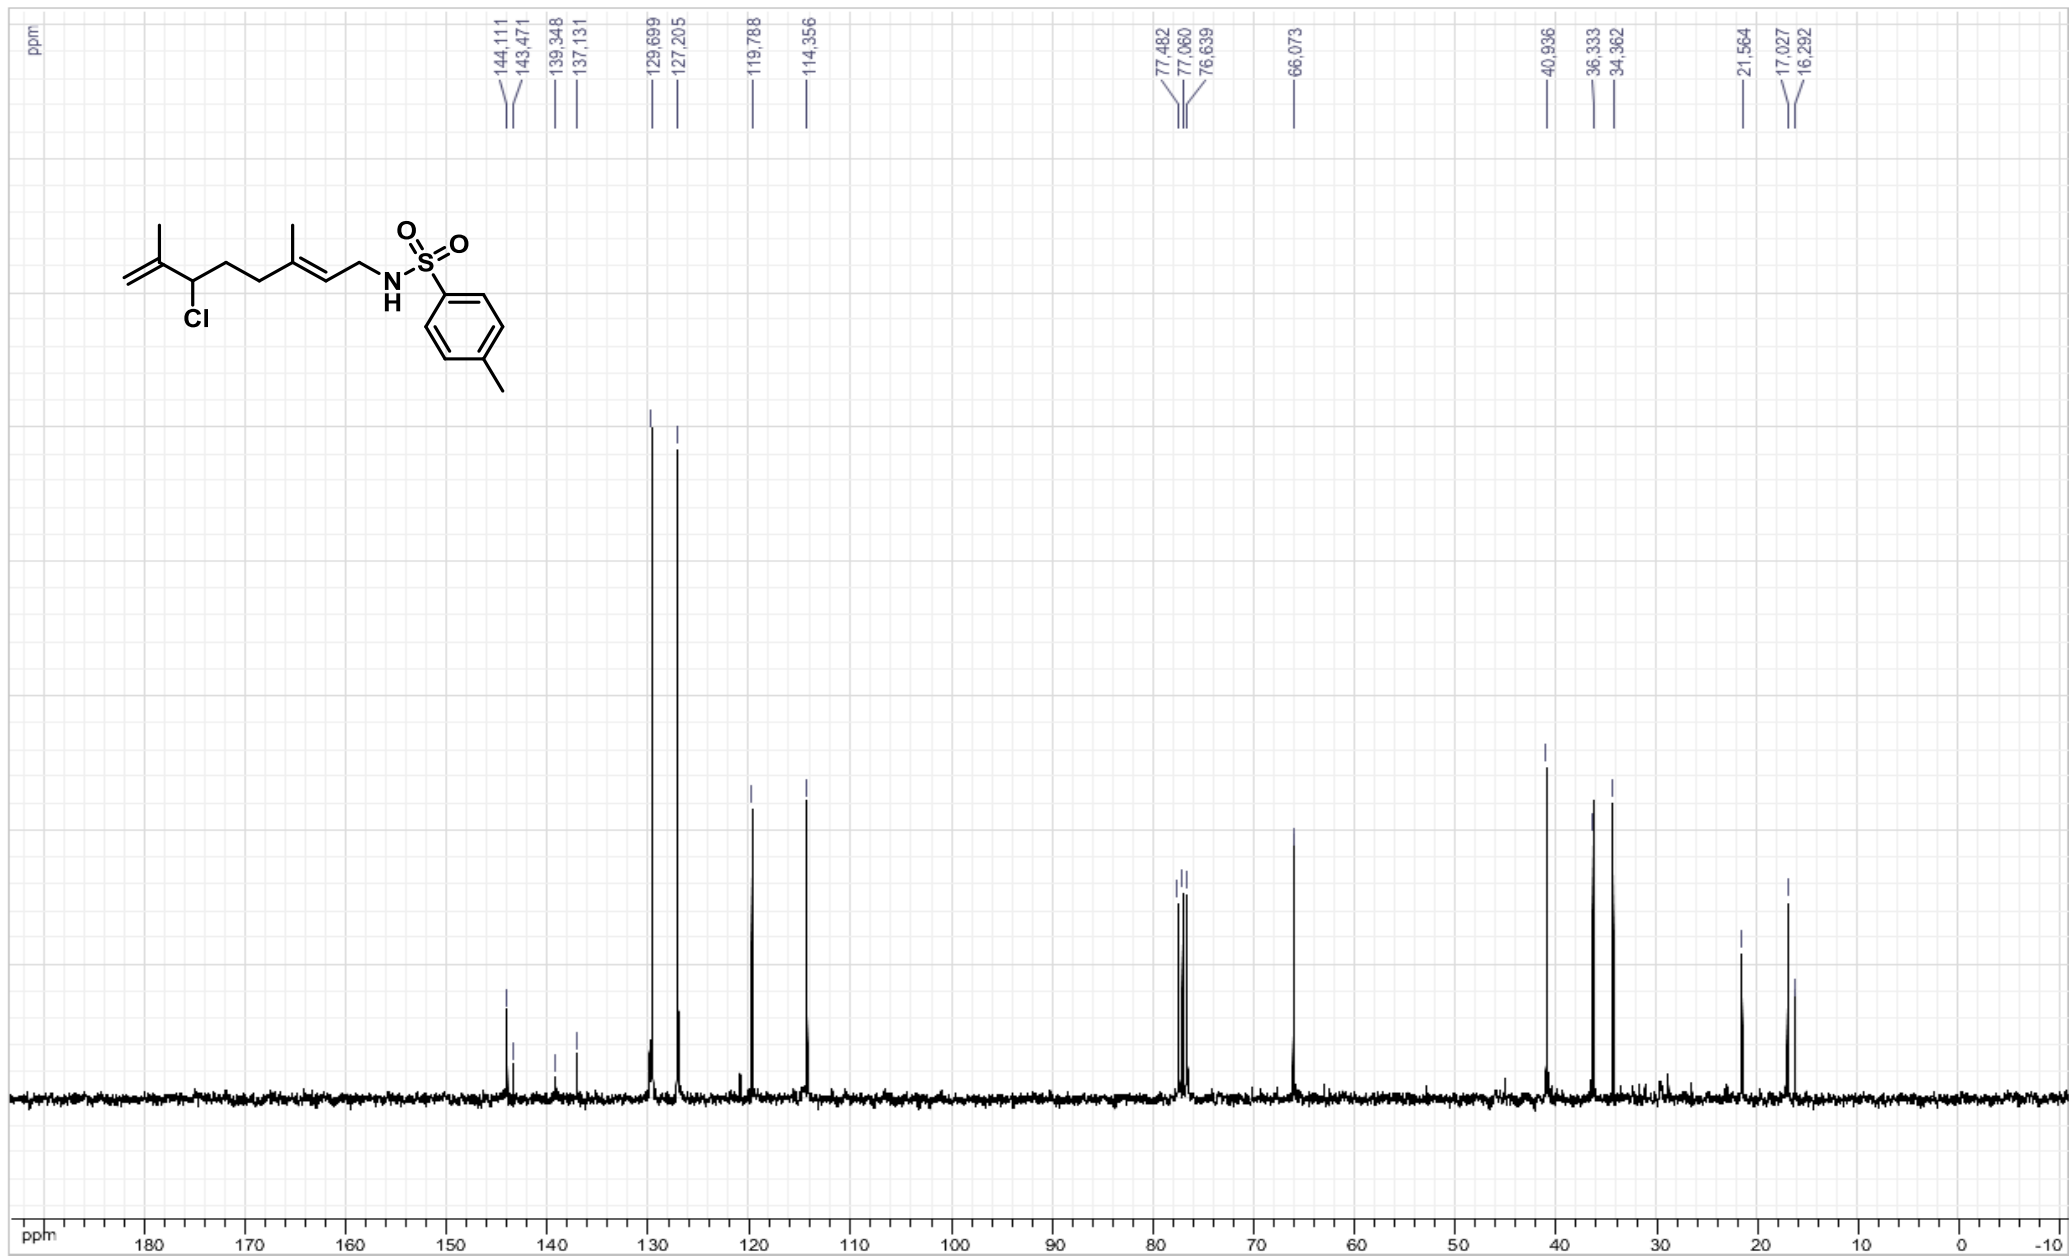

3-Chloro-2-methyl-6-methyleneocta-1,7-diene (6e)

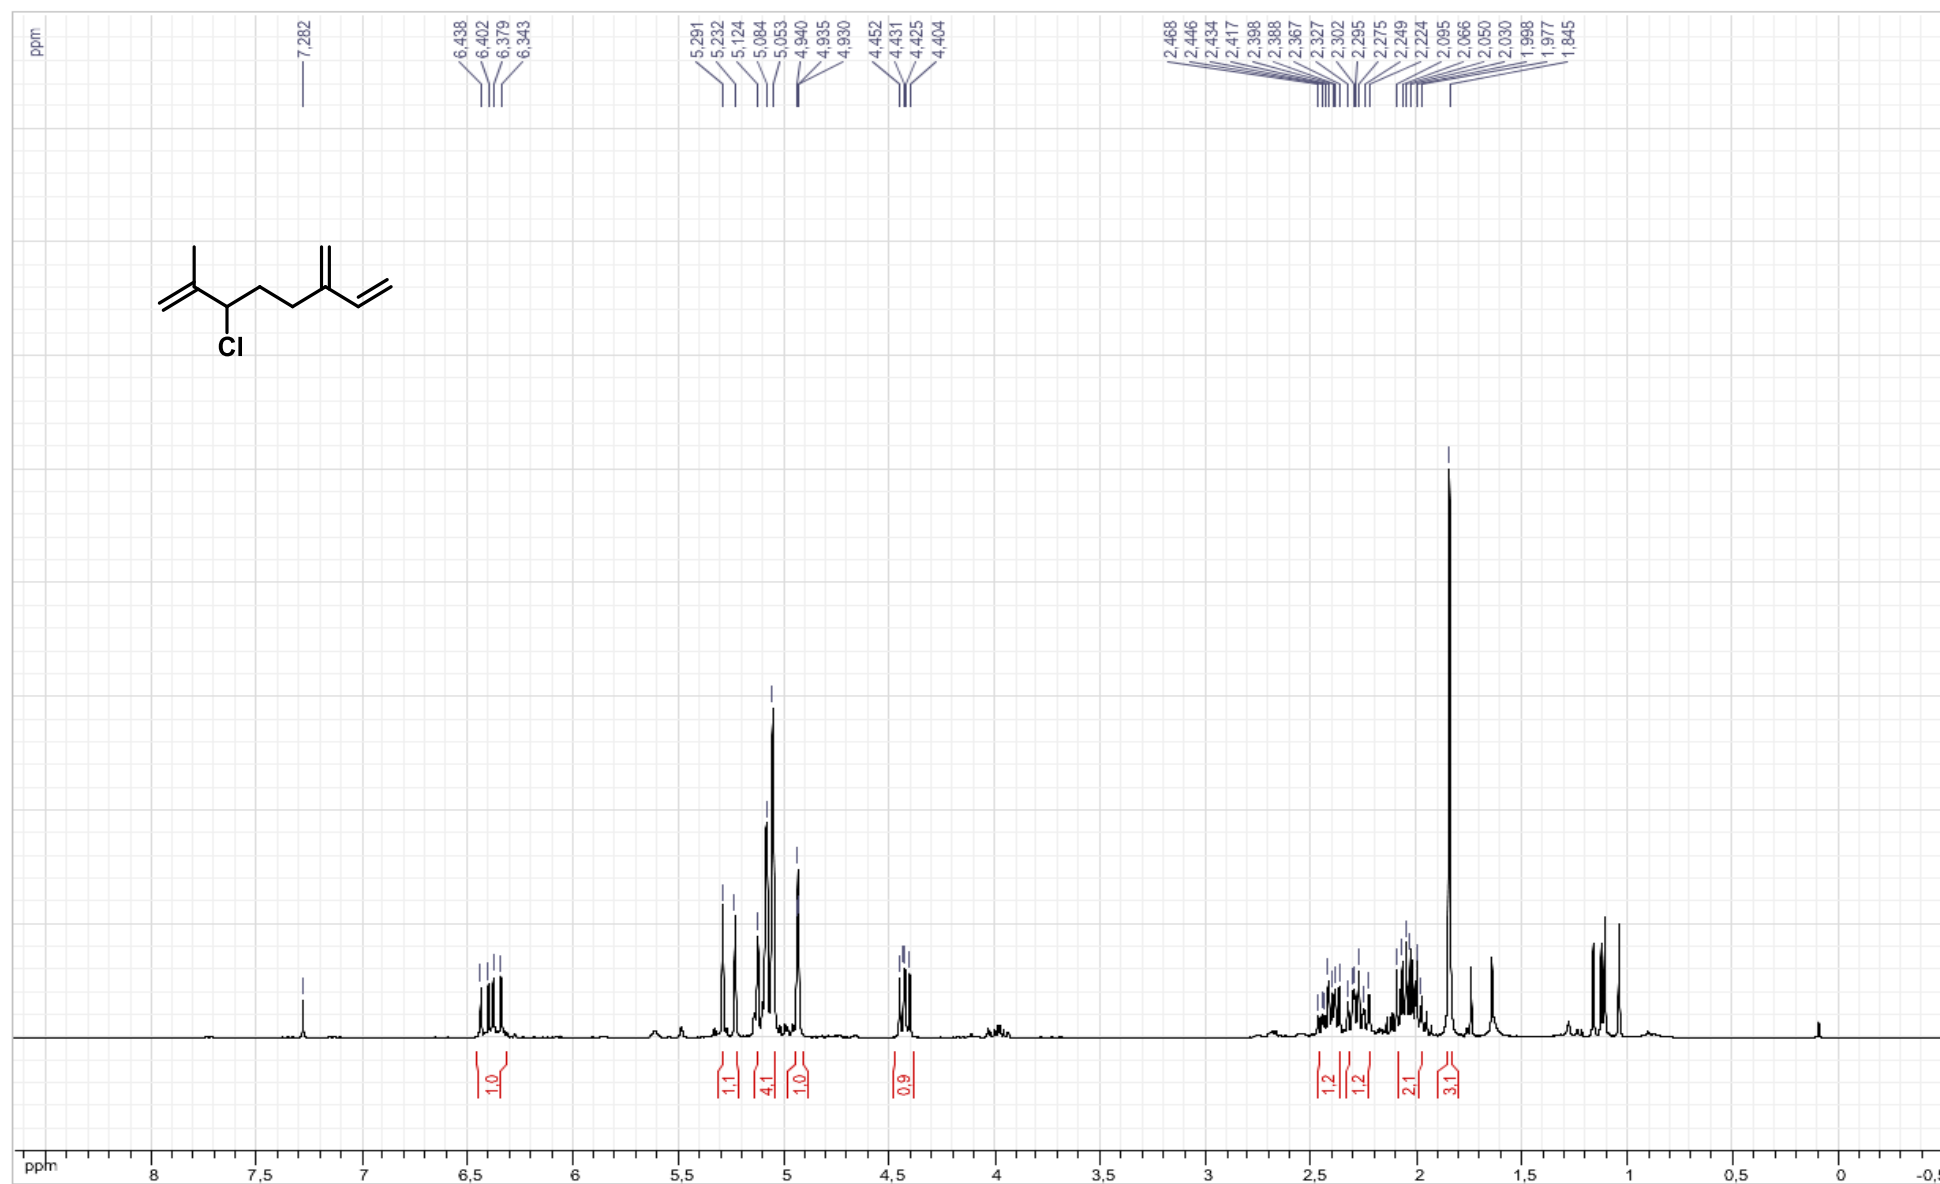

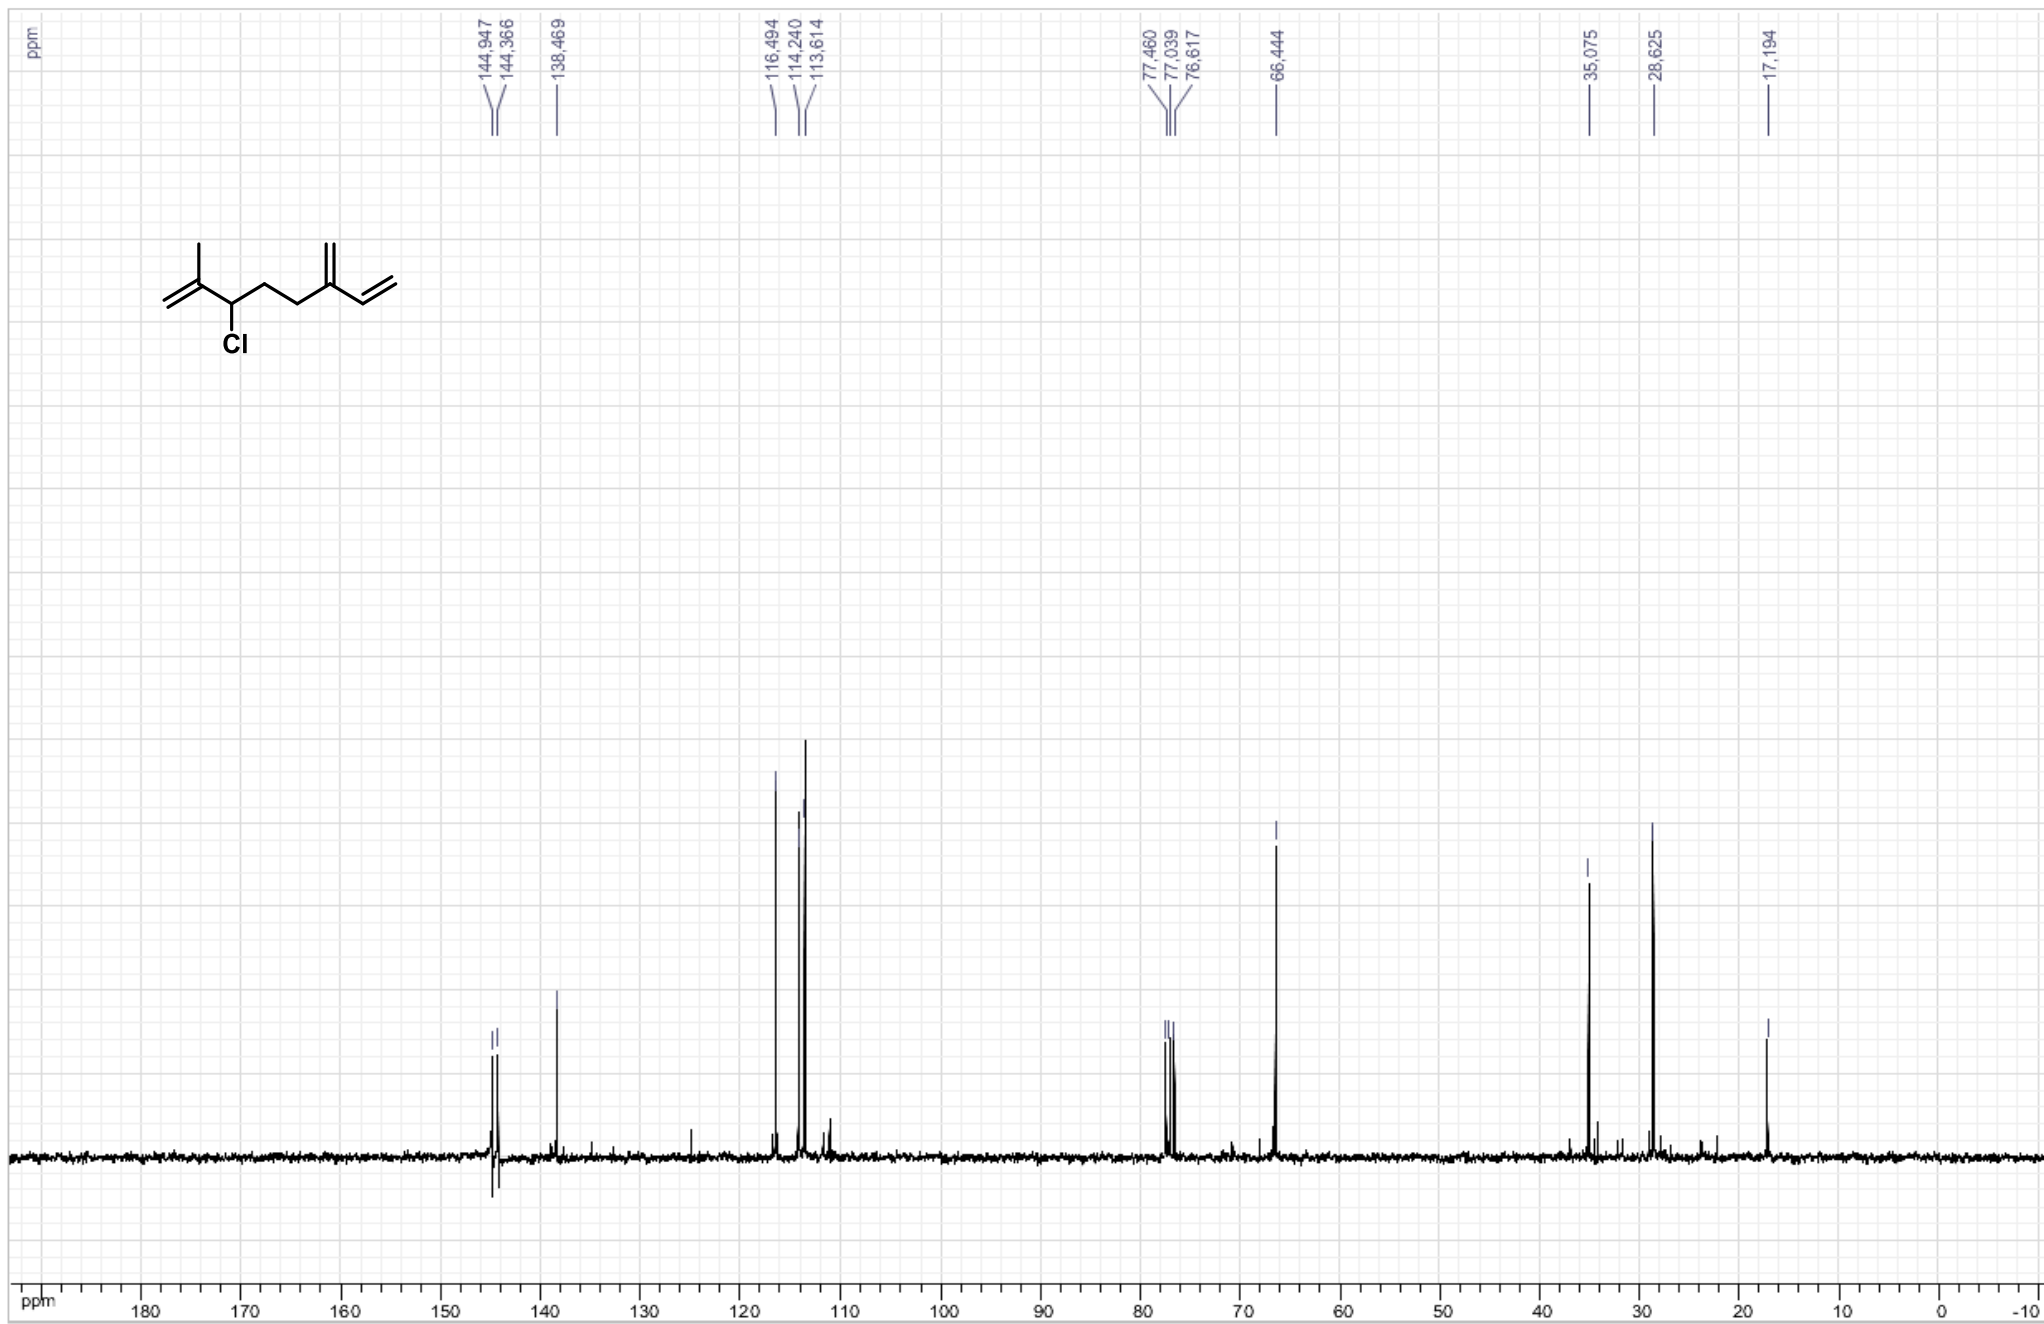

Supplement: Beilstein_J_Org_Chem-14-1103-s001.pdf [file Beilstein_J_Org_Chem-14-1103-s001.pdf]
